1 *November 20<sup>th</sup>, 2020; prepared for submission to bioRxiv*

2

3 **Age-Associated Insolubility of Parkin in Human Midbrain is Linked to Redox Balance and**  
4 **Sequestration of Reactive Dopamine Metabolites**

5

6 Jacqueline M. Tokarew<sup>1,2</sup> \*, Daniel N. El-Kodsi<sup>1,2</sup> \*, Nathalie A. Lengacher<sup>1,2</sup>, Travis K. Fehr<sup>1,2</sup>,  
7 Angela P. Nguyen<sup>1</sup>, Bojan Shutinoski<sup>1</sup>, Brian O’Nuallain<sup>3</sup>, Ming Jin<sup>3</sup>, Jasmine M. Khan<sup>1</sup>, Andy C. H. Ng<sup>1</sup>,  
8 Juan Li<sup>1</sup>, Qiubo Jiang<sup>1</sup>, Mei Zhang<sup>4</sup>, Liqun Wang<sup>3</sup>, Rajib Sengupta<sup>5,5\*</sup>, Kathryn R. Barber<sup>6</sup>, An Tran<sup>6</sup>,  
9 Stephanie Zandee<sup>7</sup>, Xiajun Dong<sup>8</sup>, Clemens R. Scherzer<sup>8</sup>, Alexandre Prat<sup>7</sup>, Eve Tsai<sup>1,9</sup>,  
10 Masashi Takamashi<sup>10</sup>, Nobutaka Hattori<sup>10</sup>, Jennifer A. Chan<sup>11</sup>, Luigi Zecca<sup>12</sup>, Andrew B. West<sup>13</sup>,  
11 Arne Holmgren<sup>5,%</sup>, Lawrence Puente<sup>14</sup>, Gary S. Shaw<sup>6</sup>, Gergely Toth<sup>15</sup>, John M. Woulfe<sup>1,4</sup>, Peggy Taylor<sup>3</sup>,  
12 Julianna J. Tomlinson<sup>1,16</sup> # and Michael G. Schlossmacher<sup>1,16,17</sup> #

13

14

15 <sup>1</sup>Program in Neuroscience, Ottawa Hospital Research Institute, Ottawa, ON, Canada

16 <sup>2</sup>Graduate Program in Cellular and Molecular Medicine (Neuroscience), Faculty of Medicine, University of  
17 Ottawa, Ottawa, ON, Canada

18 <sup>3</sup>BioLegend Inc., Dedham, MA., USA

19 <sup>4</sup>Department of Pathology and Laboratory Medicine, The Ottawa Hospital, Ottawa, ON, Canada

20 <sup>5</sup>Department of Biochemistry, Karolinska Institute, Stockholm, Sweden; <sup>5\*</sup>Present Address: Amity Institute  
21 of Biotechnology, Amity University, Kolkata, West Bengal 700135, India

22 <sup>6</sup>Department of Biochemistry, University of Western Ontario, London, ON, Canada

23 <sup>7</sup>Department of Neuroscience, Faculty of Medicine, University of Montreal, Montreal, QC, Canada

24 <sup>8</sup>Ann Romney Center for Neurologic Diseases, Brigham & Women’s Hospital, Boston, MA, USA

25 <sup>9</sup>Division of Neurosurgery, Department of Surgery, The Ottawa Hospital, Ottawa, ON, Canada

26 <sup>10</sup>Department of Neurology, Juntendo University School of Medicine, Tokyo, Japan

27 <sup>11</sup>Department of Pathology & Laboratory Medicine, University of Calgary, Calgary, AB, Canada

28 <sup>12</sup>Institute of Biomedical Technologies, Italian National Research Council, Segrate (Milano), Italy

29 <sup>13</sup>Departments of Neurobiology and Pharmacology & Cancer Biology, Duke University, Durham, NC,  
30 USA

31 <sup>14</sup>Proteomics Core Facility, Ottawa Hospital Research Institute, Ottawa, ON, Canada

32 <sup>15</sup>Institute of Organic Chemistry, Research Center for Natural Sciences, Budapest, Hungary

33 <sup>16</sup>University of Ottawa Brain and Mind Research Institute, Ottawa, ON, Canada

34 <sup>17</sup>Division of Neurology, Department of Medicine, The Ottawa Hospital, Ottawa, ON, Canada

35

36 \*these authors contributed equally to this work

37 %deceased #Lead contacts: [jtomlinson@ohri.ca](mailto:jtomlinson@ohri.ca); [mschlossmacher@ohri.ca](mailto:mschlossmacher@ohri.ca)

*Parkin Insolubility in Human Midbrain is Linked to Redox Balance*

38 **Abstract**

39 The mechanisms by which parkin protects the adult human brain from Parkinson disease remain  
40 incompletely understood. We hypothesized that parkin cysteines participate in redox reactions, which are  
41 reflected in its posttranslational modifications. We found that in human control brain, including the *S.*  
42 *nigra*, parkin is largely insoluble after age 40 years, which is linked to its oxidation, *e.g.*, at Cys95 and  
43 Cys253. In mice, oxidative stress increases posttranslational modifications at parkin cysteines and reduces  
44 its solubility. Oxidation of recombinant parkin also promotes insolubility and aggregate formation, but in  
45 parallel, lowers hydrogen peroxide (H<sub>2</sub>O<sub>2</sub>). This thiol-based redox activity is diminished by parkin point  
46 mutants, *e.g.*, p.C431F and p.G328E. Intriguingly, in parkin-deficient human brain H<sub>2</sub>O<sub>2</sub> concentrations are  
47 elevated. In *prkn*-null mice, H<sub>2</sub>O<sub>2</sub> levels are dysregulated under oxidative stress conditions, such as acutely  
48 by MPTP-toxin exposure or chronically due to a second genetic hit. In dopamine toxicity studies, wild-type  
49 parkin, but not disease-linked mutants, protects human dopaminergic M17 cells, in part through  
50 lowering H<sub>2</sub>O<sub>2</sub>. Parkin also neutralizes reactive, electrophilic dopamine metabolites via adduct formation,  
51 which occurs foremost at primate-specific Cys95. Further, wild-type but not p.C95A-mutant parkin  
52 augments melanin formation. In sections of normal, adult human midbrain, parkin specifically co-localizes  
53 with neuromelanin pigment, frequently within LAMP-3/CD63<sup>+</sup> lysosomes. We conclude that oxidative  
54 modifications of parkin cysteines are associated with protective outcomes, which include the reduction of  
55 H<sub>2</sub>O<sub>2</sub>, conjugation of reactive dopamine metabolites, sequestration of radicals within insoluble aggregates,  
56 and increased melanin formation. The loss of these redox effects may augment oxidative stress in dopamine  
57 producing neurons of mutant *PRKN* allele carriers, thereby contributing to neurodegeneration.

58 *260 words*

59

60 **Keywords** Early-Onset Parkinson disease • Parkin • *PRKN* Gene • Redox Chemistry • Dopamine  
61 Metabolism • Neuromelanin

62 **Introduction**

63 Bi-allelic mutations in *PRKN*, which encodes parkin, lead to a young-onset, recessive form of Parkinson  
64 disease (PD)[1, 2]. Pathology studies of parkin-deficient brains have demonstrated that neuronal loss is  
65 largely restricted to the *S. nigra* and *L. coeruleus*, two brainstem nuclei that synthesize dopamine (reviewed  
66 in Doherty *et al.*[3]).

67 Parkin is a principally cytosolic protein. It has been associated with diverse cellular functions,  
68 foremost related to its ubiquitin ligase (E3) activity, the control of inflammation signaling, and maintenance  
69 of mitochondrial integrity, as mediated through participation in mitophagy and mitochondrial antigen  
70 presentation (MITAP)[4-11] (reviewed in Barodia *et al.* [12]). Although mitophagy has recently been  
71 shown to be co-regulated by parkin in the developing heart of mice [13], the diverse roles ascribed to  
72 parkin function have not yet explained its selective neuroprotection. For example, vertebrate models of  
73 genomic *prkn* deletion do not reproduce dopamine cell loss; one exception is the parkin-deficient *Polg*  
74 mouse, where mitochondrial DNA mutagenic stress had been added as a second, genetic hit [14]. The  
75 general lack of dopamine cell loss in genomic parkin deficiency-based models could be due to  
76 compensatory mechanisms [15], a shorter life span of non-human mammals, and possibly, unique aspects  
77 of dopamine's breakdown in humans. The latter is exemplified by the generation of cytoplasmic  
78 neuromelanin in dopamine synthesizing neurons beginning after childhood [16]. Nevertheless, genomic  
79 *prkn*-null models have revealed biochemical and structural changes in high energy-producing cells of flies  
80 and murine tissues [12, 17, 18], which suggested the presence of elevated oxidative stress [19-21]. These  
81 observations pointed at a contribution of parkin to redox homeostasis *in vivo*.

82 Redox equilibrium invariably involves cysteine-based chemistry. There, thiols are subject to  
83 oxidative modifications by reactive oxygen-, reactive nitrogen- and reactive electrophilic species (ROS,  
84 RNS, RES) [22, 23], some of which are reversible. Proteins irreversibly conjugated by RES, including by  
85 electrophilic dopamine radicals, are either degraded or sequestered within inclusions. It is thought that the  
86 latter process occurs via lysosomal functions and underlies neuromelanin formation throughout adulthood  
87 [24].

88 Human parkin contains 35 cysteines (Cys; single letter code, C) [1], its murine homologue 34. Of  
89 these, 28 cysteines are involved in the chelation of eight zinc ions within four RING domains [25].  
90 Although Cys431 has been identified as critical in catalyzing parkin's E3 ligase function, 6 other cysteines  
91 are structurally unaccounted for, including Cys95 located within parkin's 'linker' domain. Several reports  
92 have demonstrated unique sensitivity of parkin to ROS and RES in cells [26-28]. Further, RNS and  
93 sulfhydrylation also alter its cysteines residues, and NO-/NO<sub>2</sub>-modified parkin variants have been described  
94 in cells and brain tissue [29-33]. Oxidation of parkin has been linked to both activating ('gain-of-function')  
95 and detrimental ('loss-of-function') outcomes when tested in the context of parkin's E3 ligase activity *in*  
96 *vitro* [27, 29, 31, 34].

97 We found that wild-type parkin is highly oxidized and insoluble in adult human midbrain, leading  
98 us to explore non-E3 ligase-mediated protective functions, as informed by its metabolism. Owing to its

*Parkin Insolubility in Human Midbrain is Linked to Redox Balance*

99 number of cysteine-based thiols, we hypothesized that parkin could confer neuroprotection by acting as an  
100 anti-oxidant molecule and that it contributes to redox balance *in vivo* by reducing ROS/RNS levels and  
101 conjugating dopamine radicals (RES). We posit that selective neurodegeneration in *PRKN*-linked,  
102 autosomal-recessive PD (ARPD) could be partially explained by the absence of parkin-mediated  
103 sequestration of toxic metabolites during decades of human ageing.

104

105 **Materials and methods**

106 **Tissue collection**

107 All tissues were collected in accordance with Institutional Review Board-approved guidelines. Fresh  
108 frozen samples of cortical human brain from subjects under 50 years of age were acquired through the  
109 University of Alabama and the Autism Tissue Program. *Post mortem*, frozen brain samples from frontal  
110 cortices were also obtained from the NICHD Brain and Tissue Bank at the University of Maryland. Brain  
111 tissues, including midbrain specimens, with short PMI were also obtained from patients diagnosed with  
112 clinical and neuropathological multiple sclerosis (MS) according to the revised 2010 McDonald's criteria  
113 (n=4) [35]. Tissue samples were collected from MS patients with full ethical approval and informed  
114 consent as approved by the Montreal-based CRCHUM research ethics committee. Autopsy samples were  
115 preserved and lesions classified using Luxol Fast Blue / Haematoxylin & Eosin staining and Oil Red-O  
116 staining as previously published [36, 37]. No inflamed tissue areas were used in this current study.

117 Additional, fresh-frozen and paraffin-embedded human samples were obtained from the Neuropathology  
118 Service at Brigham and Women's Hospital in Boston, MA. and from archived autopsy specimens in the  
119 Department of Pathology and Laboratory Medicine of The Ottawa Hospital, Ottawa, ON. Human spinal  
120 cord and muscle tissues were collected *post mortem* from organ donors at The Ottawa Hospital with  
121 approval from the Ottawa Health Science Network Research Ethics Board.

122

123 **Mouse tissues**

124 Brains and hearts were collected from wild-type C57Bl/6J from Jackson laboratories, *prkn*-null from Dr.  
125 Brice's laboratory [21], *Sod2* +/- mice from Jackson laboratories; the bi-genic mouse (*prkn*<sup>-/-</sup>/*Sod2*<sup>+/-</sup>) was  
126 created by crossing *prkn*-null mice with *Sod2* haploinsufficient mice, and interbreeding heterozygous  
127 offspring. These bi-genic mice have been characterized elsewhere (El Kodsi et al., in preparation [38]).  
128 Mouse brains collected were homogenized on ice in a Dounce glass homogenizer by 20 passes in Tris salt  
129 buffer with or without the addition of 1% H<sub>2</sub>O<sub>2</sub>, transferred to ultracentrifuge tubes and spun at 55,000 and  
130 4°C for 30 mins to extract the soluble fraction. The resulting pellets were further homogenized in the tris  
131 salt buffer with the addition of 2-10% SDS, transferred to ultracentrifuge tubes and spun at 55,000 rpm and  
132 10°C for 30 minutes to extract the insoluble fraction.

133 Wild-type C57Bl/6J mice were used for analysis of the effects of *post mortem* interval on murine  
134 parkin in the brain. Mice ranging from 4 to 8 months in age were perfused with PBS and their brains were  
135 collected for *post mortem* interval experiments.

## *Parkin Insolubility in Human Midbrain is Linked to Redox Balance*

### 136 **Sequential extraction of parkin from tissue**

137 Roughly 1 cm<sup>3</sup> samples of human brain frontal cortex and midbrain (age range 5-85 years of age) were  
138 weighed and placed in 3X volume/weight of Tris Salt buffer (TSS) (5mM Tris, 140 mM NaCl pH 7.5)  
139 containing complete EDTA-free protease inhibitor cocktail, and 10 mM iodoacetamide (IAA). The samples  
140 were homogenized on ice in a Dounce glass homogenizer by 50 passes, transferred to ultracentrifuge tubes  
141 and spun at 55,000 rpm and 4°C for 30 mins. The TS supernatant was transferred to a fresh tube and the  
142 pellet was extracted further with addition of 3x volume/weight of Triton X-100 buffer (TX, TS + 2 %  
143 Triton X-100). The samples were mixed by vortex, incubated on ice for 10 min and centrifuged again using  
144 the same prior setting. The TX supernatant was transferred to a fresh tube and the pellet was extracted  
145 further with addition of 3x volume/weight of SDS buffer (SDS, TS + 2 % SDS). The samples were mixed  
146 by vortex, incubated at room temperature for 10 min and centrifuged again at 55,000 rpm and 12°C for 30  
147 mins. The SDS supernatant was transferred to a fresh tube and the pellet was either stored at -80°C or  
148 extracted further with addition of 3X volume/weight of 6X non-reducing Laemmli buffer (LB, 30 % SDS,  
149 60 % glycerol, 0.3 % bromophenol blue, 0.375 M Tris. pH 6.8, 100mM DTT), mixed by vortex and  
150 incubated at room temperature for 10 min. Samples were centrifuged again at 55,000 rpm and 12°C for 30  
151 mins and the LB supernatant was transferred to a fresh tube. Extracted proteins from TS, TXS and SDS  
152 buffers including pellet (20-30 µg) and 10-20 µL of LB extracts were run on SDS-PAGE using reducing  
153 (100 mM dithiothreitol, DTT) and/or non-reducing (0 mM DTT) loading buffer. Following transfer to  
154 membranes, Ponceaus S staining was used to confirm loading, and samples were blotted for parkin  
155 (Biolegend 808503, 1: 5,000), DJ-1 (ab18257, 1: 2,000),  $\alpha$ -synuclein (syn1 1:1,000 or MJFR1 1:2000),  
156 LC3B (3868 1:2000), VDAC (MSA03 1:5000), MnSOD and GLO1 (1:1000), calnexin (MAB3126),  
157 cathepsin D (sc-6486), GRP75 (sc-1058). ImageJ software (1.52 k, National Institutes of Health, USA) was  
158 used for signal quantification purposes.

159

### 160 **mRNA Analysis**

161 *PRKN* mRNA isolated from individual *S. nigra* dopamine neurons (SNDA), cortical pyramidal neurons  
162 (PY) and non-neuronal, blood mononuclear cells (NN) were processed, as described [39] and as annotated  
163 in the Human BRAINcode database ([www.humanbraincode.org](http://www.humanbraincode.org)).

164

### 165 **ROS (H<sub>2</sub>O<sub>2</sub>) measurements in recombinant protein preparations, tissues and cell lysates**

166 Amplex<sup>®</sup> Red hydrogen peroxide/peroxidase assay kit (Invitrogen A22188) was used to monitor  
167 endogenous levels of H<sub>2</sub>O<sub>2</sub> in tissues and cells, and residual levels of H<sub>2</sub>O<sub>2</sub> after incubation with  
168 recombinant parkin (WT, or pre-incubated with increasing concentrations of H<sub>2</sub>O<sub>2</sub>, NEM, or EDTA), DJ-1,  
169 SNCA, BSA, RNF43 (BioLegend), HOIP (Boston Biochem), GSH, catalase, NEM and EDTA for 30  
170 minutes. Pre-weighed cortex pieces from human brains (or pelleted cells) were homogenized on ice in the  
171 1x reaction buffer provided, using a Dounce homogenizer (3 times volume to weight ratio). Homogenates  
172 were diluted in the same 1x reaction buffer (10x and 5x). A serial dilution of the H<sub>2</sub>O<sub>2</sub> standard provided

### *Parkin Insolubility in Human Midbrain is Linked to Redox Balance*

173 was prepared (20, 10, 2 and 0  $\mu\text{M}$ ). 50  $\mu\text{L}$  of standards and samples were plated in a 96 well black plate  
174 with clear flat bottom. The reaction was started by the addition of 50 $\mu\text{L}$  working solution which consisted  
175 of 1x reaction buffer, Amplex<sup>®</sup> red and horseradish peroxidase. The plate was incubated at room  
176 temperature for 30 minutes protected from light. A microplate reader was used to measure either  
177 fluorescence with excitation at 560 nm and emission at 590 nm, or absorbance at 560 nm. The obtained  
178  $\text{H}_2\text{O}_2$  levels ( $\mu\text{M}$ ) were normalized to the tissue weight (g) or protein concentration ( $\mu\text{g}/\mu\text{L}$ ). The same  
179 assay was also used to measure parkin and glutathione's peroxidase activity compared to horseradish  
180 peroxidase (HRP).

181

#### 182 **Recombinant protein expression using a pET-SUMO vector**

183 Wild-type and truncated (amino acid 321-465) human parkin proteins were expressed as 6His-Smt3 fusion  
184 proteins in *Escherichia coli* BL21 (DE3) Codon-Plus RIL competent cells (C2527, New England Biolabs)  
185 as previous described [40-42]. *DJ-1* and *SNCA* coding sequences were cloned from a pcDNA3.1 vector into  
186 the pET-SUMO vector using PCR and restriction enzymes. ARPD-associated parkin mutants in the pET-  
187 SUMO vector were generated using site-directed mutagenesis. All proteins were overexpressed in  
188 *Escherichia coli* BL21 Codon-Plus competent cells (C2527, New England Biolabs) and grown at 37 °C in 2  
189 % Luria Broth containing 30 mg/L kanamycin until OD<sub>600</sub> reached 0.6, at which point the temperature  
190 was reduced to 16°C. All parkin-expressing cultures were also supplemented with 0.5 mM  $\text{ZnCl}_2$ . Once  
191 OD<sub>600</sub> reached 0.8, protein expression was induced with isopropyl  $\beta$ -D-1-thiogalactopyranoside, except  
192 ulp1 protease, which was induced once OD<sub>600</sub> had reached 1.2. The concentration of isopropyl  $\beta$ -d-1-  
193 thiogalactopyranoside (IPTG) used for each construct is as follows: 25  $\mu\text{M}$  for wild-type and  
194 point mutants of parkin, and 0.75 mM for truncated parkin, DJ-1,  $\alpha$ -synuclein, and ulp1 protease.  
195 Cultures were left to express protein for 16-20 h. Cells were then harvested, centrifuged, lysed  
196 and collected on Ni-NTA agarose beads in elution columns.

197 Plasmid encoding for human Parkin with a p.C95A substitution was generated with the use of a restriction-  
198 free cloning strategy (PMID: 20600952) using the following primers: *PRKN* forward:

199 CAGAAACGCGGGCGGGAGGCgcTGAGCGGGAGCCCCAGAGCT and *PRKN* reverse:

200 CATCCAGCAAGATGGACCC.

201

#### 202 **Protein redox chemistry and oxidation of cysteine-containing proteins *in vitro***

203 The recombinant protein samples were first prepared by removing excess TCEP, present in the elution  
204 buffer using repeat centrifugations (8 times 4000 x g at 4°C for 10 min) in Amicon Ultra 10kDa MWCO  
205 filters. The protein concentrations were measured and adjusted to 20 $\mu\text{M}$ . Stock solutions of hydrogen  
206 peroxide ( $\text{H}_2\text{O}_2$ , 9.8 mM) were prepared.

207 Aminochrome was freshly synthesized from dopamine (see below). An aliquot of 10 $\mu\text{L}$  of each  
208 protein sample (at 20  $\mu\text{M}$ ) was reacted with oxidants at the following concentrations: 0, 2, 20, 50, 200  
209 aminochrome; 0, 20, 200, 500, 750, 1000, 2000  $\mu\text{M}$   $\text{H}_2\text{O}_2$  or 0, 10, 50, 100, 200, 500, 1,000  $\mu\text{M}$  DTT. The

*Parkin Insolubility in Human Midbrain is Linked to Redox Balance*

210 samples were treated for 30 min at 37°C and centrifuged at 14,000 rpm for 15 min. The supernatant was  
211 transferred to a fresh tube and the remaining pellet was extracted with 10µL of T200-TCEP containing  
212 either 10 % SDS or 100 mM DTT. The pellets were incubated again for 30 min at 37°C and centrifuged at  
213 14,000 rpm for 15 min. Laemmli buffer (10 µL, containing 100 mM mercaptoethanol) was added to both  
214 the pellet and supernatant fractions and samples were separated on two SDS-PAGE. One gel was used for  
215 in-gel protein staining and the other was used for NBT staining. Specific bands of aminochrome treated  
216 wild-type, full length r-parkin were excised from silver-stained gels and analyzed by LC-MS/MS as  
217 described below.

218

219 **Aminochrome synthesis**

220 A solution of 0.1 M sodium phosphate buffer pH 6.0 was prepared from a mixture of 12 mL of 1M  
221 NaH<sub>2</sub>PO<sub>4</sub> and 88.0 mL of 1M Na<sub>2</sub>HPO<sub>4</sub>. The reaction buffer (0.067 M sodium phosphate, pH 6.0) was  
222 prepared by adding 33 mL of 0.1 M sodium phosphate buffer to 17 mL water. A solution of 10mM  
223 dopamine in reaction buffer was prepared by adding 19 mg of dopamine hydrochloride to 1 mL of reaction  
224 buffer. Oxidation was activated by adding 5 µL of tyrosinase (25,000 U/mL) and the mixture was incubated  
225 at room temperature for 5 min. The tyrosinase was separated from the oxidized dopamine using a 50 kDa  
226 cut-off Amicon Ultra centrifugation filter by centrifuging at 14,000 rpm for 10 min. The absorbance of the  
227 filtrate was measured at a wavelength of 475 nm using Ultrospec 21000 pro spectrophotometer and the  
228 concentration of aminochrome was determined using the Beer-Lambert equation and extinction coefficient  
229 of 3058 L x mol<sup>-1</sup> x cm<sup>-1</sup>.

230

231 **Protein staining methods**

232 All proteins were separated on pre-cast 4-12 % Bis-Tris SDS-PAGE gels (NPO321BOX, NPO322BOX,  
233 NPO336BOX) from Invitrogen using MES running buffer (50mM MES, 50mM Tris, 1mM EDTA and 0.1  
234 % SDS, pH 7.3) and Laemmli loading buffer (10% SDS, 20% glycerol, 0.1% bromophenol blue, 0.125M  
235 Tris HCl, 200mM DTT or β-mercaptoethanol). Proteins were stained in gel using SilverQuest™ Silver  
236 Staining Kit (LC6070) from Invitrogen or Coomassie brilliant blue R-250 dye (20278) from ThermoFisher  
237 Scientific using the following protocol: The gel was transferred to a plastic container and rocked for 30 min  
238 in Fix Solution (10% acetic acid, 50% methanol), followed by staining for 2-24 h (0.25% Coomassie R250)  
239 until the gel turned a uniform blue. The stain was replaced with Destain Solution (7.5% acetic acid and 5%  
240 methanol) and the gel was rocked until crisp blue bands appeared. Following a wash with water the gel was  
241 stored in 7 % acetic acid. Proteins transferred to PVDF (1620177, Bio-Rad) membranes were stained with  
242 Ponceau S solution for 20 min, washed three times with water, imaged and then destained with 0.1M  
243 NaOH prior to Western blotting.

244

245

246

*Parkin Insolubility in Human Midbrain is Linked to Redox Balance*

247 **Dynamic light scattering assay**

248 For each recombinant protein preparation tested, the buffer (50mM Tris, 200mM NaCl and 250 $\mu$ M TCEP,  
249 pH 7.5) was exchanged for a 20mM phosphate buffer with 10mM NaCl (pH 7.4). 20  $\mu$ M full-length wild-  
250 type r-parkin was centrifuged at 14,000 rpm for 60 min at 4 °C and light scattering intensity of the  
251 supernatant was collected 30 times at an angle of 90° using a 10 sec acquisition time. Measurements were  
252 taken at 37 °C using a Malvern Zetasizer Nano ZS instrument equipped with a thermostat cell. The  
253 correlation data was exported and analyzed using the nanoDTS software (Malvern Instruments). The  
254 samples were measured at 0-, 1-, 3- and 5 hours. Following 24 hr incubation, 2 mM DTT was added to the  
255 sample and the light scattering intensity of the supernatant was measured again.

256

257 **Far UV circular dichroism spectroscopy**

258 15  $\mu$ M of reduced and partially oxidized full-length wild-type r-parkin was measured at t = 0 and t = 5 days  
259 of incubation under native conditions in 20 mM phosphate, 10 mM NaCl buffer. The aggregates rich phase  
260 and the monomer rich phase in the samples were separated with ultracentrifugation (100,000 g for 2 hours).  
261 Far UV circular dichroism (CD) spectra were recorded for the monomer and aggregated rich phase of  
262 protein samples using a JASCO J-720 spectrometer. The final spectrum was taken as a background-  
263 corrected average of 5 scans carried out under the following conditions: wavelength range 250–190 nm at  
264 25 °C; bandwidth was 1 nm; acquisition time was 1 sec and intervals was 0.2 nm. Measurements were  
265 performed in a 0.01 cm cell. CD spectra were plotted in mean residue molar ellipticity units (deg cm<sup>2</sup> dmol<sup>-1</sup>)  
266 calculated by the following equation:  $[\Theta] = \Theta_{\text{obs}} / (10ncl)$ , where  $[\Theta]$  is the mean residue molar ellipticity  
267 as a function of wavelength,  $\Theta_{\text{obs}}$  is the measured ellipticity as a function of wavelength (nm),  $n$  is the  
268 number of residues in the protein,  $c$  is the concentration of the protein (M), and  $l$  is the optical path length  
269 (cm). Secondary structure analysis of proteins using CD spectroscopic data was carried out using the  
270 BeStSel (Beta Structure Selection) software [43, 44].

271 **Chemiluminescence-based, direct reactive oxygen species (ROS) assay**

272 The assay was modified from Muller et al. 2013 [45] to measure the ROS-quenching ability of parkin  
273 proteins, DJ-1, SNCA, BSA, GSH, and catalase. Protein concentrations were quantified using Bradford  
274 assay and adjusted to 5, 10, 15 and 30  $\mu$ M in buffer not containing TCEP. BSA (10 and 20  $\mu$ M), GSH (15,  
275 20, 200, 400, 800 and 2000  $\mu$ M), and catalase (0.015, 0.15, 0.25 and 15  $\mu$ M) were prepared. Stock solutions  
276 of H<sub>2</sub>O<sub>2</sub> for standard curve were prepared at 5, 10, 20, 40 and 50 mM in 0.1 M Tris HCl pH 8.0 using 30 %  
277 H<sub>2</sub>O<sub>2</sub>. Stock solutions of 300 mM luminol and 40 mM 4-iodophenol were prepared in DMSO and protected  
278 from light. Signal reagent, containing 1.94 mM luminol and 0.026 mM 4-iodophenol, was prepared in 0.1  
279 M Tris HCl pH 8.0 and protected from light. A 0.4 % horseradish peroxidase solution was prepared using  
280 HRP-linked anti-rabbit secondary antibody diluted in Stabilizyme solution (SurModics SZ02). Each read  
281 was set up in triplicate on a white polystyrene 96-well plate (ThermoFisher 236105) and to each well was  
282 added 80  $\mu$ L Stabilizyme, 15  $\mu$ L of 0.4 % horseradish peroxidase (HRP) and 25  $\mu$ L of sample or controls.  
283 One of the injectors in a Synergy H1Multi-Mode Plate Reader (Bio Tek) was primed and set to inject 15  $\mu$ L



*Parkin Insolubility in Human Midbrain is Linked to Redox Balance*

284 of signal reagent and 15  $\mu\text{L}$  of each  $\text{H}_2\text{O}_2$  stock solution was manually added to corresponding controls and  
285 samples just prior to reading. Final concentrations of reagents were 0.04 % HRP, 500, 1000, 2000, 4000  
286 and 5000  $\mu\text{M}$   $\text{H}_2\text{O}_2$ , 194  $\mu\text{M}$  luminol, 2.6  $\mu\text{M}$  4-iodophenol and 0.8, 1.7, 2.5 or 5  $\mu\text{M}$  of protein. The plate  
287 reader was set to measure luminescence every 1 min for a total of 10 min. The resulting kinetic data was  
288 converted to area under the curve (AUC) using Prism version 6. For samples pre-incubated with 20 mM  
289 iodoacetamide, a stock solution of 1 M iodoacetamide was prepared. To each well containing 25  $\mu\text{L}$  of  
290 sample, 0.52  $\mu\text{L}$  of 1 M iodoacetamide and 0.48  $\mu\text{L}$  of buffer not containing TCEP was added and the  
291 samples were incubated for 2 h at 37°C. Following incubation, the reagents for chemiluminescence were  
292 added as above except 79  $\mu\text{L}$  of Stabilizyme was used instead of 80  $\mu\text{L}$  and the samples were analyzed as  
293 above.

294

295 **Thiol quantification in recombinant proteins**

296 Recombinant protein samples were first prepared by exchanging the T200 protein buffer (50 mM Tris, 200  
297 mM NaCl and 250  $\mu\text{M}$  TCEP, pH 7.5) for T200-TCEP using repeat centrifugations (8 times 4000 x g at  
298 4°C for 10 min) in Amicon Ultra 10 kDa MWCO filters. The protein concentrations were measured and  
299 recorded. The glutathione stock solution of 32,539  $\mu\text{M}$  was prepared by dissolving 1 mg glutathione (GSH)  
300 in 1 mL of T200-TCEP and the standards 0, 50, 101, 203, 406, 813 and 1000  $\mu\text{M}$  were prepared by serial  
301 dilution in T200-TCEP. The reaction buffer (0.1 M sodium phosphate, pH 8.0) was prepared by adding  
302 93.2 mL 1M  $\text{Na}_2\text{HPO}_4$  and 6.8 mL of  $\text{NaH}_2\text{PO}_4$  in 1 L of water. Thiol detecting reagent (Ellman's reagent)  
303 was prepared by dissolving 2 mg of 5,5'-dithio-bis-[2-nitrobenzoic acid] (DNTB) in 1 mL of reaction  
304 buffer. The assay was performed in 96-well clear round bottom plates by adding 50  $\mu\text{L}$  of thiol detecting  
305 reagent to 50  $\mu\text{L}$  of sample or standard and incubating for 15 min at room temperature. The resulting 5-  
306 thio-2-nitrobenzoic-acid (TNB) produced was measured by absorbance at 412 nm using a Synergy  
307 H1Multi-Mode Plate Reader (Bio Tek). The amount of free thiols detected in each sample was calculated  
308 using the regression curve obtained from the glutathione standards and dividing by the concentration of the  
309 sample.

310

311 **Cysteine labeling for mass spectrometry**

312 The recombinant protein samples were first prepared by exchanging the T200 buffer for PBS. The protein  
313 concentrations were measured and adjusted to 10  $\mu\text{M}$  using PBS. Stock solutions of 500 mM DTT, 100  
314 mM iodoacetamide (IAA), 100 mM hydrogen peroxide and 250 mM ethylenediaminetetraacetic acid  
315 (EDTA) were prepared in PBS. A stock of 500 mM N-ethyl-maleimide (NEM) was prepared in ethanol  
316 immediately before use. For the first optimization and comparison of IAA and NEM labelling (*i.e.*,  
317 Supplementary Table 2), r-parkin was treated with 2 mM DTT for 30 min at 37°C followed by incubation  
318 with 5 mM IAA or 85 mM NEM for 2 h at 37°C. The stepwise Cys labeling procedure was as follows: A  
319 10  $\mu\text{L}$  aliquot of protein (at 10  $\mu\text{M}$ ) was reacted with hydrogen peroxide at various concentrations, as  
320 indicated (Table 1) for 30 min (and up to 60 min) at 37°C as indicated. Any unreacted cysteines were

*Parkin Insolubility in Human Midbrain is Linked to Redox Balance*

321 alkylated with incubation with 5 mM IAA (either with or, in some runs, without 10 mM EDTA) for 2 hrs at  
322 37°C. Previously oxidized cysteines were then reduced by treatment with 40 mM DTT for 30 min at 37°C.  
323 Newly reduced cysteines were alkylated by incubation with 85 mM N-ethyl maleimide (NEM) for 2 hrs at  
324 37°C. The samples were separated on SDS-PAGE using Laemmli buffer containing 100 mM DTT and  
325 proteins visualized using Coomassie staining. Appropriate bands were excised and analyzed by liquid  
326 chromatography mass spectrometry (LC-MS/MS).

327

328 **Protein identification by LC-MS/MS**

329 Proteomics analysis was performed at the Ottawa Hospital Research Institute Proteomics Core Facility  
330 (Ottawa, Canada). Proteins were digested in-gel using trypsin (Promega) according to the method of  
331 Shevchenko [46]. Peptide extracts were concentrated by Vacufuge (Eppendorf). LC-MS/MS was  
332 performed using a Dionex Ultimate 3000 RLSC nano HPLC (Thermo Scientific) and Orbitrap Fusion  
333 Lumos mass spectrometer (Thermo Scientific). MASCOT software version 2.6.2 (Matrix Science, UK) was  
334 used to infer peptide and protein identities from the mass spectra. For detection of dopamine metabolites on  
335 Parkin, the following variable modifications were included: 5,6-indolequinone (+C<sub>8</sub>O<sub>2</sub>NH<sub>3</sub>, m/z shift  
336 +145), aminochrome (+C<sub>8</sub>O<sub>2</sub>NH<sub>5</sub>, +147), aminochrome +2H (+C<sub>8</sub>O<sub>2</sub>NH<sub>7</sub>, +149), and dopamine quinone  
337 (+C<sub>8</sub>O<sub>2</sub>NH<sub>9</sub>, +151). These samples were prepared for analysis without any use of dithiothreitol or  
338 iodoacetamide. The observed spectra were matched against human sequences from SwissProt (version  
339 2018-05) and also against an in-house database of common contaminants. The results were exported to  
340 Scaffold (Proteome Software, USA) for further validation and viewing. Analysis of the holoprotein and of  
341 three runs of H<sub>2</sub>O<sub>2</sub>-exposed r-parkin (Supplemental Table 2) were performed at the University of Western  
342 Ontario. There, samples were run on a QToF Ultima mass spectrometer (Waters) equipped with a Z-spray  
343 source and run in positive ion mode with an Agilent 1100 HPLC used for LC gradient delivery (University  
344 of Western Proteomics Facility).

345

346 **MaxQuant analysis of mass spectrometry data**

347 For applicable experiments, the raw MS data files were further processed with MaxQuant software version  
348 1.6.5 and searched with the Andromeda search engine[47]. The reference fastas were set to uniprot-human  
349 (version 2019-02-12) and uniprot-ecoli. The E. coli proteome was included to account for bacterial proteins  
350 present in the recombinant protein samples. The ‘second peptides’ and ‘match between runs’ settings were  
351 enabled. All other settings were left as default. Selected variable modifications included oxidation (Met),  
352 acetylation (protein N-terminus), and carbamidomethyl (Cys), as well as custom modifications for pyro-  
353 carbamidomethyl (N-terminal Cys), N-ethylmaleimide (Cys), and NEM+water (Cys). For data analysis,  
354 site-level intensity values were obtained from the MaxQuant-generated “CarbamidomethylSites” table  
355 which combines the intensity of MS1 signals from all peptides covering a particular cysteine residue.

356

357

358 **Immunoprecipitation (IP) of brain parkin**

359 Conjugation of anti-parkin antibody (Prk8, 808503, lot B209868) and clone A15165-B (this report: Suppl.  
360 Fig. 8c) to magnetic beads at a final concentration of 10 mg of antibody / mL of beads was done following  
361 the Magnetic Dynabeads Antibody Coupling Kit from Invitrogen (14311D). Human tissue lysates were  
362 also prepared using the “Sequential Extraction of Proteins from Tissue” protocol as described above with  
363 addition of 10 mM iodoacetamide prior to homogenization. TS tissue extracts (n=4) and SDS tissue  
364 extracts (n=8) were diluted in TS buffer, resulting in a final SDS concentration of 0.0175 % and 0.05 %  
365 respectively. For the IP, Prk8 conjugated agarose beads were first prepared by multiple washes with 1 mL  
366 of TS buffer using centrifugation (1000 x g at 4°C for 3 min) and adhesion to a strong magnet. Amounts of  
367 Prk8 conjugated agarose beads used for each experiment were approximated based on the amount of parkin  
368 ( $\mu\text{g}$ ) / sample calculated by densitometry when the sample was compared to recombinant parkin protein  
369 standards using Western blotting with Prk8 primary antibody. The mixture was incubated for 16 h at 4°C  
370 with slow rotation. Unbound proteins, which did not bind to the Prk8 conjugated agarose beads, were  
371 separated from the beads by centrifugation (1000 x g at 4°C for 3 min) followed by adhesion to a strong  
372 magnet and saved as the IP “unbound” fraction.

373 Beads from cellular or human IP were washed three times with 900 or 1000  $\mu\text{L}$  respectively of  
374 ice-cold RIPA buffer (1 % nonionic polyoxyethylene-40, 0.1 % SDS, 50 mM Tris, 150 mM NaCl, 0.5 %  
375 sodium deoxycholate, 1 mM EDTA) using centrifugation (1000 x g at 4°C for 3 min) and adhesion to a  
376 strong magnet. Approximately 5- 10  $\mu\text{L}$  of each wash was combined and saved as the IP “wash” fraction.  
377 To elute Prk8 bound proteins, 15-35  $\mu\text{L}$  of 6X reducing Laemmli buffer (30 % SDS, 60 % glycerol, 0.3 %  
378 bromophenol blue, 0.375 M Tris, 100 mM DTT, pH 6.8) was added to the beads and the samples were  
379 boiled for 5 min. Following centrifugation (1000 x g at 4°C for 3 min), the supernatant was transferred to a  
380 fresh tube labeled “IP elute” and the beads were discarded. To assess IP efficiency, eluted fractions (IP  
381 elute), along with controls (input, unbound, wash and recombinant parkin protein standards) were run on  
382 SDS/PAGE and blotted with anti-parkin antibody (MAB5512 or 2132S). Human IP elutes used in  
383 subsequent for mass spectrometry (MS) analysis were incubated with 500 mM N-ethyl maleimide (as  
384 indicated for select runs) for 16 h at 4°C prior to SDS-PAGE and further processing for MS (as described  
385 above). Gel slices corresponding to band sizes 50-75 kDa were excised and analyzed by LC-MS/MS.

386

387 ***In vitro* melanin formation assay**

388 The recombinant protein samples were first prepared by exchanging the T200 protein buffer (50 mM Tris,  
389 200 mM NaCl and 250  $\mu\text{M}$  TCEP, pH 7.5) for T200-TCEP (50 mM Tris and 200 mM NaCl, pH 7.5) using  
390 repeat centrifugations (8 times 4000 x g at 4°C for 10 min) in Amicon Ultra 10 kDa MWCO filters. The  
391 protein concentrations were measured and adjusted to 20  $\mu\text{M}$  using T200-TCEP. A 0.067 M sodium  
392 phosphate buffer, pH 6.0, was prepared by adding 33 mL of 0.1 M sodium phosphate buffer to 17 mL water  
393 and adjusting the pH using HCl. A stock solution of 100 mM dopamine HCl was prepared in 0.067 M

## *Parkin Insolubility in Human Midbrain is Linked to Redox Balance*

394 sodium phosphate buffer and stock solutions of 100 mM reduced glutathione (GSH) and hydrogen peroxide  
395 were prepared in T200-TCEP.

396 Samples and controls were prepared in 100  $\mu$ L total volume and contained: 10  $\mu$ L of 20  $\mu$ M  
397 protein or T200-TCEP, 10  $\mu$ L of 100 mM dopamine or 0.067 M sodium phosphate buffer, 10  $\mu$ L of 100  
398 mM glutathione or T200-TCEP buffer, and 70  $\mu$ L T200-TCEP. The final concentration of protein was 2  
399  $\mu$ M and the final concentration of reagents was all 10 mM. The samples and controls were plated in  
400 triplicate, and absorbance read at 405 and 475 nm every 90 sec for 1 h and up to 4 h.

401

### 402 **1-methyl-4-phenyl-1,2,3,6-tetrahydropyridine (MPTP) treatment**

403 Eight to 12 mths-old WT and *prkn*-null mice were injected intraperitoneally with 40mg/kg of saline or  
404 MPTP and sacrificed an hour later[48]. The brains were harvested for ROS measurement, protein analysis  
405 by Western blot and immunoprecipitation of parkin and mass spectrometry analysis. For mass  
406 spectrometry, the brains harvested were first incubated in IAA prior to homogenization and fractionation as  
407 described above. Brain homogenates were then incubated with anti-parkin conjugated to magnetic beads  
408 (Dynabeads Coupling Kit; Invitrogen). A magnet was used to capture parkin bound to the beads, and  
409 several washes were used to remove unbound proteins. Eluted fractions (IP elute) along with controls  
410 (input, unbound, wash and recombinant parkin protein standards) were run on SDS/PAGE and blotted with  
411 anti-parkin. A sister gel was stained with Coomassie as described above and gel slices corresponding to  
412 band sizes 50-75 kDa were excised and analyzed by LC-MS/MS, as described in detail by Tokarew et al.,  
413 2020.

414

### 415 **Cell cytotoxicity assay**

416 Human neuroblastoma cell line (M17 cells) wild-type, Vector (Myc), P5 (low stable expression of Myc-  
417 parkin) and P17 (high stable expression of Myc-parkin), or WT ectopically overexpressing flag-parkin  
418 (WT), flag vector and flag-parkin carrying the following mutations (p.C431F, p.G328E and p.C95A) were  
419 grown in 6 well culture plates, at  $0.3 \times 10^6$  cell density (80% confluence) in Opti-MEM media (Gibco  
420 11052-021) containing heat inactivated FBS (Gibco 10082-147), Pen/strep/Neo (5mg/5mg/10mg) (Gibco  
421 15640-055), MEM non-essential amino acids (10mM) (Gibco 11140-050) and sodium pyruvate (100mM).  
422 For rescue experiments, flag-vector, flag-parkin, flag-p.G328E, flag-p.C431F and flag-p.C95A-encoding  
423 pCI-neo plasmids were expressed in M17 wild-type cells. There, 4  $\mu$ g of cDNA was transfected using a 1:1  
424 ratio of cDNA: Lipofectamine 2000 (52887, Invitrogen) in OPTI-MEM transfection medium. The cDNA  
425 and Lipofectamine 2000 was first incubated for 20 min at room temperature before being applied directly  
426 to the cells for 1 h at 37°C with 5 % CO<sub>2</sub> followed by direct addition of fresh growth medium. The cells  
427 were incubated another 24 hours at 37°C with 5 % CO<sub>2</sub>.

428 Dopamine hydrochloride (Sigma H8502) 200 mM stock was prepared. The cells were washed with fresh  
429 media once and then incubated with media alone or supplemented with dopamine at final concentrations of  
430 20  $\mu$ M and 200  $\mu$ M for 18-20 hours. Post dopamine stress, media was collected from all wells for

*Parkin Insolubility in Human Midbrain is Linked to Redox Balance*

431 cytotoxicity assay, the cells were harvested and lysed with TS buffer and centrifuged. The supernatant was  
432 collected and saved for Western blot analysis and to assess total cell toxicity signal. The pellet was  
433 suspended in SDS buffer and centrifuged.

434 Vybrant™ cytotoxicity assay kit (Molecular Probes V-23111) was used to monitor cell death  
435 through the release of the cytosolic enzyme glucose 6-phosphate dehydrogenase (G6pPD) from damaged  
436 cells into the surrounding medium. 50 µl of media alone (no cells), media from control and stressed cells  
437 and cell lysates were added to a 96-well microplate. Fifty µl of reaction mixture, containing reaction buffer,  
438 reaction mixture and resazurin, was added to all wells, and the microplate was incubated at 37°C for 30  
439 mins. A microplate reader was used to measure either fluorescence with excitation at 560 nm and emission  
440 at 590 nm. A rise in fluorescence indicates a rise in G6PD levels i.e. a rise in cell death.

441

442 **Immunohistochemistry (IHC)**

443 Immunohistochemistry was performed on paraffin-embedded sections and treated as previously described  
444 [49-51]. Briefly, prior to antibody incubation, sections were deparaffinized in xylene and successively  
445 rehydrated through a series of decreasing ethanol concentration solutions. Endogenous peroxidase activity  
446 was quenched with 3% hydrogen peroxide in methanol, followed by a standard citric acid-based antigen  
447 retrieval protocol to unmask epitopes. Sections were blocked in 10-20% serum in PBS-T to reduce non-  
448 specific signal. Sections were incubated overnight at 4°C in primary antibodies diluted in 1-5% serum in  
449 PBS-T according to the following concentrations: novel anti-parkin mAbs from Biolegend clones D  
450 (BioLegend, A15165D; 1:250), clone E (BioLegend, A15165E; 1:2000), and clone G (1:250), PRK8  
451 (BioLegend, MAB5512; 1:500) as well as anti-LAMP-3/CD63 (Santa Cruz, SC5275; 1:100), anti-LC3B  
452 (Sigma, L7543-200uL; 1:100), anti-VDAC (MitoScience, MSA03; 1:100). Biotinylated secondary  
453 antibodies (biotinylated anti mouse IgG (H+L) made in goat; Vector Labs, BA-9200, biotinylated anti-  
454 rabbit IgG (H+L) made in goat; Vector Labs, BA-1000) were diluted to 1:225 and sections were incubated  
455 for 2 hours at room temperature. The signal was amplified with VECTASTAIN® Elite® ABC HRP Kit  
456 (Vector Labs, PK-6100), and visualized via standard DAB solution, 55mM DAB, or Vina green (Biocare  
457 Medical, BRR807AH), or most commonly metal enhanced DAB (Sigma, SIGMAFAST™ DAB with  
458 Metal Enhancer D0426). Samples were counterstained with Harris Modified Hematoxylin nuclei stain and  
459 dehydrated through a series of increasing ethanol concentration solutions and xylene. Permount (Fisher  
460 Scientific, SP15-100) was used for mounting and slides were visualized with high magnification images via  
461 a Quorum Slide Scanner (Ottawa Hospital Research Institute).

462

463 **Immunofluorescence (IF) and confocal microscopy**

464 Paraffin-embedded human midbrain sections were stained by routine indirect immunofluorescence with the  
465 following details. Antigen retrieval was performed in Tris-EDTA buffer pH 9 for 10 mins. Primary  
466 antibodies were incubated overnight at 4C. Details for primary antibodies anti-Parkin Clone E (1:500), anti-  
467 LAMP3 (1:250) are described above. A 40 minute incubation with the following secondary antibodies was

## *Parkin Insolubility in Human Midbrain is Linked to Redox Balance*

468 performed: goat anti-mouse alexa fluor 488 (1:200), goat anti-rabbit alexa fluor 594 (1:500). Slides were  
469 mounted with fluorescence mounting medium with DAPI. Stained sections were imaged using a Zeiss LSM  
470 880 AxioObserver Z1 with an Airyscan Confocal Microscope then processed and analyzed using Zeiss Zen  
471 and Fiji software.

472

### 473 **Statistical analyses**

474 All statistical analyses were performed using GraphPad Prism version 6 (GraphPad Software, San Diego,  
475 CA, USA, [www.graphpad.com](http://www.graphpad.com)). Differences between two groups were assessed using an unpaired t-test.  
476 Differences among 3 or more groups were assessed using a one-way or two-way ANOVA followed by  
477 Tukey's post hoc corrections to identify statistical significance. Subsequent post hoc tests are depicted  
478 graphically and show significance between treatments. For all statistical analysis a cut-off for significance  
479 was set at 0.05. Data is displayed with p values represented as \*p < 0.05, \*\*p < 0.01, \*\*\*p < 0.001, and  
480 \*\*\*\*p < 0.0001. Linear regression (for continuous dependent variable, e.g., H<sub>2</sub>O<sub>2</sub> level, mRNA level) or  
481 logistic regression (for binary dependent variable, e.g., parkin present in TS fraction) modelling were  
482 performed. Furthermore, to address the effect of age on parkin solubility, receiver operating characteristic  
483 (ROC) curve and area under the ROC curve (AUC) were calculated, as reported [51].

484

### 485 **Results**

#### 486 **Parkin is mostly insoluble in the ageing human brain including the *S. nigra***

487 Parkin's metabolism in the human brainstem vs. other regions has remained largely unexplored [52]. We  
488 serially fractionated 20 midbrain specimens (ages, 26-82 yrs) and >40 cortices (ages, 5-85 yrs) from human  
489 subjects (**Fig. 1, Supplementary Fig. 1; Supplementary Table 1**). In control brain, we found that before  
490 the age of 20 yrs, nearly 50% of cortical parkin was found in soluble fractions generated by salt [Tris-NaCl;  
491 TS]- and mild detergent [Triton X-100; TX]-containing buffers (**Fig. 1a,b; Supplementary Fig.1a**). In  
492 contrast, after age 50 yrs, parkin was found almost exclusively (>90%) in the 2% SDS-soluble (SDS)  
493 fraction and the 30% SDS extract of the final fractionation pellet (P). The same distribution was seen in  
494 adult midbrain (e.g., *S. nigra*; red nucleus), the pons (e.g., *L. coeruleus*), and the striatum (**Fig. 1a,b;**  
495 **Supplementary Fig. 1a-c**).

496 Intriguingly, approximately half of detectable parkin remained soluble in human spinal cord and  
497 skeletal muscle specimens from older individuals (ages, ≥50 yrs) (**Fig. 1c,d**). We used logistic regression  
498 modeling to demonstrate a robust, negative correlation between parkin solubility in human control brain  
499 and age (**Fig. 1e**); the age coefficient was -0.0601 (95% CI: -0.106 to -0.024; P=0.004). The transition to  
500 insoluble parkin occurred between the ages of 28 yrs (at low sensitivity; high specificity values) and 42 yrs  
501 (high sensitivity; low specificity values; **Fig. 1e**).

502 The age-dependent partitioning of parkin was not seen for any other protein examined, including  
503 other PD-linked proteins, e.g., DJ-1 and  $\alpha$ -synuclein (**Fig. 1a,f**) and organelle-associated markers, e.g.,  
504 cytosolic glyoxalase-1, peroxiredoxin-1 and -3; and endoplasmic reticulum-associated calnexin. Notably,

## Parkin Insolubility in Human Midbrain is Linked to Redox Balance

505 mitochondrial markers, *e.g.*, voltage-dependent anion channel (VDAC) and Mn<sup>2+</sup>-superoxide dismutase  
506 (MnSOD), also did not partition with parkin (**Fig. 1g; Supplementary Fig. 1b,c**; and data not shown). In  
507 contrast, parkin did co-distribute with LC3B, a marker of protein aggregation, foremost in the samples from  
508 older individuals (**Fig. 1a,h; Supplementary Fig. 1c**). The age-dependent loss of solubility for parkin was  
509 unique to human brain in that it remained soluble in the nervous system of other aged species, *e.g.*, mice,  
510 rats and cynomolgus monkey, which were processed in the same way (**Fig. 1i**).

511 In soluble fractions from older humans, we did not detect any truncated species of parkin using  
512 several, specific antibodies (data not shown). Despite the loss of parkin solubility with ageing, *PRKN*  
513 mRNA was detectable in individual neurons isolated from the *S. nigra* and cortex throughout all age  
514 groups; there, the transcript levels were independent of age (**Supplementary Fig. 1d,e**).

515 Most important, we also confirmed that parkin insolubility did not correlate with the length of *post*  
516 *mortem* interval (range, 2-74 hrs), as studied in both human and mouse brains (**Fig. 1j-l; Supplementary**  
517 **Fig. 2a,b**), was independent upon sex of the deceased person (not shown), and was not caused by either  
518 tissue freezing prior to protein extraction or the pH of the buffer used (**Supplementary Fig. 2c-f**). Further,  
519 using the commonly used ‘RIPA buffer’ instead of serial extraction buffers resulted in the release of parkin  
520 into the supernatant with some reactivity left in the pellet, as expected (**Supplementary Fig. 2g**).

521

### 522 **The insolubility of brain parkin correlates with rising hydrogen peroxide levels**

523 We explored a possible association between parkin distribution, age and oxidative changes. Using sister  
524 aliquots from the brain specimens examined above, we found that hydrogen peroxide (H<sub>2</sub>O<sub>2</sub>) concentrations  
525 positively correlated with age (**Fig. 2a,b**; see also **Supplementary Table 1**), as expected from the literature  
526 [53]. In three brains of non-*PRKN*-linked cases of parkinsonism, the levels of H<sub>2</sub>O<sub>2</sub> were similar to those of  
527 age-matched controls (**Fig. 2b**). When analyzing parkin distribution *vs.* H<sub>2</sub>O<sub>2</sub> concentrations, we found that  
528 parkin solubility in human brain negatively correlated with H<sub>2</sub>O<sub>2</sub>, where the coefficient of the latter was -  
529 0.939 (95% CI: -2.256 to -0.248; P=0.0415) (**Fig. 2c**).

530 We next sought to validate the correlation between oxidative stress, ROS levels and parkin  
531 solubility in mice. We first used an *ex vivo* approach in which wild-type mouse brain homogenates were  
532 exposed to either saline or H<sub>2</sub>O<sub>2</sub>. There we saw a significant reduction in soluble parkin and an increase in  
533 insoluble parkin in H<sub>2</sub>O<sub>2</sub>-exposed lysates (**Fig. 2d,e**). We next examined two *in vivo* models. First, wild-  
534 type mice were injected intraperitoneally, one hour before sacrificing them, with 40 mg/kg of MPTP toxin  
535 to induce acute oxidative stress, but no cell death [48]. Brains were serially fractionated, and parkin  
536 distribution was quantified across soluble and insoluble compartments. There, we measured a decrease of  
537 murine parkin in the soluble fraction and a corresponding rise in the insoluble fractions of MPTP- *vs.*  
538 saline-injected animals (**Fig. 2f,g**). Second, we observed a similar shift in parkin distribution in adult mice  
539 that were haploinsufficient for the *Sod2* gene, which encodes mitochondrial MnSOD, in the absence of any  
540 exogenous toxin (**Fig. 2h,i**). Of note, in both models we confirmed the rise in H<sub>2</sub>O<sub>2</sub> levels (see below and  
541 El Kodsi *et al.* [38]). In contrast to murine parkin, the solubility of endogenous Dj-1, encoded by a second,

542 ARPD-linked gene, was not visibly affected on SDS/PAGE under these elevated oxidative stress conditions  
543 (**Fig. 2h**).

544

#### 545 **Parkin is reversibly oxidized in adult human brain**

546 The correlation of parkin solubility with H<sub>2</sub>O<sub>2</sub> levels in human control brain suggested that its solubility  
547 could be associated with posttranslational, oxidative modifications. Indeed, in contrast to SDS-containing  
548 brain fractions carried out under reducing conditions (+dithiothreitol, DTT), when gel electrophoresis was  
549 performed under non-reducing (-DTT) conditions, we detected parkin proteins ranging in *M<sub>r</sub>* from >52 to  
550 270 kDa, invariably in the form of redox-sensitive, high molecular weight (HMW) smears (right vs. left  
551 panel; **Fig. 3a**). We saw the same pattern in fractions prepared from control midbrains; no such reactivity  
552 was seen in SDS-extracts of parkin-deficient ARPD brains, thus demonstrating detection specificity.

553 We confirmed that reversible oxidation of brain parkin was also present in soluble (TS-, TX-)  
554 fractions, albeit at lesser intensities (**Fig. 3b**; data not shown). Of note, the formation of high *M<sub>r</sub>* parkin was  
555 not due to secondary oxidation *in vitro*, because specimens were processed and fractionated in the presence  
556 of iodoacetamide (IAA) prior to SDS/PAGE in order to protect unmodified thiols. These HMW parkin  
557 smears also did not arise from covalent ubiquitin-conjugation, such as due to auto-ubiquitylation of parkin,  
558 because such adducts cannot be reversed by reducing agents (*e.g.*, DTT).

559 Because we predicted that the loss in parkin solubility was due to thiol-based, posttranslational  
560 oxidation events [26], we sought to test this *in vitro* using purified, tag-less, full-length, recombinant (r-)  
561 parkin. There, we observed the H<sub>2</sub>O<sub>2</sub> dose-dependent formation of HMW smears and loss of parkin  
562 solubility; however, protein solubility was recovered by adding DTT (**Fig. 3c**; **Supplementary Fig. 3a**) or  
563 β-mercaptoethanol (not shown). Demonstrating its sensitivity to bi-directional redox forces, the exposure  
564 of naïve r-parkin to excess DTT also rendered it increasingly insoluble (**Supplementary Fig. 3b**), likely  
565 due to loss of Zn<sup>2+</sup> ion chelation at its four RING domains [25], which requires a zwitter-type redox state of  
566 their 28 cysteines [54]

567 Further, we also confirmed by mass spectrometry (MS; without any trypsin digestion of the  
568 holoprotein) that all 35 cysteine-based thiol groups of r-parkin are accessible to alkylation by IAA (right vs.  
569 left panel; **Supplementary Fig. 3c**). These results unequivocally demonstrated that each parkin cysteine  
570 theoretically possesses the capacity to function as a reducing thiol. Nevertheless, in these *in vitro*  
571 experiments we consistently observed a concentration-dependent change in r-parkin solubility, thereby  
572 suggesting that some thiols were more amenable than others to modification by reactive species (see below  
573 and **Supplementary Table 2**).

574

#### 575 **Oxidative conditions alter parkin structure**

576 The progressive insolubility of brain parkin and r-parkin due to redox stress suggested that the protein had  
577 undergone structural changes. Indeed, when we analyzed the effects of spontaneous oxidation using naïve  
578 r-parkin by far-UV-circular dichroism (**Fig. 3d**), soluble fractions initially contained both α-helically



*Parkin Insolubility in Human Midbrain is Linked to Redox Balance*

579 ordered as well as unstructured r-parkin proteins. Five days later, r-parkin preparations were separated by  
580 centrifugation and fractions re-analyzed. There, we found a marked shift to increased  $\beta$ -pleated sheet-  
581 positive r-parkin in insoluble fractions (**Fig. 3d**). Similarly, when we monitored r-parkin during  
582 spontaneous oxidization using dynamic-light scattering (**Supplementary Fig. 3d**), we observed a gradual  
583 shift in the hydrodynamic diameter from 5.1 nm, representing a folded monomer, to multiple peaks with  
584 larger diameters 5 hrs later. The latter indicated spontaneous multimer formation, which was partially  
585 reversed by the addition of DTT (right panel; **Supplementary Fig. 3d**). Thus, these structural and  
586 solubility changes of r-parkin were congruent with our immunoblot results for human brain parkin (**Fig.**  
587 **3a**).

588

### 589 **Hydrogen peroxide modifies parkin at multiple cysteines**

590 To determine whether oxidation of cysteines and/or methionine residues caused parkin insolubility, we  
591 analysed r-parkin that was treated with and without H<sub>2</sub>O<sub>2</sub> and/or thiol-alkylating agents using liquid  
592 chromatography-based MS (LC-MS/MS). To differentiate reduced from oxidized cysteines we used a serial  
593 thiol-fingerprinting approach (**Fig. 3e**), which labelled reduced thiols with IAA; it and the tagging of  
594 reversibly oxidized thiols with N-ethylmaleimide (NEM) after their prior reduction with DTT (**Fig. 3e**).  
595 The first test was to determine how progressive oxidation affected thiol-accessibility. As expected, using  
596 the strong alkylating agent IAA on the nascent protein, we found that the majority of parkin cysteines were  
597 reactive (**Supplementary Fig. 3c; Supplementary Table 2**).

598 However, when treating naïve r-parkin with lower H<sub>2</sub>O<sub>2</sub> concentrations, we identified an average  
599 of 19 cysteines (54.3%); in contrast, higher H<sub>2</sub>O<sub>2</sub> concentrations increased this number to 32 cysteines  
600 (91.4%). These results suggested progressive protein unfolding with increasing oxidation (**Supplementary**  
601 **Table 2**).

602 Next, we sought to more precisely identify the number and pinpoint the location of oxidized  
603 cysteine residues. Using Scaffold PTM-software, we found a rise in the number of oxidized residues  
604 (NEM-Cys, range of 3-26), which was proportional to the increase in H<sub>2</sub>O<sub>2</sub> concentrations and appeared to  
605 begin in the RING1 domain at three residues, *i.e.*, Cys238, Cys241 and Cys253 (**Supplementary Table 2;**  
606 **Fig. 3i**), but also involved Cys95 in the linker domain (**Fig. 3h**). Furthermore, when quantifying thiol  
607 modifications by MaxQuant software [47], we found a significant drop for the number of cysteines in the  
608 reduced state (IAA-cysteines) within the H<sub>2</sub>O<sub>2</sub>-treated samples (P=0.0016; **Fig. 3f**), as expected.

609 In accordance, when comparing cysteine oxidation events in soluble and insoluble fractions of  
610 untreated *vs.* oxidized r-parkin preparations, the number of IAA-Cys was significantly decreased in the  
611 pellets (P<0.0001; **Fig. 3g**). Of note, modifications at methionine residues did not correlate with r-parkin  
612 solubility. These collective results unequivocally demonstrated that H<sub>2</sub>O<sub>2</sub>-induced oxidation of cysteine-  
613 based thiols is linked to both progressive, structural change and the insolubility of human r-parkin.

614

615

616 **Parkin is also irreversibly oxidized in adult human and mouse brain**

617 We next sought to confirm oxidation of parkin cysteine residues *in vivo* by LC-MS/MS. To this end, we  
618 examined both human cortex-derived parkin and parkin isolated from intraperitoneally, MPTP toxin- (vs.  
619 saline-) treated murine brains (**Fig. 4**). Specimens were processed with IAA during homogenization and  
620 fractionation to prevent any oxidation artefacts *post mortem*. Following immunoprecipitation and gel  
621 excision of endogenous parkin at the 50-53 kDa range (an example is shown in **Supplementary Fig. 4a,b**),  
622 we focused on cysteine mapping and the identification of thiol redox states (**Fig. 4a**). A graphic  
623 representation of theoretically possible, thiol-based redox modifications is provided in **Supplementary Fig.**  
624 **4c**).

625 In human control cortices (n=12 runs; summarized in **Fig 4a**), we mapped a mean of 46.8 and  
626 19.4% of parkin wild-type sequence in the soluble and insoluble fractions, respectively. There, we found  
627 cysteines in either a redox reduced state (IAA-alkylated Cys+57; examples shown in **Fig. 4b,d**) or in  
628 oxidized states (*e.g.*, to sulfonic acid Cys+48). Irreversible oxidation events in human cortex occurred, for  
629 example, at Cys95 (**Fig. 4c**) and Cys253 (**Fig. 4e**). The relative frequencies of detection for parkin thiols  
630 that were reduced *in vivo* (and alkylated by IAA *in vitro*) in the soluble vs. insoluble fractions of human  
631 brain were 67.3 and 38.1%, respectively (**Fig. 4a**).

632 Likewise, in saline- and MPTP-treated mouse brains (n=6 runs), we mapped 25 and 51.5 per cent  
633 of parkin, respectively (summarized in **Fig. 4a**). Interestingly, like in the human studies, in these runs we  
634 identified the murine-corresponding residue Cys252 in either a reduced or irreversibly oxidized states (**Fig.**  
635 **4f,g**). As mentioned, mice do not carry a cysteine at residue 95 (for sequence comparison, see below). The  
636 relative frequencies of detection for thiols that were reduced *in vivo* (and alkylated by IAA *in vitro*) in  
637 parkin from saline- vs. MPTP toxin-treated mouse brains were 92.9 and 68.2%, respectively (**Fig. 4a**). We  
638 concluded from these analyses that the decline in the relative number of reduced thiols in less soluble  
639 fractions of mammalian brain reflected a greater degree of oxidative, posttranslational modifications of  
640 wild-type parkin.

641

642 **Parkin thiols reduce hydrogen peroxide**

643 A typical redox reaction involves the reduction of an oxidized molecule in exchange for oxidation of the  
644 reducing agent that occurs in parallel (**Supplementary Fig. 4c**). We asked whether parkin oxidation  
645 resulted in reciprocal reduction of its environment, *i.e.*, anti-oxidant activity (**Fig. 5; Supplementary Fig.**  
646 **5**). Using r-parkin, we confirmed that parkin could directly lower H<sub>2</sub>O<sub>2</sub> levels in a concentration-dependent  
647 manner *in vitro* (**Fig. 5a; Supplementary Fig. 5h**). This reducing activity was not enzymatic, in that it did  
648 not mirror the dynamics of catalase, and r-parkin did not possess peroxidase activity (**Fig. 5a;**  
649 **Supplementary Fig. 5a**). Rather, the reaction was dependent on thiol integrity, because pre-treatment with  
650 NEM (or IAA) and pre-oxidation of the protein with H<sub>2</sub>O<sub>2</sub> abrogated the ROS-reducing activity of r-parkin  
651 (**Fig. 5b; Supplementary Fig. 5b,g**).

## *Parkin Insolubility in Human Midbrain is Linked to Redox Balance*

652 This effect by r-parkin was also dependent on its intact Zn<sup>2+</sup> coordination (**Supplementary Fig.**  
653 **5c**). Interestingly, RNF43 (another E3 ligase that contains a zinc-finger domain), HOIP (an E3 ligase  
654 containing a RING domain) and bovine serum albumin (BSA, which akin to parkin has 35 cysteines), did  
655 not show any H<sub>2</sub>O<sub>2</sub>-lowering capacity (**Fig. 5c,d; Supplementary Fig. 5d**). Further, PD-linked  $\alpha$ -  
656 synuclein, which has no cysteines, also had no reducing effect (**Fig. 5c,d**). These results suggested that the  
657 cysteine-rich, primary sequence and the tertiary structure of r-parkin can confer anti-oxidant activity.

658 We next examined additional cysteine-containing, PD-linked proteins, *e.g.*, r-DJ-1, a C-terminal  
659 RING2-peptide of parkin (r-parkin<sub>321C</sub>), and two disease-linked variants of full-length r-parkin, p.G328E  
660 and p.C431F. We also used a second ROS quantification assay for further validation and to examine dose  
661 dependency (**Fig. 5e, Supplementary Fig. 5e-l**). There, r-DJ-1 and r-parkin<sub>321C</sub> showed negligible H<sub>2</sub>O<sub>2</sub>-  
662 lowering capacity, and the two point-mutants conferred less activity than did wild-type, human r-parkin  
663 (**Fig. 5e**). As expected (**Supplementary Fig. 4c**), the lowering of ROS correlated with reciprocal r-parkin  
664 oxidation, as revealed by SDS/PAGE, which was performed under non-reducing conditions immediately  
665 after the reaction (**Supplementary Fig. 5m**).

666 These results suggested that anti-oxidant activity by parkin was dependent on its reactive thiol  
667 content, which we examined next using the Ellman's reagent. There, wild-type r-parkin, r-parkin<sub>321C</sub> (that  
668 contains two, non-RING-based cysteines) and r-DJ-1 showed the predicted number of reactive thiols,  
669 whereas the single point-mutant variants of r-parkin revealed fewer accessible thiols (**Fig. 5f**). From these  
670 results, we were able to calculate a linear correlation between thiol equivalencies and the degree of ROS  
671 reduction, demonstrating that a greater number of reactive and/or a greater number of accessible thiols in  
672 parkin proteins correspond well with more effective lowering of H<sub>2</sub>O<sub>2</sub> (**Fig. 5g**).

673

### **Hydrogen peroxide levels are increased in parkin-deficient brain**

674 To explore whether parkin oxidation conferred ROS reduction *in vivo*, we first quantified H<sub>2</sub>O<sub>2</sub>  
675 concentrations in the brains of wild-type and *prkn*<sup>-/-</sup> mice. A trend, but no significant difference, was  
676 observed under normal redox equilibrium conditions. However, when analyzing brain homogenates from  
677 mice treated with MPTP toxin *vs.* saline, as described above (Fig. 2), we found significantly higher H<sub>2</sub>O<sub>2</sub>  
678 levels in the brains of adult *prkn*<sup>-/-</sup> mice compared to wild-type littermates (P<0.001; **Fig. 5h**). Similarly, in  
679 adult humans H<sub>2</sub>O<sub>2</sub> levels were significantly increased in the cortex of *PRKN*-linked ARPD patients *vs.*  
680 age-, *post mortem* interval-, ethnicity- and brain region-matched controls [1] (P<0.05; **Fig. 5i**). Specimens  
681 of three non-*PRKN*-linked cases with parkinsonism showed H<sub>2</sub>O<sub>2</sub> levels comparable to those from age-  
682 matched normal cortices (Fig. 2b, red circles). We concluded that the expression of wild-type *PRKN*  
683 contributes to the lowering of ROS concentrations in adult, mammalian brain.

684

### **Parkin prevents dopamine toxicity in part by lowering hydrogen peroxide**

685  
686 To address the question of selective neuroprotection, we revisited the role of parkin in cellular dopamine  
687 toxicity studies [34, 55]. We first tested its effect on ROS concentrations in dopamine-synthesizing, human  
688

*Parkin Insolubility in Human Midbrain is Linked to Redox Balance*

689 M17 neuroblastoma cells. There, dopamine exposure of up to 24 hrs caused a significant rise in  
690 endogenous H<sub>2</sub>O<sub>2</sub> (P<0.05; **Fig. 5j**), as expected. Wild-type parkin expression effectively protected M17  
691 cells against the dopamine stress-related rise in H<sub>2</sub>O<sub>2</sub> levels (P<0.0001; **Fig. 5j**). By comparing sister  
692 cultures that expressed similar amounts of exogenous parkin proteins, the E3 ligase-inactive p.C431F  
693 mutant had a partial rescue effect, whereas p.G328E, which we confirmed to retain its E3 ligase activity *in*  
694 *vitro*, showed no H<sub>2</sub>O<sub>2</sub>-lowering capacity in cells (**Fig. 5j**; and data not shown).

695 Under these conditions, only wild-type parkin, but none of the mutant variants we tested,  
696 increased M17 cell viability under rising dopamine stress conditions (P<0.01; **Fig. 5k**; and data not shown).  
697 This protective effect also correlated with parkin insolubility and HMW smear formation, as expected from  
698 previous studies [34]. These posttranslational changes in M17-expressed parkin were not reversible by  
699 DTT or SDS (**Supplementary Fig. 6a,b**), thereby suggesting irreversible dopamine-adduct formation.  
700 Notably, the protection from dopamine toxicity positively correlated with the level of *PRKN* cDNA  
701 transcribed, as confirmed in sister lines of M17 cells that stably express human parkin. There, we estimated  
702 that ~4 ng of parkin protein expressed in healthy, neural cultures neutralized each μM of dopamine added  
703 during up to 24 hrs (**Supplementary Fig. 6c,d**).

704

705 **Parkin binds dopamine radicals predominantly at primate-specific cysteine 95**

706 We next explored which thiols of parkin were relevant for the neutralization of dopamine radicals.  
707 Covalent conjugation of RES metabolites at parkin residues had been previously suggested [34, 55], but not  
708 yet mapped by LC-MS/MS examining the whole protein. Aliquots of r-parkin were exposed to increasing  
709 levels of the relatively stable dopamine metabolite aminochrome. As expected, this led to the loss of  
710 protein solubility and HMW species formation at the highest dose tested (**Fig. 6a,b**). These reaction  
711 products were then used to map modified residues by LC-MS/MS. Specifically, proteins corresponding to  
712 r-parkin monomer (51-53 kDa) and two HMW bands, one at ~100 kDa, the other near the loading well,  
713 were gel-excised (**Fig. 6a**), trypsin digested and further analyzed.

714 There, we made the following four related observations: i) Increasing aminochrome concentrations  
715 led to a significant decline in the total number of spectra readily identified as parkin-derived peptides, both  
716 in the monomeric and HMW bands (P<0.001 and P<0.0001), respectively (**Fig. 6c**). This indicated to us  
717 either a marked loss in solubility or a rise in heterogenous, complex modifications, which rendered the  
718 analyte undetectable by LC-MS/MS, or both; ii) Despite fewer spectra recorded, we identified a significant  
719 increase in oxidized cysteines (*e.g.*, irreversibly to sulfonic acid) following aminochrome exposure, in  
720 particular within the HMW bands of r-parkin (P<0.0001; **Fig. 6d**); iii) Under these conditions, four distinct  
721 forms of dopamine metabolites were found conjugated to parkin cysteines. Mass shifts of +145, +147, +149  
722 and +151 were found, which represented conjugation to indole-5,6-quinone, two variants of aminochrome  
723 (O=; HO-), and dopamine quinone itself, respectively (**Fig. 6e**; **Supplementary Fig. 7a**); and iv)  
724 Unexpectedly, we identified Cys95 to be the most frequently dopamine-conjugated parkin residue  
725 (P<0.0001; n=98 spectra; **Fig. 6e-g**; **Supplementary Fig. 7b-g**). Other residues of r-parkin identified

*Parkin Insolubility in Human Midbrain is Linked to Redox Balance*

726 carrying dopamine metabolite adducts included Cys166, Cys169, Cys212, Cys238, Cys360, Cys365 and  
727 Met80 (all together, n=11 spectra; **Fig. 6e**; **Supplementary Fig. 7h-o**). No dopamine metabolite-related  
728 mass shifts were detected in control samples that had not been exposed to aminochrome, as expected.

729

730 **Parkin augments melanin formation *in vitro*, which requires primate-specific Cys95**

731 Given the observed relations between r-parkin, dopamine radical conjugation, aggregate formation and  
732 protein insolubility, we next examined whether melanin formation was altered in the presence of parkin.  
733 Oxidation of dopamine, in the presence of proteins containing cysteine groups, generates covalent adduct-  
734 carrying proteins that share important structural characteristics of neuromelanin pigment in the human  
735 midbrain. Additionally, such synthetic versions behave similarly to human neuromelanin in cell cultures  
736 [56, 57]. Unexpectedly, we discovered that wild-type r-parkin augmented total melanin formation in a  
737 protein concentration- and time-dependent manner (**Fig. 7a**). Like the wild-type protein, two ARPD-linked,  
738 full-length r-parkin variants, p.C431F and p.G328E, also augmented melanin formation *in vitro*, when  
739 monitored over 60 mins, whereas r-DJ-1 and BSA had no such effect in this assay (**Fig. 7b**).

740 Interestingly, mutating residue Cys95 to alanine (p.C95A; **Fig. 7c**) completely abrogated the  
741 enhancing effect by r-parkin on the polymerization of melanin (**Fig. 7d,e**). Of note, in our study all  
742 recombinant proteins heretofore analyzed were used after their N-terminal His-SUMO-tag had been  
743 removed; however, the p.C95A-mutant was resistant to enzymatic digestion of the tag from the holoprotein.  
744 Therefore, both His-SUMO-r-parkin and His-SUMO p.C95A were utilized (**Fig. 7c-e**). Importantly, we  
745 saw no difference in the kinetics of melanin formation between wild-type r-parkin proteins that either  
746 carried a His-SUMO-tag or were tag-less (not shown).

747 Furthermore, when testing p.C95A-mutant parkin in the M17 cell-based dopamine toxicity assay,  
748 the variant showed only a partial effect in H<sub>2</sub>O<sub>2</sub> lowering when compared to wild-type parkin, even when  
749 p.C95A was expressed at higher levels (**Fig. 7f,g**). These results were consistent with our collective LC-  
750 MS/MS results of oxidative modifications of parkin at Cys95 (shown in: **Figs. 3h**; **4c**; **Supplementary**  
751 **Table 2**). We reasoned from these collective *ex vivo* results that wild-type parkin could be associated with  
752 the synthesis of neuromelanin *in vivo*. Therefore, we sought to explore this further in dopamine neurons of  
753 human midbrain.

754

755 **Anti-parkin reactivity localizes to neuromelanin in *S. nigra* of adult control brain**

756 Subcellular localization studies of parkin in adult human control brain had previously been hindered by the  
757 lack of renewable antibodies (Abs) that reliably detect the protein *in situ* [49, 52, 58, 59]. We therefore  
758 developed and extensively validated several, epitope-mapped, monoclonal Abs of the IgG<sub>2</sub>b-subtype using  
759 preparations of untagged full-length, human r-parkin as immunogen. To this end, we generated four stable  
760 clones, *i.e.*, A15165B, A15165D, A15165G, and A15165E (**Supplementary Fig. 8a-c**; Tokarew et al., *in*  
761 *preparation*), which were applied to microscopy studies.

*Parkin Insolubility in Human Midbrain is Linked to Redox Balance*

762 Serial sections of control adult, human midbrains were developed by traditional  
763 immunohistochemistry (IHC) using enhanced 3-3'-diaminobenzadine (eDAB) generating a black signal.  
764 There, anti-parkin clones A15165D, A15165G and A15165E revealed dark, granular staining throughout  
765 the cytoplasm of pigmented cells (ages,  $\geq 55$  yrs) (**Fig. 8a,b,d**). Using sections of anterior midbrains from  
766 nine adult control subjects,  $\geq 83\%$  of the anti-tyrosine hydroxylase (TH)-positive neurons were also positive  
767 for parkin, as quantified by double labelling (**Fig. 8c**). Under these conditions and Ab concentrations, no  
768 anti-parkin signal was detected in glial cells.

769 Intriguingly, sections from younger control subjects (ages,  $\leq 33$  yrs) that were processed in parallel  
770 revealed less intense, anti-parkin reactivity in *S. nigra* neurons, which matched the paucity of their  
771 intracellular pigment (**Fig. 8e**); of note, mature neuromelanin consistently generates a brown color in  
772 sections developed without any primary Ab. The difference between younger vs. older midbrains suggested  
773 that the three anti-parkin clones likely reacted with an age-related, modified form of parkin *in situ*, because  
774 the *PRKN* gene is already expressed in dopamine cells at a young age (**Fig. 1b**; **Supplementary Fig. 1a-d**).

775 To confirm the specificity of the new anti-parkin clones, we serially stained midbrain sections  
776 from a 71 yr-old, male ARPD patient, who was entirely deficient in parkin protein due to compound  
777 heterozygous deletions of *PRKN* exons 2 and 3 (**Fig. 8f**; **Supplementary Fig. 9a-c**). Development of serial  
778 sections with anti-parkin clones A15165E, -D and -G revealed no immunoreactivity in surviving midbrain  
779 neurons of the *S. nigra* from this ARPD case. In the absence of parkin, there was no signal overlap between  
780 eDAB reactivity (black color) and either intracellular neuromelanin granules in surviving dopamine cells or  
781 with extracellular pigment (brown; **Fig. 8f**; **Supplementary Fig. 9c**). In parallel, development of midbrain  
782 sections from individuals with the diagnoses of dementia with Lewy bodies, of non-*PRKN*-linked, sporadic  
783 PD as well as of cases with incidental Lewy bodies readily demonstrated eDAB reactivity overlapping with  
784 neuromelanin for all three anti-parkin clones (**Supplementary Fig. 9d-g**; and data not shown). These  
785 results demonstrated specific staining by the three anti-parkin clones in our microscopy studies of *post*  
786 *mortem* human brain.

787

788 **Parkin frequently localizes to LAMP-3<sup>+</sup>-lysosomes within *S. nigra* neurons**

789 Neuromelanin granules have been shown to occur in specialized autolysosomes[60]. When screening for  
790 co-localization of parkin reactivity with markers of subcellular organelles in sections of adult control brain,  
791 we detected that immunofluorescent signals by anti-parkin (green) and anti-CD63/LAMP-3 (red) antibodies  
792 strongly overlapped with pigmented granules of nigral neurons (**Fig. 8g-i**; see also **Supplementary Fig.**  
793 **9h**).

794 Using confocal microscopy, we demonstrated that in adult midbrain anti-parkin signals, as  
795 generated by clone A15165E, and neuromelanin granules were frequently surrounded by circular,  $\sim 2 \mu\text{M}$   
796 (diameter)-sized rings of anti-LAMP-3 reactivity (**Fig. 8i,j**). A z-stack video for the parkin and LAMP-3  
797 co-labelling studies is appended (**Supplemental Information**). We concluded that in the adult, human  
798 midbrain from neurologically healthy controls and in subjects, who suffer from parkinsonism that is not

*Parkin Insolubility in Human Midbrain is Linked to Redox Balance*

799 linked to bi-allelic *PRKN* deletion, a pool of parkin appears physically associated with neuromelanin  
800 pigment in close association with lysosomal structures.

801

802 **Discussion**

803 Here, we demonstrate that the state of parkin's cysteines is linked to its age-related insolubility and redox  
804 homeostasis in human brain. Our study provides first insights into the metabolism of wild-type parkin in  
805 adult midbrain, where we discovered -and quantified- that >90% of detectable parkin is insoluble. The loss  
806 in parkin solubility in the brain is unique, when compared to other PD-linked proteins and mitochondrial  
807 constituents tested. It is also tissue and species-specific. Approximately 50% of parkin remained soluble in  
808 spinal cord and skeletal muscle from aged human donors, and its insolubility was not observed in aged  
809 rodent and adult monkey brain (**Fig. 1, Supplementary Figs. 1,2**).

810 In human brain, the loss of parkin solubility correlated with a rise in H<sub>2</sub>O<sub>2</sub> concentrations and with age.  
811 The transition to insolubility in the cortex occurs between 28 and 42 yrs (**Figs. 1,2,4; Supplementary**  
812 **Table 1**); the age at which parkin transitions in the *S. nigra* will require a larger number of midbrain  
813 specimens from young, neurologically normal subjects. While we were unable to assess solubility in such  
814 midbrains (<20 yrs), parkin's distribution in adult midbrain was the same as in cortices. In brainstem  
815 nuclei, parkin partitioning across fractions was not affected by disease state (controls (n=11) vs.  
816 neuropathological cases (n=9); **Fig. 1b; Supplementary Table 1**), although its total abundance was lower  
817 in the *S. nigra* of cases from subjects with neurodegenerative parkinsonism, as expected (not shown).

818 We demonstrate that the observed loss of parkin solubility occurs via thiol-oxidation and that these  
819 post-translational modifications are linked to three protective outcomes: i) the neutralization of otherwise  
820 toxic reactive species (ROS, RES); ii) the net reduction of H<sub>2</sub>O<sub>2</sub>; and iii) the strong possibility that parkin  
821 has a role in dopamine metabolism through enhanced, Cys95-linked melanin formation. We have modeled  
822 parkin's redox chemistry-based function *in vitro*, in cells and in mice, and provide evidence that these  
823 outcomes are physiologically relevant to human brain. From these observations we propose that insoluble  
824 parkin proteins represent functionally important metabolites of the ageing human brain including those of  
825 the *S. nigra*. Further, our findings integrate the early literature related to parkin mutations and stress-  
826 induced modifications *vis a vis* its insolubility and aggregate formation, which included a wide range of  
827 complementary investigations [27, 28, 33, 55, 61-66], such as findings from induced pluripotent stem cell-  
828 derived, human dopamine neurons [67-69]. Our discovery of parkin's function in redox homeostasis also  
829 helps explain seemingly disparate evidence of previous observations made in flies, mice [19, 20] and  
830 humans [52].

831 The reactivity of cysteines is governed by their redox state (oxidized vs. reduced). It is influenced by  
832 the surrounding electrostatic environment, including via the charges of neighbouring residues [70]. Unlike  
833 parkin, 34 out of 35 cysteines found in BSA are engaged in disulphide-bond formation [71, 72]; it follows,  
834 that BSA was not able to reduce H<sub>2</sub>O<sub>2</sub> *in vitro*, nor did it enhance the formation of insoluble melanin *in*  
835 *vitro*. Two other Zn<sup>2+</sup>-coordinating, cysteine-containing proteins that we tested, RNF43 and HOIP<sup>CD</sup> (**Fig.**

*Parkin Insolubility in Human Midbrain is Linked to Redox Balance*

836 **5c**), also failed to lower H<sub>2</sub>O<sub>2</sub>, thus suggesting that select cysteines in parkin have a higher affinity for ROS  
837 and, as discussed below, RES molecules. When mapping the redox state of parkin cysteines under  
838 progressively pro-oxidant conditions, we found that Zn<sup>2+</sup>-coordinating residues are not protected from ROS  
839 modification[73] (**Supplementary Table 2**).

840 In our experiments, we also estimated the levels of pro- vs. anti-oxidant forces. There, the ratio of  
841 H<sub>2</sub>O<sub>2</sub>-to-r-parkin (0.1-1 mM of H<sub>2</sub>O<sub>2</sub> : 1 ng of r-parkin) was within the physiological range of what we  
842 calculated for human control brain extracts (*i.e.*, 0.4- 6 mM of H<sub>2</sub>O<sub>2</sub> : 1 ng of parkin). In human brain  
843 extracts, H<sub>2</sub>O<sub>2</sub> concentrations were calculated to lie between 700 and 9,100 μM/mg of tissue (see  
844 **Supplementary Table 1**) and total parkin protein concentrations were estimated to be ~1.42 ng/mg brain  
845 tissue using r-parkin dilutions as standards; these had been run in parallel with brain lysates to demonstrate  
846 specificity and perform semiquantitative Western blots. To our knowledge, these estimates represent the  
847 first assessment of the concentration of wild-type parkin in adult mammalian brain.

848 As observed in r-parkin, we also found cysteine residues oxidized in parkin proteins after their affinity  
849 isolation from human control cortices and mouse brains, including of Zn<sup>2+</sup>-binding ones. For example,  
850 Cys253 (Cys252 in mice), which helps coordinate Zn<sup>2+</sup> within parkin's RING1 domain, was frequently  
851 identified by us as being oxidized (**Fig. 3i**; **Fig. 4e,g**). We predict that variable modifications of non-Zn<sup>2+</sup>-  
852 coordinating residues in human parkin, such as of Cys95, which is located in the - heretofore structurally  
853 understudied - linker region, or Cys59, as positioned in its ubiquitin-like (UbL) domain[38], could induce  
854 early, conformational changes in parkin's tertiary structure (see **Figs. 6,7**). Such changes could profoundly  
855 affect parkin function mediated by other domains, as has been shown in several studies involving its E3  
856 ligase activity as a readout following modifications in the UbL domain [27, 29-31, 34, 55, 74-76] (and  
857 reviewed in Yi *et al.* [77]). Our results do not exclude the possibility that other non-thiol-based,  
858 posttranslational modifications alter parkin solubility, such as phosphorylation at Ser65 [78], or at Ser77  
859 [38], which we found in MPTP-treated murine brain (not shown).

860 As mentioned above, *PRKN*-linked ARPD is pathologically restricted to catecholamine producing  
861 cells of the brainstem [3, 79-82]. Dopamine neurons of the *S. nigra* have unique biophysical properties that  
862 lead to high bioenergetic demands and the related rise in oxidative stress [83]. Further, unlike in other  
863 animals, dopamine is not completely catabolized in human brain, and neuromelanin is thought to be  
864 essential for the sequestration and long-term storage of its otherwise toxic metabolites [16]. We found  
865 parkin to be involved in mitigating two well-established, PD-linked stressors (*i.e.*, ROS; dopamine  
866 radicals), which is indirectly supported by our findings in human brain.

867 We show that parkin functions as a classical redox molecule that is able to lower H<sub>2</sub>O<sub>2</sub> in a thiol-  
868 dependent manner. In the absence of wild-type parkin, H<sub>2</sub>O<sub>2</sub> concentrations are elevated in human brain  
869 (**Fig. 5i**), in dopaminergic cells (**Fig. 5j,k**) and in brains from mice exposed to MPTP-toxin (**Fig. 5h**).  
870 There, acute MPTP exposure also correlated with the loss of parkin solubility and oxidation of its cysteines  
871 (**Fig. 4a**). Hence, *PRKN* expression contributes to the net reduction of H<sub>2</sub>O<sub>2</sub> levels *in vivo*.



*Parkin Insolubility in Human Midbrain is Linked to Redox Balance*

872 Because both MPTP toxin exposure and *Sod2* gene function affect mitochondrial integrity [84, 85], we  
873 reason that redox homeostasis in the cytosol, as coregulated by parkin oxidation, could also indirectly  
874 influence the health of mitochondria, in addition to E3 ligase-associated mitophagy (and MITAP). Such a  
875 cross-talk between cytosol and mitochondria likely includes glutathione metabolism-linked pathways, in  
876 which we and others found parkin cysteines to be involved in as well [21, 38, 86-89].

877 A role for *PRKN* expression in the neutralization and sequestration of dopamine metabolites may  
878 explain why dopamine synthesizing neurons are at great risk in humans with parkin deficiency. Previously,  
879 parkin has been shown to be uniquely sensitive to dopamine stress leading to aggregate formation [34, 55]  
880 (**Supplementary Fig. 6a,b**). In both cells and mice, *prkn* gene expression has been indirectly implicated in  
881 the metabolism of this neurotransmitter, in particular under *ex vivo* conditions of higher dopamine level-  
882 induced stress [21, 34, 68, 86, 90, 91] (see also **Supplementary Fig. 6c,d**).

883 Our results, and those by others, suggest that dopamine-mediated stress in neural cells is ameliorated  
884 when parkin undergoes modifications by dopamine metabolites. However, in contrast to current  
885 interpretations, which stipulate oxidation by quinones is equal to a loss of parkin activity, we posit that such  
886 oxidation is part of parkin's physiological role within post-mitotic cells of the adult brain based on two  
887 principal findings. First, we demonstrate that wild-type parkin directly interacts with highly electrophilic  
888 dopamine metabolites at specific residues, foremost Cys95 (**Fig. 6**). This primate-specific cysteine is  
889 located within the linker region next to charged residues that impact its electrostatic properties and likely its  
890 redox reactivity [70, 92]. In support, we found that in addition to dopamine adduct conjugation, Cys95 is  
891 vulnerable to ROS attacks (**Figs. 3,4,6**), and in parallel studies, to be S-glutathionylated when exposed to  
892 rising concentrations of oxidized glutathione [38]. Strikingly, we found that Cys95 is not only required for  
893 parkin-dependent enhanced melanin formation, but also for participation in effective H<sub>2</sub>O<sub>2</sub> reduction in  
894 M17 cells during dopamine toxicity (**Fig. 6e-g; Fig. 7e**).

895 Second, our finding that parkin augments melanin formation *in vitro*, together with our finding that the  
896 protein is closely associated with neuromelanin granules within LAMP-3<sup>+</sup>- lysosomes of human brain  
897 (**Fig.8; Supplementary Fig. 9**), suggest a role for parkin in *dopamine metabolism-linked neuroprotection*  
898 (**Supplementary Fig. 10**). We noted with interest that several autopsy reports have described lesser  
899 neuromelanin content in surviving neurons of the *S. nigra* in *PRKN*-linked ARPD [93-98] (**Fig. 8f**).  
900 Intriguingly, variants at the *LAMP3/CD63* locus, as well as of other dopamine metabolism-related genes,  
901 *e.g.*, *GCH-1*, have been recently identified as modifiers of susceptibility to late-onset, typical PD [99-101].  
902 However, proof of any causality for parkin playing an essential role in neuromelanin formation awaits a  
903 suitable animal model.

904 To date, parkin is best known for its function as an E3 ligase, and the ubiquitin ligation-dependent  
905 involvement in mitophagy. Because ubiquitin-ligating activity occurs via cysteine-mediated trans-  
906 thiolation, controlling the redox state and functioning as an E3 ligase may not be mutually exclusive. For  
907 example, low concentrations of pro-oxidants, as well as sulfhydrylation, can activate parkin's E3 activity *in*  
908 *vitro* [31, 32, 76]. A similar duality in functions, *i.e.*, regulating ubiquitylation and redox state in cells, has

*Parkin Insolubility in Human Midbrain is Linked to Redox Balance*

909 been previously described for the sensitive-to-apoptosis gene (SAG) product, also known as RBX2 / ROC2  
910 / RNF7 [102, 103]. It contains a RING finger, and similar to parkin, was found to form HMW oligomers  
911 through oxidation of its cysteines [102, 103]. SAG protects cells from oxidative stress in a thiol-mediated  
912 manner in addition to functioning as an E3 ligase.

913 From this analogy, we postulate that parkin's *cytoprotective E3 function* and role in mitophagy is  
914 possibly linked to its soluble form within the cytosol, which could be most important during early  
915 developmental stages, such as during cardiac development [13], in dividing striated muscle cells[104], and  
916 in relatively younger, neural cells including glia [88]. In support, Yi et al. recently described a strong  
917 correlation between parkin point mutants, their impact on structure and protein stability *vs.* ubiquitin ligase  
918 activity and the degree of mitophagy efficiency [77]. In addition, other parkin functions, such as those  
919 related to MITAP [9], inflammation signalling [10, 11] and redox-based neutralization of radicals could be  
920 more essential to the sustained health of older, postmitotic cells, *e.g.*, *S. nigra* neurons.

921 The strength of our study is the focus on parkin metabolism in human midbrain and other tissues,  
922 which has never been undertaken before at these biochemical and structural levels since the gene's  
923 discovery in 1998. In summary, we have shown that parkin fulfils criteria of a typical redox molecule: the  
924 sensing of oxidative (and reducing) stress via its thiols; and the direct, reciprocal redox regulation of its  
925 environment, thus conferring protective outcomes. If confirmed by future work, this redox chemistry-based  
926 expansion of parkin's functions in the ageing human midbrain (**Supplementary Fig. 10**) may open the  
927 door to test its role in other neurodegenerative conditions, such as late-onset, non-*PRKN*-linked PD [105].  
928 Most important, our findings emphasize the need for early identification of persons afflicted by *PRKN* gene  
929 mutations for the prioritization of appropriate interventions in the future, such as via gene therapy [106] and  
930 polyvalent, anti-oxidant therapy [107].

931 **Acknowledgments**

932 We are very grateful for the commitment of patients and their families to participate in autopsy studies. We  
933 thank Dr. J. Palacino for creating stable M17 cell lines, Drs. A. Brice and E. Fon for sharing *prkn*-null  
934 mice, Dr. B. Madras for providing specimens of cynomolgus brain, Drs. R. Tam, L. Dong, Ms. K. Solti and  
935 Ms. H. Boston for technical support, Dr. D. Gibbins for antibodies, Dr. D. Gray for assistance with  
936 confocal imaging, Drs. M. Medina and R. R. Ratan for encouragement, Drs. S. Bennett, D. Pratt for  
937 discussions, and Drs. H. Lochmueller, M. Rousseaux and past members of the Schlossmacher lab for their  
938 suggestions. **Funding:** This work was supported by the: Parkinson Research Consortium of Ottawa  
939 (J.M.T., D.N.E.K., J.J.T.); Queen Elizabeth II Graduate Scholarship Fund (J.M.T.); Government of Canada  
940 [NSERC (J.K.); CIHR MD/PhD Program (J.M.T., A.C.N.); CIHR Research Grant (G.S.S., A.P.); CIHR  
941 Canada Research Chair Program (M.G.S., A.P.)]; Michael J. Fox Foundation for Parkinson's Research  
942 (P.T., J.J.T., L.Z., M.G.S.); The Research Foundation of the MS Society of Canada; Progressive MS  
943 Alliance (A.P.); Hungarian Brain Research Program (G.T.); Utra and Sam Bhargava Family (E.T.,  
944 M.G.S.); and The Ottawa Hospital (E.T., M.G.S.).

945

946 **Author contributions:** *Study design:* J.M.T., D.N.E.K., P.T., J.J.T., M.G.S.; *Writing and Figure*  
947 *preparation:* J.M.T., D.N.E.K., N.A.L., T.K.F., M.J., A.P.N., J.L., G.S.S., J.M.W., G.T., P.T., J.J.T., and  
948 M.G.S. prepared the initial draft of the manuscript and figures. All authors reviewed and / or edited the  
949 manuscript and approved of the submitted versions. *Experiments:* J.M.T., D.N.E.K., N.A.L., T.K.F., M.J.,  
950 A.P.N., B.O., L.W., J.K., A.C.N., Q.J., R.S., J.L., M.Z., K.R.B., A.T., X.D., L.P., G.T. performed  
951 experiments; and C.R.S., A.B.W., E.T., A.H., A.P., J.A.C., provided data, tissue specimens and critical  
952 comments. *Analysis:* J.M.T., D.N.E.K., J.L., T.K.F., G.S.S., L.P., G.T., J.M.W., P.T., J.J.T., M.G.S.  
953 performed data analyses. *Study supervision:* P.T., J.J.T., M.G.S. *Overall responsibility:* M.G.S.

954

955 **Dedication:** This work is dedicated to the memories of Mr. Bruce Hayter (1962-2019), a tireless advocate  
956 for persons with young-onset parkinsonism, and our co-author, Dr. Arne Holmgren (1940-2020), a pioneer  
957 in redox biology; both men died during the preparation of earlier versions of this manuscript. We are  
958 grateful to Dr. Oleh Hornykiewicz (1927-2020), the founding father of the dopamine era in neuroscience,  
959 for his tireless advocacy for biochemical investigations of the human brain and his mentorship.

960

961 **Competing interests:** Drs. B. O'Neill, M. Jin, L. Wang, P. Taylor are (or were) employees of  
962 BioLegend Inc. (Dedham, MA., USA). The Ottawa Hospital receives payments from BioLegend Inc.  
963 related to licensing agreements for immunological reagents related to parkin and  $\alpha$ -synuclein. Dr. M.  
964 Schlossmacher received travel reimbursements from the Michael J. Fox Foundation for Parkinson's  
965 Research for participation in industry summits and consulting fees as well as royalties from Genzyme-  
966 Sanofi for patents unrelated to this work. Dr. G. Toth is an employee and a shareholder of Cantabio

*Parkin Insolubility in Human Midbrain is Linked to Redox Balance*

967 Pharmaceuticals. Dr. A. Holmgren (deceased) served as chairman and senior scientist at IMCO Corporation  
968 Ltd AB, Stockholm, Sweden. No additional, potentially competing financial interests are declared.

969

970

971 **Additional information**

972

973 **Data and materials availability:** Original data associated with this study are available in the main text and  
974 supplementary figures and tables; additional data will be made available upon request.

975

976 **Supplementary Information** is available for this manuscript in the form of a videoclip.

977

978 **Correspondence and requests for materials** should be addressed to J.J.T or M.G.S.

979

980

981

982

983

984

985

986

987

988

989

990

991

992

993

994

995

996

997

998

999

1000

1001

1002

1003

1004 **References**

- 1005 1. T. Kitada, S. Asakawa, N. Hattori, H. Matsumine, Y. Yamamura, S. Minoshima, et al.,  
1006 Mutations in the parkin gene cause autosomal recessive juvenile parkinsonism, *Nature* 392(6676)  
1007 (1998) 605-8.
- 1008 2. M. Kasten, C. Hartmann, J. Hampf, S. Schaake, A. Westenberger, E.J. Vollstedt, et al.,  
1009 Genotype-Phenotype Relations for the Parkinson's Disease Genes Parkin, PINK1, DJ1:  
1010 MDSGene Systematic Review, *Mov Disord* 33(5) (2018) 730-741.
- 1011 3. K.M. Doherty, L. Silveira-Moriyama, L. Parkkinen, D.G. Healy, M. Farrell, N.E. Mencacci,  
1012 et al., Parkin disease: a clinicopathologic entity?, *JAMA Neurol* 70(5) (2013) 571-9.
- 1013 4. A.K. Berger, G.P. Cortese, K.D. Amodeo, A. Weihofen, A. Letai, M.J. LaVoie, Parkin  
1014 selectively alters the intrinsic threshold for mitochondrial cytochrome c release, *Hum Mol Genet*  
1015 18(22) (2009) 4317-28.
- 1016 5. N. Matsuda, S. Sato, K. Shiba, K. Okatsu, K. Saisho, C.A. Gautier, et al., PINK1 stabilized by  
1017 mitochondrial depolarization recruits Parkin to damaged mitochondria and activates latent Parkin  
1018 for mitophagy, *J Cell Biol* 189(2) (2010) 211-21.
- 1019 6. D.P. Narendra, S.M. Jin, A. Tanaka, D.F. Suen, C.A. Gautier, J. Shen, et al., PINK1 is  
1020 selectively stabilized on impaired mitochondria to activate Parkin, *PLoS Biol* 8(1) (2010)  
1021 e1000298.
- 1022 7. G.L. McLelland, V. Soubannier, C.X. Chen, H.M. McBride, E.A. Fon, Parkin and PINK1  
1023 function in a vesicular trafficking pathway regulating mitochondrial quality control, *EMBO J*  
1024 33(4) (2014) 282-95.
- 1025 8. A.K. Muller-Rischart, A. Pilsl, P. Beaudette, M. Patra, K. Hadian, M. Funke, et al., The E3  
1026 ligase parkin maintains mitochondrial integrity by increasing linear ubiquitination of NEMO, *Mol*  
1027 *Cell* 49(5) (2013) 908-21.
- 1028 9. D. Matheoud, A. Sugiura, A. Bellemare-Pelletier, A. Laplante, C. Rondeau, M. Chemali, et  
1029 al., Parkinson's Disease-Related Proteins PINK1 and Parkin Repress Mitochondrial Antigen  
1030 Presentation, *Cell* 166(2) (2016) 314-327.
- 1031 10. F. Mouton-Liger, T. Rosazza, J. Sepulveda-Diaz, A. Ieang, S.M. Hassoun, E. Claire, et al.,  
1032 Parkin deficiency modulates NLRP3 inflammasome activation by attenuating an A20-dependent  
1033 negative feedback loop, *Glia* 66(8) (2018) 1736-1751.
- 1034 11. D.A. Sliter, J. Martinez, L. Hao, X. Chen, N. Sun, T.D. Fischer, et al., Parkin and PINK1  
1035 mitigate STING-induced inflammation, *Nature* (2018).
- 1036 12. S.K. Barodia, R.B. Creed, M.S. Goldberg, Parkin and PINK1 functions in oxidative stress  
1037 and neurodegeneration, *Brain Res Bull* 133 (2017) 51-59.

*Parkin Insolubility in Human Midbrain is Linked to Redox Balance*

- 1038 13. G. Gong, M. Song, G. Csordas, D.P. Kelly, S.J. Matkovich, G.W. Dorn, 2nd, Parkin-  
1039 mediated mitophagy directs perinatal cardiac metabolic maturation in mice, *Science* 350(6265)  
1040 (2015) aad2459.
- 1041 14. A.M. Pickrell, C.H. Huang, S.R. Kennedy, A. Ordureau, D.P. Sideris, J.G. Hoekstra, et al.,  
1042 Endogenous Parkin Preserves Dopaminergic Substantia Nigral Neurons following Mitochondrial  
1043 DNA Mutagenic Stress, *Neuron* 87(2) (2015) 371-81.
- 1044 15. J.H. Shin, H.S. Ko, H. Kang, Y. Lee, Y.I. Lee, O. Pletinkova, et al., PARIS (ZNF746)  
1045 repression of PGC-1alpha contributes to neurodegeneration in Parkinson's disease, *Cell* 144(5)  
1046 (2011) 689-702.
- 1047 16. F.A. Zucca, E. Basso, F.A. Cupaioli, E. Ferrari, D. Sulzer, L. Casella, et al., Neuromelanin  
1048 of the human substantia nigra: an update, *Neurotox Res* 25(1) (2014) 13-23.
- 1049 17. A.J. Whitworth, D.A. Theodore, J.C. Greene, H. Beneš, P.D. Wes, L.J. Pallanck, Increased  
1050 glutathione S-transferase activity rescues dopaminergic neuron loss in a *Drosophila* model of  
1051 Parkinson's disease, *Proceedings of the National Academy of Sciences* 102(22) (2005) 8024-  
1052 8029.
- 1053 18. P. Ge, V.L. Dawson, T.M. Dawson, PINK1 and Parkin mitochondrial quality control: a  
1054 source of regional vulnerability in Parkinson's disease, *Mol Neurodegener* 15(1) (2020) 20.
- 1055 19. J.J. Palacino, D. Sagi, M.S. Goldberg, S. Krauss, C. Motz, M. Wacker, et al., Mitochondrial  
1056 dysfunction and oxidative damage in parkin-deficient mice, *J Biol Chem* 279(18) (2004) 18614-  
1057 22.
- 1058 20. M. Periquet, O. Corti, S. Jacquier, A. Brice, Proteomic analysis of parkin knockout mice:  
1059 alterations in energy metabolism, protein handling and synaptic function, *J Neurochem* 95(5)  
1060 (2005) 1259-76.
- 1061 21. J.M. Itier, P. Ibanez, M.A. Mena, N. Abbas, C. Cohen-Salmon, G.A. Bohme, et al., Parkin  
1062 gene inactivation alters behaviour and dopamine neurotransmission in the mouse, *Hum Mol*  
1063 *Genet* 12(18) (2003) 2277-91.
- 1064 22. S.J. Lee, D.G. Kim, K.Y. Lee, J.S. Koo, B.J. Lee, Regulatory mechanisms of thiol-based  
1065 redox sensors: lessons learned from structural studies on prokaryotic redox sensors, *Arch Pharm*  
1066 *Res* 41(6) (2018) 583-593.
- 1067 23. L.J. Alcock, M.V. Perkins, J.M. Chalker, Chemical methods for mapping cysteine oxidation,  
1068 *Chem Soc Rev* 47(1) (2018) 231-268.
- 1069 24. J. Segura-Aguilar, I. Paris, P. Munoz, E. Ferrari, L. Zecca, F.A. Zucca, Protective and toxic  
1070 roles of dopamine in Parkinson's disease, *J Neurochem* 129(6) (2014) 898-915.

*Parkin Insolubility in Human Midbrain is Linked to Redox Balance*

- 1071 25. V.A. Hristova, S.A. Beasley, R.J. Rylett, G.S. Shaw, Identification of a novel Zn<sup>2+</sup>-binding  
1072 domain in the autosomal recessive juvenile Parkinson-related E3 ligase parkin, *J Biol Chem*  
1073 284(22) (2009) 14978-86.
- 1074 26. M.J. LaVoie, G.P. Cortese, B.L. Ostaszewski, M.G. Schlossmacher, The effects of oxidative  
1075 stress on parkin and other E3 ligases, *J Neurochem* 103(6) (2007) 2354-68.
- 1076 27. F. Meng, D. Yao, Y. Shi, J. Kabakoff, W. Wu, J. Reicher, et al., Oxidation of the cysteine-  
1077 rich regions of parkin perturbs its E3 ligase activity and contributes to protein aggregation, *Mol*  
1078 *Neurodegener* 6 (2011) 34.
- 1079 28. K.F. Winklhofer, I.H. Henn, P.C. Kay-Jackson, U. Heller, J. Tatzelt, Inactivation of parkin  
1080 by oxidative stress and C-terminal truncations: a protective role of molecular chaperones, *J Biol*  
1081 *Chem* 278(47) (2003) 47199-208.
- 1082 29. K.K. Chung, B. Thomas, X. Li, O. Pletnikova, J.C. Troncoso, L. Marsh, et al., S-  
1083 nitrosylation of parkin regulates ubiquitination and compromises parkin's protective function,  
1084 *Science* 304(5675) (2004) 1328-31.
- 1085 30. K.K. Chung, V.L. Dawson, T.M. Dawson, S-nitrosylation in Parkinson's disease and related  
1086 neurodegenerative disorders, *Methods Enzymol* 396 (2005) 139-50.
- 1087 31. D. Yao, Z. Gu, T. Nakamura, Z.Q. Shi, Y. Ma, B. Gaston, et al., Nitrosative stress linked to  
1088 sporadic Parkinson's disease: S-nitrosylation of parkin regulates its E3 ubiquitin ligase activity,  
1089 *Proc Natl Acad Sci U S A* 101(29) (2004) 10810-4.
- 1090 32. M.S. Vandiver, B.D. Paul, R. Xu, S. Karuppagounder, F. Rao, A.M. Snowman, et al.,  
1091 Sulfhydration mediates neuroprotective actions of parkin, *Nat Commun* 4 (2013) 1626.
- 1092 33. J. Chakraborty, V. Basso, E. Ziviani, Post translational modification of Parkin, *Biol Direct*  
1093 12(1) (2017) 6.
- 1094 34. M.J. LaVoie, B.L. Ostaszewski, A. Weihofen, M.G. Schlossmacher, D.J. Selkoe, Dopamine  
1095 covalently modifies and functionally inactivates parkin, *Nat Med* 11(11) (2005) 1214-21.
- 1096 35. C.H. Polman, S.C. Reingold, B. Banwell, M. Clanet, J.A. Cohen, M. Filippi, et al.,  
1097 Diagnostic criteria for multiple sclerosis: 2010 revisions to the McDonald criteria, *Ann Neurol*  
1098 69(2) (2011) 292-302.
- 1099 36. T. Dhaeze, L. Tremblay, C. Lachance, E. Peelen, S. Zandee, C. Grasmuck, et al., CD70  
1100 defines a subset of proinflammatory and CNS-pathogenic TH1/TH17 lymphocytes and is  
1101 overexpressed in multiple sclerosis, *Cell Mol Immunol* 16(7) (2019) 652-665.
- 1102 37. T. Kuhlmann, S. Ludwin, A. Prat, J. Antel, W. Bruck, H. Lassmann, An updated histological  
1103 classification system for multiple sclerosis lesions, *Acta Neuropathol* 133(1) (2017) 13-24.

*Parkin Insolubility in Human Midbrain is Linked to Redox Balance*

- 1104 38. D.N. El Koadi, J.M. Tokarew, R. Sengupta, N.A. Lengacher, A.C. Ng, H. Boston, et al.,  
1105 Parkinson Disease-Linked Parkin Mediates Redox Reactions That Lower Oxidative Stress In  
1106 Mammalian Brain, *bioRxiv* (2020) 2020.04.26.062380.
- 1107 39. X. Dong, Z. Liao, D. Gritsch, Y. Hadzhiev, Y. Bai, J.J. Locascio, et al., Enhancers active in  
1108 dopamine neurons are a primary link between genetic variation and neuropsychiatric disease, *Nat*  
1109 *Neurosci* 21(10) (2018) 1482-1492.
- 1110 40. D.E. Spratt, R.J. Martinez-Torres, Y.J. Noh, P. Mercier, N. Manczyk, K.R. Barber, et al., A  
1111 molecular explanation for the recessive nature of parkin-linked Parkinson's disease, *Nat Commun*  
1112 4 (2013) 1983.
- 1113 41. A. Kumar, J.D. Aguirre, T.E. Condos, R.J. Martinez-Torres, V.K. Chaugule, R. Toth, et al.,  
1114 Disruption of the autoinhibited state primes the E3 ligase parkin for activation and catalysis,  
1115 *EMBO J* 34(20) (2015) 2506-21.
- 1116 42. J.D. Aguirre, K.M. Dunkerley, P. Mercier, G.S. Shaw, Structure of phosphorylated UBL  
1117 domain and insights into PINK1-orchestrated parkin activation, *Proc Natl Acad Sci U S A* 114(2)  
1118 (2017) 298-303.
- 1119 43. R. Kiss, M. Zhu, B. Jojart, A. Czajlik, K. Solti, B. Forizs, et al., Structural features of human  
1120 DJ-1 in distinct Cys106 oxidative states and their relevance to its loss of function in disease,  
1121 *Biochim Biophys Acta Gen Subj* 1861(11 Pt A) (2017) 2619-2629.
- 1122 44. K. Solti, Kuan, W. L., F6rizs, B., Kustos, G., Judith, M., Varga, Z., Herberth, B., Moravcsik,  
1123 E., Kiss, R., K6rp6ti, M., Mikes, A., Zhao, Y., Imre, T., Rochet, J.C., Aigbirhio, F., Williams-  
1124 Gray, C. H., Barker, R. A., T6th, G., DJ-1 can form beta-sheet structured aggregates that co-  
1125 localize with pathological amyloid deposits, *Neurobiology of Disease* (2019).
- 1126 45. C.H. Muller, T.K. Lee, M.A. Montano, Improved chemiluminescence assay for measuring  
1127 antioxidant capacity of seminal plasma, *Methods Mol Biol* 927 (2013) 363-76.
- 1128 46. A. Shevchenko, H. Tomas, J. Havlis, J.V. Olsen, M. Mann, In-gel digestion for mass  
1129 spectrometric characterization of proteins and proteomes, *Nat Protoc* 1(6) (2006) 2856-60.
- 1130 47. J. Cox, M. Mann, MaxQuant enables high peptide identification rates, individualized p.p.b.-  
1131 range mass accuracies and proteome-wide protein quantification, *Nat Biotechnol* 26(12) (2008)  
1132 1367-72.
- 1133 48. S.F. Ali, S.N. David, G.D. Newport, J.L. Cadet, W. Slikker, Jr., MPTP-induced oxidative  
1134 stress and neurotoxicity are age-dependent: evidence from measures of reactive oxygen species  
1135 and striatal dopamine levels, *Synapse* 18(1) (1994) 27-34.



*Parkin Insolubility in Human Midbrain is Linked to Redox Balance*

- 1136 49. M.G. Schlossmacher, M.P. Frosch, W.P. Gai, M. Medina, N. Sharma, L. Forno, et al., Parkin  
1137 localizes to the Lewy bodies of Parkinson disease and dementia with Lewy bodies, *Am J Pathol*  
1138 160(5) (2002) 1655-67.
- 1139 50. M.G. Schlossmacher, H. Shimura, Parkinson's disease: assays for the ubiquitin ligase  
1140 activity of neural Parkin, *Methods Mol Biol* 301 (2005) 351-69.
- 1141 51. B. Shutinoski, M. Hakimi, I.E. Harmsen, M. Lunn, J. Rocha, N. Lengacher, et al., Lrrk2  
1142 alleles modulate inflammation during microbial infection of mice in a sex-dependent manner, *Sci*  
1143 *Transl Med* 11(511) (2019).
- 1144 52. A.C. Pawlyk, B.I. Giasson, D.M. Sampathu, F.A. Perez, K.L. Lim, V.L. Dawson, et al.,  
1145 Novel monoclonal antibodies demonstrate biochemical variation of brain parkin with age, *J Biol*  
1146 *Chem* 278(48) (2003) 48120-8.
- 1147 53. I. Liguori, G. Russo, F. Curcio, G. Bulli, L. Aran, D. Della-Morte, et al., Oxidative stress,  
1148 aging, and diseases, *Clin Interv Aging* 13 (2018) 757-772.
- 1149 54. A. Krezel, W. Maret, The biological inorganic chemistry of zinc ions, *Arch Biochem*  
1150 *Biophys* 611 (2016) 3-19.
- 1151 55. E.S. Wong, J.M. Tan, C. Wang, Z. Zhang, S.P. Tay, N. Zaiden, et al., Relative sensitivity of  
1152 parkin and other cysteine-containing enzymes to stress-induced solubility alterations, *J Biol*  
1153 *Chem* 282(16) (2007) 12310-8.
- 1154 56. E. Ferrari, M. Engelen, E. Monzani, M. Sturini, S. Giroto, L. Bubacco, et al., Synthesis and  
1155 structural characterization of soluble neuromelanin analogs provides important clues to its  
1156 biosynthesis, *J Biol Inorg Chem* 18(1) (2013) 81-93.
- 1157 57. E. Ferrari, A. Capucciati, I. Prada, F.A. Zucca, G. D'Arrigo, D. Pontiroli, et al., Synthesis,  
1158 Structure Characterization, and Evaluation in Microglia Cultures of Neuromelanin Analogues  
1159 Suitable for Modeling Parkinson's Disease, *ACS Chem Neurosci* 8(3) (2017) 501-512.
- 1160 58. H. Shimura, N. Hattori, S. Kubo, M. Yoshikawa, T. Kitada, H. Matsumine, et al.,  
1161 Immunohistochemical and subcellular localization of Parkin protein: absence of protein in  
1162 autosomal recessive juvenile parkinsonism patients, *Ann Neurol* 45(5) (1999) 668-72.
- 1163 59. P.P. Pramstaller, M.G. Schlossmacher, T.S. Jacques, F. Scaravilli, C. Eskelson, I. Pepivani,  
1164 et al., Lewy body Parkinson's disease in a large pedigree with 77 Parkin mutation carriers, *Ann*  
1165 *Neurol* 58(3) (2005) 411-22.
- 1166 60. F.A. Zucca, R. Vanna, F.A. Cupaioli, C. Bellei, A. De Palma, D. Di Silvestre, et al.,  
1167 Neuromelanin organelles are specialized autolysosomes that accumulate undegraded proteins and  
1168 lipids in aging human brain and are likely involved in Parkinson's disease, *NPJ Parkinsons Dis* 4  
1169 (2018) 17.

*Parkin Insolubility in Human Midbrain is Linked to Redox Balance*

- 1170 61. C. Hampe, H. Ardila-Osorio, M. Fournier, A. Brice, O. Corti, Biochemical analysis of  
1171 Parkinson's disease-causing variants of Parkin, an E3 ubiquitin-protein ligase with  
1172 monoubiquitylation capacity, *Hum Mol Genet* 15(13) (2006) 2059-75.
- 1173 62. W.J. Gu, O. Corti, F. Araujo, C. Hampe, S. Jacquier, C.B. Lucking, et al., The C289G and  
1174 C418R missense mutations cause rapid sequestration of human Parkin into insoluble aggregates,  
1175 *Neurobiol Dis* 14(3) (2003) 357-64.
- 1176 63. C. Wang, H.S. Ko, B. Thomas, F. Tsang, K.C. Chew, S.P. Tay, et al., Stress-induced  
1177 alterations in parkin solubility promote parkin aggregation and compromise parkin's protective  
1178 function, *Hum Mol Genet* 14(24) (2005) 3885-97.
- 1179 64. C. Wang, J.M. Tan, M.W. Ho, N. Zaiden, S.H. Wong, C.L. Chew, et al., Alterations in the  
1180 solubility and intracellular localization of parkin by several familial Parkinson's disease-linked  
1181 point mutations, *J Neurochem* 93(2) (2005) 422-31.
- 1182 65. S.R. Sriram, X. Li, H.S. Ko, K.K. Chung, E. Wong, K.L. Lim, et al., Familial-associated  
1183 mutations differentially disrupt the solubility, localization, binding and ubiquitination properties  
1184 of parkin, *Hum Mol Genet* 14(17) (2005) 2571-86.
- 1185 66. M.R. Cookson, P.J. Lockhart, C. McLendon, C. O'Farrell, M. Schlossmacher, M.J. Farrer,  
1186 RING finger 1 mutations in Parkin produce altered localization of the protein, *Hum Mol Genet*  
1187 12(22) (2003) 2957-65.
- 1188 67. D.H. Hyun, M. Lee, N. Hattori, S. Kubo, Y. Mizuno, B. Halliwell, et al., Effect of wild-type  
1189 or mutant Parkin on oxidative damage, nitric oxide, antioxidant defenses, and the proteasome, *J*  
1190 *Biol Chem* 277(32) (2002) 28572-7.
- 1191 68. H. Jiang, Y. Ren, E.Y. Yuen, P. Zhong, M. Ghaedi, Z. Hu, et al., Parkin controls dopamine  
1192 utilization in human midbrain dopaminergic neurons derived from induced pluripotent stem cells,  
1193 *Nat Commun* 3 (2012) 668.
- 1194 69. J. Okarmus, H. Bogetofte, S.I. Schmidt, M. Ryding, S. Garcia-Lopez, B.J. Ryan, et al.,  
1195 Lysosomal perturbations in human dopaminergic neurons derived from induced pluripotent stem  
1196 cells with PARK2 mutation, *Sci Rep* 10(1) (2020) 10278.
- 1197 70. H. Xiao, M.P. Jedrychowski, D.K. Schweppe, E.L. Huttlin, Q. Yu, D.E. Heppner, et al., A  
1198 Quantitative Tissue-Specific Landscape of Protein Redox Regulation during Aging, *Cell* 180(5)  
1199 (2020) 968-983 e24.
- 1200 71. G.M. Jordan, S. Yoshioka, T. Terao, The aggregation of bovine serum albumin in solution  
1201 and in the solid state, *J Pharm Pharmacol* 46(3) (1994) 182-5.

*Parkin Insolubility in Human Midbrain is Linked to Redox Balance*

- 1202 72. G. Paris, S. Kraszewski, C. Ramseyer, M. Enescu, About the structural role of disulfide  
1203 bridges in serum albumins: evidence from protein simulated unfolding, *Biopolymers* 97(11)  
1204 (2012) 889-98.
- 1205 73. W. Maret, Zinc coordination environments in proteins as redox sensors and signal  
1206 transducers, *Antioxid Redox Signal* 8(9-10) (2006) 1419-41.
- 1207 74. K. Ozawa, A.T. Komatsubara, Y. Nishimura, T. Sawada, H. Kawafune, H. Tsumoto, et al.,  
1208 S-nitrosylation regulates mitochondrial quality control via activation of parkin, *Sci Rep* 3 (2013)  
1209 2202.
- 1210 75. T. Wauer, D. Komander, Structure of the human Parkin ligase domain in an autoinhibited  
1211 state, *EMBO J* 32(15) (2013) 2099-112.
- 1212 76. N. Panicker, V.L. Dawson, T.M. Dawson, Activation mechanisms of the E3 ubiquitin ligase  
1213 parkin, *Biochem J* 474(18) (2017) 3075-3086.
- 1214 77. W. Yi, E.J. MacDougall, M.Y. Tang, A.I. Krahn, Z. Gan-Or, J.F. Trempe, et al., The  
1215 landscape of Parkin variants reveals pathogenic mechanisms and therapeutic targets in  
1216 Parkinson's disease, *Hum Mol Genet* 28(17) (2019) 2811-2825.
- 1217 78. F. Koyano, K. Okatsu, H. Kosako, Y. Tamura, E. Go, M. Kimura, et al., Ubiquitin is  
1218 phosphorylated by PINK1 to activate parkin, *Nature* 510(7503) (2014) 162-6.
- 1219 79. C.B. Lucking, A. Durr, V. Bonifati, J. Vaughan, G. De Michele, T. Gasser, et al.,  
1220 Association between early-onset Parkinson's disease and mutations in the parkin gene, *N Engl J*  
1221 *Med* 342(21) (2000) 1560-7.
- 1222 80. N.L. Khan, E. Graham, P. Critchley, A.E. Schrag, N.W. Wood, A.J. Lees, et al., Parkin  
1223 disease: a phenotypic study of a large case series, *Brain* 126(Pt 6) (2003) 1279-92.
- 1224 81. C. Klein, K. Lohmann, Parkinson disease(s): is "Parkin disease" a distinct clinical entity?,  
1225 *Neurology* 72(2) (2009) 106-7.
- 1226 82. S. Lesage, A. Lunati, M. Houot, S.B. Romdhan, F. Clot, C. Tesson, et al., Characterization  
1227 of recessive Parkinson's disease in a large multicenter study, *Ann Neurol* (2020).
- 1228 83. N. Giguere, C. Pacelli, C. Saumure, M.J. Bourque, D. Matheoud, D. Levesque, et al.,  
1229 Comparative analysis of Parkinson's disease-associated genes in mice reveals altered survival and  
1230 bioenergetics of Parkin-deficient dopamine neurons, *J Biol Chem* 293(25) (2018) 9580-9593.
- 1231 84. W. Dauer, S. Przedborski, Parkinson's disease: mechanisms and models, *Neuron* 39(6)  
1232 (2003) 889-909.
- 1233 85. J.M. Flynn, S. Melov, SOD2 in mitochondrial dysfunction and neurodegeneration, *Free*  
1234 *Radic Biol Med* 62 (2013) 4-12.

*Parkin Insolubility in Human Midbrain is Linked to Redox Balance*

- 1235 86. M.S. Goldberg, S.M. Fleming, J.J. Palacino, C. Cepeda, H.A. Lam, A. Bhatnagar, et al.,  
1236 Parkin-deficient mice exhibit nigrostriatal deficits but not loss of dopaminergic neurons, *J Biol*  
1237 *Chem* 278(44) (2003) 43628-35.
- 1238 87. J.A. Rodriguez-Navarro, M.J. Casarejos, J. Menendez, R.M. Solano, I. Rodal, A. Gomez, et  
1239 al., Mortality, oxidative stress and tau accumulation during ageing in parkin null mice, *J*  
1240 *Neurochem* 103(1) (2007) 98-114.
- 1241 88. R.M. Solano, M.J. Casarejos, J. Menendez-Cuervo, J.A. Rodriguez-Navarro, J. Garcia de  
1242 Yebenes, M.A. Mena, Glial dysfunction in parkin null mice: effects of aging, *J Neurosci* 28(3)  
1243 (2008) 598-611.
- 1244 89. M. Damiano, C.A. Gautier, A.L. Bulteau, R. Ferrando-Miguel, C. Gouarne, M.G. Paoli, et  
1245 al., Tissue- and cell-specific mitochondrial defect in Parkin-deficient mice, *PLoS One* 9(6) (2014)  
1246 e99898.
- 1247 90. H. Jiang, Y. Ren, J. Zhao, J. Feng, Parkin protects human dopaminergic neuroblastoma cells  
1248 against dopamine-induced apoptosis, *Hum Mol Genet* 13(16) (2004) 1745-54.
- 1249 91. T. Kitada, A. Pisani, M. Karouani, M. Haburcak, G. Martella, A. Tschertter, et al., Impaired  
1250 dopamine release and synaptic plasticity in the striatum of parkin<sup>-/-</sup> mice, *J Neurochem* 110(2)  
1251 (2009) 613-21.
- 1252 92. C. Gladkova, S.L. Maslen, J.M. Skehel, D. Komander, Mechanism of parkin activation by  
1253 PINK1, *Nature* 559(7714) (2018) 410-414.
- 1254 93. W.R. Gibb, H. Narabayashi, M. Yokochi, R. Iizuka, A.J. Lees, New pathologic observations  
1255 in juvenile onset parkinsonism with dystonia, *Neurology* 41(6) (1991) 820-2.
- 1256 94. H. Takahashi, E. Ohama, S. Suzuki, Y. Horikawa, A. Ishikawa, T. Morita, et al., Familial  
1257 juvenile parkinsonism: clinical and pathologic study in a family, *Neurology* 44(3 Pt 1) (1994)  
1258 437-41.
- 1259 95. Y. Yamamura, S. Kuzuhara, K. Kondo, T. Yanagi, M. Uchida, H. Matsumine, et al.,  
1260 Clinical, pathologic and genetic studies on autosomal recessive early-onset parkinsonism with  
1261 diurnal fluctuation, *Parkinsonism Relat Disord* 4(2) (1998) 65-72.
- 1262 96. S. Hayashi, K. Wakabayashi, A. Ishikawa, H. Nagai, M. Saito, M. Maruyama, et al., An  
1263 autopsy case of autosomal-recessive juvenile parkinsonism with a homozygous exon 4 deletion in  
1264 the parkin gene, *Mov Disord* 15(5) (2000) 884-8.
- 1265 97. M. Yokochi, H. Narabayashi, R. Iizuka, T. Nagatsu, Juvenile parkinsonism--some clinical,  
1266 pharmacological, and neuropathological aspects, *Adv Neurol* 40 (1984) 407-13.

*Parkin Insolubility in Human Midbrain is Linked to Redox Balance*

- 1267 98. N. Gouider-Khouja, A. Larnaout, R. Amouri, S. Sfar, S. Belal, C. Ben Hamida, et al.,  
1268 Autosomal recessive parkinsonism linked to parkin gene in a Tunisian family. Clinical, genetic  
1269 and pathological study, *Parkinsonism Relat Disord* 9(5) (2003) 247-51.
- 1270 99. C. International Parkinson Disease Genomics, M.A. Nalls, V. Plagnol, D.G. Hernandez, M.  
1271 Sharma, U.M. Sheerin, et al., Imputation of sequence variants for identification of genetic risks  
1272 for Parkinson's disease: a meta-analysis of genome-wide association studies, *Lancet* 377(9766)  
1273 (2011) 641-9.
- 1274 100. Y.Q. Wang, B.S. Tang, R.L. Yu, K. Li, Z.H. Liu, Q. Xu, et al., Association analysis of  
1275 STK39, MCCC1/LAMP3 and sporadic PD in the Chinese Han population, *Neurosci Lett* 566  
1276 (2014) 206-9.
- 1277 101. M.A. Nalls, N. Pankratz, C.M. Lill, C.B. Do, D.G. Hernandez, M. Saad, et al., Large-scale  
1278 meta-analysis of genome-wide association data identifies six new risk loci for Parkinson's  
1279 disease, *Nat Genet* 46(9) (2014) 989-93.
- 1280 102. Y. Sun, M. Tan, H. Duan, M. Swaroop, SAG/ROC/Rbx/Hrt, a zinc RING finger gene  
1281 family: molecular cloning, biochemical properties, and biological functions, *Antioxid Redox*  
1282 *Signal* 3(4) (2001) 635-50.
- 1283 103. Y. Sun, H. Li, Functional characterization of SAG/RBX2/ROC2/RNF7, an antioxidant  
1284 protein and an E3 ubiquitin ligase, *Protein Cell* 4(2) (2013) 103-16.
- 1285 104. K.M. Rosen, V. Veereshwarayya, C.E. Moussa, Q. Fu, M.S. Goldberg, M.G.  
1286 Schlossmacher, et al., Parkin protects against mitochondrial toxins and beta-amyloid  
1287 accumulation in skeletal muscle cells, *J Biol Chem* 281(18) (2006) 12809-16.
- 1288 105. T.M. Dawson, V.L. Dawson, Parkin plays a role in sporadic Parkinson's disease,  
1289 *Neurodegener Dis* 13(2-3) (2014) 69-71.
- 1290 106. T. Kitada, J.J. Tomlinson, H.S. Ao, D.A. Grimes, M.G. Schlossmacher, Considerations  
1291 regarding the etiology and future treatment of autosomal recessive versus idiopathic Parkinson  
1292 disease, *Curr Treat Options Neurol* 14(3) (2012) 230-40.
- 1293 107. R.R. Ratan, Antioxidants and the Treatment of Neurological Disease, in: V.E. Koliatsos,  
1294 Ratan, R. R. (Ed.), *Cell Death and Diseases of the Nervous System*, Humana Press, Totowa, NJ,  
1295 1999.
- 1296  
1297  
1298  
1299  
1300  
1301

1302 **Figure Legends**

1303

1304 **Figure 1: Parkin's loss of solubility is specific to adult human brain and correlates with age.**

1305 **(a)** Representative Western blots of parkin, DJ-1, and LC3B distribution in human cortex, *S. nigra* (SN)  
1306 and red nucleus (RN) serially fractionated into Tris-NaCl buffer-soluble (TS), Triton X-100-soluble (TX),  
1307 2% SDS-soluble (SDS) extracts and the pellet (P) lysed in 30% SDS-containing buffer. SDS extracts from  
1308 *PRKN*-linked Parkinson disease (ARPD) brain and recombinant, human parkin (r-parkin) are included.  
1309 Ponceau S is shown as loading control.

1310 **(b)** Relative distribution of parkin signal within each fraction for cortex and midbrain grouped by age  
1311 ranges: young (Y,  $\leq 20$  yrs; n=13); mid (M,  $>20$  yrs but  $<50$  yrs; n=15 for cortex, and n=6 for midbrain);  
1312 older (O,  $\geq 50$  yrs; n=13 for cortex and n=14 for midbrain). Data shown as mean  $\pm$  SEM. The significance  
1313 in protein distribution between soluble (TS+TX) and insoluble (SDS+pellet) fractions was determined  
1314 using 2-way ANOVA (\*\*p<0.001; \*\*\*\*p<0.0001). Additional Western blots are shown in **Extended**  
1315 **Data Fig. 1a-c**. Midbrains include both control and neurological disease cases, as listed in **Extended Data**  
1316 **Table 1**.

1317 **(c)** Western blots of parkin and DJ-1 as well as Ponceau S staining of serial fractions from representative  
1318 human spinal cord and skeletal muscle tissues from individuals  $\geq 50$  yrs.

1319 **(d)** Relative distribution of parkin as in (b) for human spinal cord (n=4) and skeletal muscle specimens  
1320 (n=6) from donors aged 50-71 yrs.

1321 **(e)** Logistic regression analysis of parkin solubility in cortices as a function of age (n=45). Each brain is  
1322 represented by an individual dot; red circles denote three cases of late-onset Parkinson's not linked to  
1323 *PRKN*; the logistic regression line (in red) and 95% confidence intervals (grey) are shown. Age ranges that  
1324 correspond to Y-O-M in (b) are shown under the graph.

1325 **(f-h)** Relative distribution of **(f)** DJ-1, a-synuclein and **(g)** VDAC, MnSOD, glyoxalase (GLO1) and **(h)**  
1326 LC3B in human cortices (n=3-5 per age group), as described in (b). Representative Western blots are  
1327 shown in **Extended Data Fig. 1b,c**.

1328 **(i)** Western blots of parkin and Dj-1 and Ponceau S staining of serial fractions from whole brains of wild-  
1329 type (WT; 8 mths of age) and *prkn* knock-out (KO) mice, WT rat (WT; 14 mths) and from frontal cortex of  
1330 a cynomolgus monkey (60 mths).

1331 **(j)** Western blots of parkin and DJ-1 distribution in two human brainstem nuclei, *L. coeruleus* and *S. nigra*,  
1332 which were collected within 2-5 hrs after death prior to freezing and processed as in (a, c).

1333 **(k)** Logistic regression analysis of parkin solubility in human brain as a function of length for *post mortem*  
1334 interval (PMI; in hrs); the logistic regression analysis line (red) and 95% confidence intervals (grey) are  
1335 shown (n=45 cortices).

1336 **(l)** Immunoblots for endogenous parkin and Dj-1 as well as ponceau S staining from serially extracted WT  
1337 mouse brains (n=3) dissected after a 40 hr *post mortem* interval at 4°C.

1338

*Parkin Insolubility in Human Midbrain is Linked to Redox Balance*

1339 **Figure 2: Parkin's loss of solubility in the brain correlates with a rise in oxidative stress.**

1340 **(a)** Mean concentrations of H<sub>2</sub>O<sub>2</sub> in human brain cortices grouped by age range, as described in Figure 1.  
1341 Individual data points represent separate brains, as reported in **Extended Data Table 1**. Results are plotted  
1342 as mean ± SEM; significance was determined using 2-way ANOVA (\*\*p<0.01; \*\*\*p<0.001).  
1343 **(b-c)** Linear regression analysis of H<sub>2</sub>O<sub>2</sub> concentrations in control cortices (mM/g tissue) as a function of  
1344 age **(b)**, and **(c)** logistic regression analysis of parkin solubility as a function of H<sub>2</sub>O<sub>2</sub> levels in the same  
1345 specimens (n=20). Red circles denote three disease cortices (AD; DLB; PD).  
1346 **(d-e)** Western blots **(d)** of parkin distribution in brain lysates of 2-4 month-old wild-type C57Bl/6J mice  
1347 containing either saline or 1% H<sub>2</sub>O<sub>2</sub>; **(e)** parkin signal distribution was quantified using image-J, as  
1348 controlled for respective loading controls, in both soluble and insoluble fractions. A student t-test was used  
1349 for statistical analysis (\* = < 0.05).  
1350 **(f-g)** Western blots **(f)** of parkin distribution in brains of wild-type C57Bl/6J mice 1 hour following  
1351 intraperitoneal administration of either saline or MPTP neurotoxin (40mg/Kg); **(g)** parkin signals were  
1352 quantified as in (e).  
1353 **(h-i)** Western blots **(h)** of fractionated brain homogenates from C57Bl/6J wild-type and *Sod2*<sup>+/-</sup> mice; **(i)**  
1354 parkin signals were quantified and statistically analyzed as in (e) (\* = < 0.05).

1355

1356 **Figure 3: Parkin's solubility and structure are altered by oxidative modifications.**

1357 **(a)** Western blots of parkin and DJ-1 in SDS fractions from normal cortices (3 age groups are shown) and  
1358 two age-matched patients, *i.e.*, idiopathic Parkinson's (PD) and parkin-deficient ARPD. Sister aliquots of  
1359 the same lysates were processed in parallel by SDS-PAGE either under reducing (+DTT) or non-reducing  
1360 (-DTT) conditions.  
1361 **(b)** Western blots of parkin and SOD2 distribution in serially fractionated human cortices from a young  
1362 individual (age, 5 yrs) and an adult (62 yrs) subject, and separated by SDS-PAGE under reducing (+DTT)  
1363 and non-reducing (-DTT) conditions.  
1364 **(c)** Silver staining of the supernatant of sister aliquots of r-parkin following initial exposure to increasing  
1365 concentrations of H<sub>2</sub>O<sub>2</sub> (0-2mM) followed by the addition (or absence of) DTT (100mM) prior to  
1366 centrifugation as indicated.  
1367 **(d)** Circular dichroism spectra of soluble, untreated, wild-type r-parkin at the start of experiment (T=0; left  
1368 panel), and spectra of soluble (black line) and aggregated (red line) states following incubation at 37°C for  
1369 T=5 days (right panel).  
1370 **(e)** Graphic depiction of strategy for LC-MS/MS-based analysis to identify cysteine oxidation state for  
1371 untreated and H<sub>2</sub>O<sub>2</sub>-treated, parkin species, by using IAA-DTT-NEM fingerprinting to identify reduced  
1372 cysteines with an iodacetamide (IAA) tag or reversibly-oxidized residues with a N-ethylmaleimide (NEM)  
1373 tag.  
1374 **(f-g)** Quantitative analyses of IAA-modified cysteines captured by LC-MS/MS for **(f)** untreated *vs.* H<sub>2</sub>O<sub>2</sub>-  
1375 exposed, wild-type, human r-parkin, and **(g)** soluble compared to insoluble (pellet) fractions. Each dot

*Parkin Insolubility in Human Midbrain is Linked to Redox Balance*

1376 represents the log<sub>2</sub>-transformed total IAA-signal intensities of individual cysteines (n=3 runs for each). The  
1377 cysteine pool is shown with the mean ± SEM; significance \*\*p<0.01, as determined using Student T-Test.  
1378 **(h-i)** LC-MS/MS-generated spectra following trypsin digestion of labelled, oxidized r-parkin indicating  
1379 NEM adducts (+125 mass gain) at Cys95 and Cys253; r-parkin was exposed to H<sub>2</sub>O<sub>2</sub>, and cysteines  
1380 labelled as in (e). See **Extended Data Table 2** for a complete list of modified cysteines and oxidizing  
1381 conditions.

1382

1383 **Figure 4: Parkin cysteine residues are oxidized in human and mouse brain.**

1384 **(a)** Summary of results for 12 immunoprecipitation (IP) runs (TS extracts; n=4; SDS extracts, n=8) from  
1385 human cortices and either saline- or acute (1hr) MPTP toxin-treated murine brain (as described in Fig. 2d,e)  
1386 for endogenous parkin enrichment to identify the redox state of its cysteine residues (see also b-g). All  
1387 specimens were fractionated in the presence of IAA.

1388 **(b-g)** Among the redox active residues identified, Cys95 and Cys253 in human brain parkin were found in  
1389 either a reduced redox state **(b,d)** (*i.e.*, IAA-labelled; +57 mass gain), or **(c,e)** in irreversibly oxidized states,  
1390 *e.g.*, to sulfonic acid (trioxidation; +48 mass). In mouse brain parkin **(f,g)**, Cys252 was found either  
1391 reduced or oxidized as well.

1392

1393 **Figure 5: Wild-type parkin lowers hydrogen peroxide *in vitro*, in cells and the brain.**

1394 **(a-c)** Quantification of H<sub>2</sub>O<sub>2</sub> concentration using AmplexRed, demonstrating **(a)** full-length, human,  
1395 recombinant (r-) parkin when incubated with H<sub>2</sub>O<sub>2</sub> is able to reduce it to water in a r-parkin concentration-  
1396 dependent manner. Effects of r-Parkin were compared to catalase and GSH at equimolar concentrations as  
1397 well as following partial inhibition of catalase by amino-triazole (AT), as indicated. **(b)** Pre-incubation of r-  
1398 parkin with a thiol-conjugating compound (NEM) inhibits parkin-dependent H<sub>2</sub>O<sub>2</sub> reduction in a NEM-  
1399 concentration-dependent manner. **(c)** Reducing capacity of wild-type r-parkin compared to two other, PD-  
1400 linked proteins (DJ-1;  $\alpha$ -synuclein), bovine serum albumin (BSA) and two RING-carrying ubiquitin ligases  
1401 (RNF43; HOIP<sup>cd</sup>, cd = catalytic domain). Their respective cysteine and methionine contents are  
1402 summarized in **(d)**. Two-way ANOVA was used for statistical analysis (\*p < 0.05, \*\*p < 0.01, \*\*\*p <  
1403 0.001, and \*\*\*\*p < 0.0001)

1404 **(e)** Area under the curve (AUC) plots for results from *in vitro* colorimetric assays, where AUC integrates  
1405 total H<sub>2</sub>O<sub>2</sub> levels measured over the time course of the assay (see also **Extended Data Fig. 5e**).

1406 Comparison of WT r-parkin with DJ-1, two r-parkin point mutants, and r-parkin<sub>321-465</sub> (321C). Results  
1407 represent n=3 ± SD; \*p < 0.05, \*\*p < 0.01, \*\*\*p < 0.001, and \*\*\*\*p < 0.0001 using one-way ANOVA with  
1408 Tukey's post hoc test.

1409 **(f)** Quantification of reactive thiol content (in molar equivalents) for r-parkin (WT; two point mutants;  
1410 321C) and full-length r-DJ-1 using the Ellman's reagent assay.

1411 **(g)** Correlation curve between number of free thiols **(f)** vs. the H<sub>2</sub>O<sub>2</sub>-reducing capacity **(e)** for indicated  
1412 proteins.



*Parkin Insolubility in Human Midbrain is Linked to Redox Balance*

1413 **(h-i)** Quantification of H<sub>2</sub>O<sub>2</sub> levels in **(h)** saline vs. MPTP toxin-treated *prkn* wild-type (WT) and *prkn*<sup>-/-</sup>  
1414 mouse brain (n=3/genotype/condition), and **(i)** in human brain from parkin-deficient ARPD cortices  
1415 compared to age- and *post-mortem* interval-matched controls (n=4/group) collected at the same institution.  
1416 Results are represented as the mean concentration of H<sub>2</sub>O<sub>2</sub> (μM) per total protein concentration (μg/μL) or  
1417 tissue weight (g) analyzed ± SEM; \*p<0.05, \*\*\*p < 0.001, and \*\*\*\*p < 0.0001 determined using a Student  
1418 T-test or one-way ANOVA.

1419 **(j-k)** H<sub>2</sub>O<sub>2</sub> quantification **(j)** and cell viability assay **(k)** for dopamine-treated, human M17 cells expressing  
1420 either WT or two ARPD-linked parkin point mutants, as indicated relative to treatment with vehicle alone.  
1421 Cells were exposed to 200 mM dopamine or vehicle for 20h, as indicated. Data points represent the mean  
1422 of duplicates ± SEM (n=3 experiments); \*p<0.05 and \*\*p < 0.01, and \*\*\*\*p < 0.0001 by one-way or two-  
1423 way ANOVA.

1424

1425 **Figure 6: Human parkin conjugates dopamine radicals foremost at residue Cys95.**

1426 **(a-b)** Silver staining **(a)** and Western blot **(b)** of r-parkin in soluble (supernatant) and insoluble (pellet)  
1427 phases following exposure to increasing concentrations of aminochrome (AM; 0-200 μM) and analyzed  
1428 under non-reducing conditions. See lane number for corresponding samples.

1429 **(c)** Mean total number of parkin spectra, as identified by LC-MS/MS following trypsin digestion, of control  
1430 vs. monomeric vs. high molecular weight (HMW), AM-modified r-parkin. Data represent the mean of n=3  
1431 runs ± SEM. \*p<0.05; \*\*\*p<0.001; \*\*\*\*p<0.0001 by 1-way ANOVA.

1432 **(d)** Percentage of peptides carrying a sulfonic acid modification in control vs. monomeric and HMW, AM-  
1433 modified r-parkin. Each point represents one gel specimen submitted to MS. The percentage was calculated  
1434 using only the subset of peptides that were ever detected as carrying a sulfonic acid modification. Statistics  
1435 were done as in (c).

1436 **(e)** Table summarizing LC-MS/MS-based detection of adducts representing dopamine metabolites  
1437 conjugated to cysteines identified in human r-parkin following exposure to aminochrome *in vitro*. Chemical  
1438 structures for identified cysteine-conjugated adducts are shown in **Extended Data Fig. 7b**. Individual  
1439 quantification of each peptide with adduct listed is shown on the right side of the table.

1440 **(f)** Frequency of occurrences for dopamine-metabolite adducts being detected on Cys95 vs. all other  
1441 cysteine residues, as detected by LC-MS/MS and individually shown in (e).

1442 **(g)** LC-MS/MS-generated spectrum following trypsin digestion of AM-exposed r-parkin highlighting a  
1443 dopamine (+151 mass gain) adduct covalently bound to Cys95. See also **Extended Data Fig. 7c-p** for  
1444 additional spectra.

1445 **(h)** Species comparison for wild-type parkin proteins covering sequence alignment of aa90-104, with  
1446 primate-specific residue Cys95 highlighted in red.

1447

1448

1449

1450 **Figure 7. Parkin-dependent increase in melanin formation requires cysteine 95.**

1451 (a) Kinetic curve of melanin production (read at absorbance 405nm) over time in the absence of exogenous  
1452 protein (dopamine (DA Ctrl) alone) vs. increasing molar concentrations of wild-type (WT), full-length  
1453 human r-parkin shown for three concentrations (0.5, 1, 2mM). Each condition was performed in triplicate.

1454 (b) Total melanin formation for indicated recombinant proteins at 60 mins, as expressed relative to its  
1455 production under dopamine only control (Ctrl) condition. Data represent the mean of triplicates  $\pm$  SEM.  
1456 \*\*\* $p < 0.05$  by 1-way ANOVA.

1457 (c) Silver gel for the analysis of His-SUMO-tagged, full-length, human r-parkin proteins of wild-type  
1458 sequence and its variant carrying a p.C95A mutation.

1459 (d-e) Representative kinetic curve for melanin production (d) and relative total melanin formation at 60  
1460 mins (e), where production in the presence of wild-type (WT) or p.C95A mutant r-parkin (each, 2 mM) is  
1461 shown relative to dopamine (DA) (Ctrl) alone. Data represent mean of  $n=2$ , each performed in triplicate  $\pm$   
1462 SEM. \*\*\* $p < 0.05$  by 1-way ANOVA.

1463 (f-g) Protein expression, as shown by Western blotting (f), and fold change in  $H_2O_2$  levels (g) for  
1464 dopamine-treated M17 cells -relative to vehicle treated sister wells- that transiently express either flag-  
1465 vector, or WT vs. p.C95A-mutant human parkin-encoding cDNA plasmids. Results are shown as mean  $\pm$   
1466 SEM ( $n=3$ ) and all dopamine-treated samples (200mM dopamine) were normalized to their respective  
1467 untreated samples. Anti-GAPDH immunoblotting served as loading control (in f). A one-way ANOVA was  
1468 used for statistical analysis (\* $p < 0.05$  and \*\*\* $p < 0.001$ ).

1469

1470 **Figure 8. Parkin localizes to neuromelanin pigment in *S. nigra* neurons of normal human midbrain.**

1471 (a-b) Immunohistochemical detection of parkin in adult human brain including dopamine neurons of the *S.*  
1472 *nigra* using anti-parkin monoclonal antibody clones A15165 E (a) and -G (b). (c) Double labelling for  
1473 tyrosine hydroxylase (TH) and parkin (clone A15165 E) in the *S. nigra* from an adult control subject using  
1474 indirect immunofluorescence microscopy.

1475 (d-f) Immunohistochemical reactivities generated by no primary antibody vs. two anti-parkin (Clones  
1476 A15165 E, D) antibodies on sections of the *S. nigra* from two control subjects, aged (d) 66 yrs and (e) 24  
1477 yrs, as well as (f) from a parkin-deficient ARPD case, aged 71 years. In the indicated panels,  
1478 immunoreactivity was detected by metal-enhanced DAB (eDAB; generating black colour) and  
1479 hematoxyline as a counterstain (blue). No primary antibody added generates a pigment-induced signal for  
1480 neuromelanin (brown). Scale bars represent 100  $\mu$ m, or as indicated.

1481 (g-j) Immunofluorescent signals, as generated by double-labelling of human *S. nigra* sections containing  
1482 dopamine neurons, using anti-parkin (clone-E; green colour) and anti-LAMP-3/CD63 (red colour)  
1483 antibodies; (blue colour, Hoechst stain). Brightfield microscopy image in the same field (neuromelanin  
1484 pigment is visible; left panel) and a no primary antibody (h) run in parallel are shown. (i) Higher  
1485 magnification of a single dopamine neuron and (j) further magnification for visualization of subcellular  
1486 signals within a neighbouring dopamine neuron is shown, as indicate

1487 **Supplementary Figure 1. Parkin becomes progressively insoluble in aged human brain.**

1488 **(a)** Western blots of parkin, DJ-1,  $\alpha$ -synuclein and LC3B distribution in 9 representative human cortices  
1489 (see **Extended Data Table 1**). Tissue fractionation and age ranges were as described in **Fig. 1**; SDS/PAGE  
1490 experiments run under reducing conditions; SDS-extracted fractions of parkin-deficient PD brain (ARPD)  
1491 lysates and r-parkin are included as controls.  
1492 **(b)** Western blots of parkin, DJ-1, VDAC, MnSOD and glyoxalase-1 proteins, and Ponceau S staining in  
1493 serially fractionated human cortices from younger (n=3) and older (n=3) individuals. Quantification of  
1494 relative protein distribution is shown in **Fig. 1g**.  
1495 **(c)** Western blot of indicated proteins from serially fractionated cortex and midbrain from a single donor as  
1496 described in (a).  
1497 **(d)** Quantification of log-transformed *PRKN* mRNA signals from individual pyramidal neurons (PY),  
1498 leukocytes (non-neuronal cells; NN) and *S. nigra* dopamine neurons (SNDA) isolated from healthy controls  
1499 (age range, 38 to 99 yrs).  
1500 **(e)** Linear regression analysis of log-transformed *PRKN* transcripts as a function of age in human control *S.*  
1501 *nigra* dopamine neurons where each dot represents values for a single neuron, as shown in (d).

1502  
1503 **Supplementary Figure 2. Parkin solubility is not altered by length of *post mortem* interval, tissue**  
1504 **freezing, or pH levels of the buffer.**

1505 **(a-b)** Western blots of parkin and DJ-1 distribution as well as Ponceau S staining for fractions of human  
1506 brain tissue from striatum **(a)**, *L. coeruleus* and *S. nigra* **(b)** with short *post mortem* interval (2-6 hrs, as  
1507 indicated).  
1508 **(c-d)** Western blots, as described in (a), from dissected *S. nigra* **(c)** and posterior midbrain structures  
1509 comprising nucleus of cranial nerve-III and the periaqueductal grey **(d; rest)**. Tissues were collected *post*  
1510 *mortem* and parkin distribution visualized in aliquots of the same specimens processed in parallel after  
1511 being kept at 4°C or processed via one-time freezing and thawing prior to serial fractionation.  
1512 **(e-f)** Western blots of parkin and DJ-1 distribution as well as Ponceau S staining in fractions of human  
1513 cortex **(e, single brain; f, two different brains)** serially extracted in parallel using standard buffers with  
1514 varying pH, as indicated.  
1515 **(g)** Western blots of parkin and DJ-1 distribution in a human cortex sample following serial fractionation  
1516 with TS- TX-, SDS- and Pellet buffers compared to processing by standard RIPA buffer, where the pellet  
1517 after RIPA extraction is denoted as RIPA-P.

1518  
1519 **Supplementary Figure 3. Oxidation of parkin thiols promotes insolubility.**

1520 **(a)** Silver stained gel of wild-type, human r-parkin exposed to H<sub>2</sub>O<sub>2</sub> (10 mM), followed by treatment with  
1521 increasing concentrations of DTT (0-100 mM) prior to centrifugation and loading of the supernatant onto  
1522 SDS-PAGE.

*Parkin Insolubility in Human Midbrain is Linked to Redox Balance*

1523 **(b)** Detection of r-parkin in soluble (supernatant) and insoluble phases (pellet; recovered by 10% SDS-  
1524 containing buffer) following exposure to increasing concentrations of DTT (0-1M).  
1525 **(c)** Spectra from LC-MS/MS analyses of recombinant (r-), human, wild-type parkin holoprotein (without  
1526 any trypsin digestion) without pre-labelling (panel on the left) and after tagging of 35 vs. 36 thiol-carrying  
1527 residues by iodoacetamide (IAA; right panel), corresponding to the three main peaks (one in left panel; two  
1528 in right panel), as indicated. The 51,641.97 Da peak closely matches its calculated mass of 51,640.62 Da;  
1529 53,639.40 Da corresponds to the conjugation of 35 IAA adducts; 53,695.18 Da corresponds to 36 IAA  
1530 adducts, indicating that all 35 cysteine residues and either the N-terminal amino group or a single  
1531 methionine residue was IAA-modified.  
1532 **(d)** Dynamic light scattering analysis showing progressive size changes, as measured in hydrodynamic  
1533 diameters (nm), monitored during 0, 1, 3 and 5 hrs at room temperature. The structural state for wild-type,  
1534 human r-parkin under non-reducing, native conditions showed increased aggregate formation over time,  
1535 which was partially reversed by DTT.

1536

1537 **Supplementary Figure 4. Immunoprecipitation of brain parkin and summary of redox-related thiol**  
1538 **chemistry.**

1539 **(a-b)** Representative Western blot **(a)** and Coomassie blue-stained **(b)** visualization of parkin  
1540 immunoprecipitated from human frontal lobe cortex, as described [Shimura and Schlossmacher, Methods  
1541 Enzymol 2005] by monoclonal anti-parkin A15165-B and visualized by polyclonal anti-parkin 2132, in  
1542 preparation for LC-MS/MS (see also **Fig. 4**). Brain tissue was homogenized in the presence of IAA to  
1543 prevent the oxidation of reduced thiols during processing, thereby generating alkylated-parkin monomers at  
1544 the 51-54 kDa position.

1545 **(c)** Schema of select, reversible and irreversible cysteine modifications that can occur on thiols (-SH) due to  
1546 attacks by reactive oxygen species (ROS), reactive nitrogen species (RNS), reactive sulfur species (RSS)  
1547 and reactive electrophilic species (RES), which include dopamine quinones. Graphic summary was  
1548 modified from Alcock *et al.*, 2018.

1549

1550 **Supplementary Figure 5. Parkin directly reduces hydrogen peroxide in a concentration- and thiol**  
1551 **integrity-dependent but non-enzymatic manner.**

1552 **(a)** Peroxidase enzymatic activity for r-parkin and glutathione (GSH; +, 0.5 $\mu$ M; ++, 1 $\mu$ M), as tested *in vitro*  
1553 in comparison to horseradish peroxidase (HRP, 1mU/mL). Mean peroxidase activity  $\pm$  SEM.  
1554 \*\*\*\*p<0.0001 by 1-way ANOVA.

1555 **(b-c)** Quantification of H<sub>2</sub>O<sub>2</sub> concentrations by AmplexRed following incubation of increasing levels of r-  
1556 parkin **(b)** pre-oxidized with increasing concentrations of H<sub>2</sub>O<sub>2</sub>, or **(c)** treated with increasing  
1557 concentrations of EDTA. A two-way ANOVA was used for statistical analysis (\*\*\*\*p<0.0001).

1558 **(d)** Commassie Blue-stained visualization of r-parkin, RNF43 and HOIP<sup>cd</sup> proteins, used in the AmplexRed  
1559 assay shown in **Fig. 5c**.

*Parkin Insolubility in Human Midbrain is Linked to Redox Balance*

1560 (e) Kinetic readings from *in vitro* colorimetric H<sub>2</sub>O<sub>2</sub> assays (left panel) comparing increasing  
1561 concentrations of input H<sub>2</sub>O<sub>2</sub> (green lines) and the effect of increasing concentrations of glutathione  
1562 (purple, pink lines). Curves were converted to the area under the curve (AUC) where AUC integrates the  
1563 total value of H<sub>2</sub>O<sub>2</sub> signals generated over the 10 mins time course of the assay (right panel).  
1564 (f-l) AUC graphs for results from *in vitro* H<sub>2</sub>O<sub>2</sub> assays for various concentrations of recombinant proteins,  
1565 as indicated. Statistical analysis was performed as in Fig. 5e.  
1566 (m) Visualization of recombinant PD proteins post H<sub>2</sub>O<sub>2</sub> exposure by silver staining where SDS/PAGE gel  
1567 was run under non-reducing conditions.

1568

1569 **Supplementary Figure 6. Parkin protects neural cells from dopamine toxicity in a protein**  
1570 **concentration-dependent manner.**

1571 (a-b) Western blots of parkin in the soluble supernatant (a) and insoluble, serial pellet (b) fractions of  
1572 lysates from dopamine-treated human M17 neuroblastoma cells, which stably express vector-control  
1573 plasmid (parkin -) or human *PRKN* cDNA at mid- (+) or high (++) levels. Cells were exposed to 20 mM  
1574 (+) and 200 mM (++) dopamine for 20 hrs, as indicated. SDS/PAGE gels were run under reducing  
1575 conditions.

1576 (c) Cell viability assay of cells highlighted in (a, b). Representative data are shown for the mean of  
1577 duplicates ± SEM from n=4-8 independent experiments; \*p<0.05 by 1-way ANOVA.

1578 (d) Correlation studies of experiments, as conducted in (a, b), to monitor parkin expression levels vs. cell  
1579 survival.

1580

1581 **Supplementary Figure 7. Human parkin conjugates dopamine metabolites at cysteine 95 and other**  
1582 **cysteine residues.**

1583 (a) Chemical structures of 4 dopamine metabolites (red) conjugated to a thiol group (black) that were  
1584 screened for in LC-MS/MS experiments, with their corresponding mass shift added.

1585 (b-o) LC-MS/MS-generated spectra following trypsin digestion of aminochrome-treated, human r-parkin  
1586 protein highlighting representative adduct conjugation events, which were identified by mass shift gains as  
1587 shown in (a), at the following residues: Cys95 (b-g), Cys166, Cys169 and Cys 182 (h-j), to Cys212 (k),  
1588 Cys238 (l), Cys293 (m), Cys360 (n), and Cys365 (o). See also Fig. 6e,g.

1589

1590

1591 **Supplementary Figure 8. Characterization of four, new monoclonal antibodies raised in mice against**  
1592 **human parkin.**

1593 (a-b) Characterization of four murine, monoclonal antibodies (of IgG<sub>2</sub> isotype; clone-B, -E, -D, and -G) by

1594 (a) non-denaturing dot blots against human brain lysates (SDS fractions from control and *PRKN*-linked

1595 ARPD cases); and (b) by denaturing SDS/PAGE under reducing conditions and Western blotting of

1596 extracts from cortical specimens of a control brain and a parkin-deficient ARPD case. Screening by these

*Parkin Insolubility in Human Midbrain is Linked to Redox Balance*

1597 three methods as well as by cell-based microscopy using indirect immunofluorescence (not shown)  
1598 revealed specific staining for four anti-parkin clones (-B, -E, -D and -G), which was conformation-  
1599 dependent for clone-E.  
1600 (c) List of epitopes within the sequence of human parkin, as recognized by clones -B, -E, -D, and -G and  
1601 identified by screening with overlapping 7-12 amino acid-long peptides covering full-length, human parkin.  
1602 Note, the clone E epitope is conformational, comprised of the three regions as indicated.

1603

1604 **Supplementary Figure 9. Parkin is specifically detected in human brain sections by routine**  
1605 **microscopy.**

1606 (a-c) H&E (a), anti-tyrosine hydroxylase (TH) (b) and anti-parkin (clone A15165-G) (c) staining of  
1607 dopamine neurons in the *S. nigra* of midbrain sections from a parkin-deficient ARPD case.  
1608 (d-g) Immunohistochemical detection of parkin in the *S. nigra* of an individual with dementia with Lewy  
1609 bodies. Both intra- and extracellular anti-parkin-reactive neuromelanin granules are visible. (b) No primary  
1610 antibody control and staining with anti-parkin monoclonal antibodies (e) A15165-E, (f) -D and (g) -G are  
1611 shown.  
1612 (h) Immunohistochemical detection of LAMP-3 protein in dopamine neurons of the *S. nigra* from an adult  
1613 control brain. Scale bars represent 100  $\mu$ m.

1614

1615 **Supplementary Figure 10. Graphic summary of a working model for parkin's redox functions in**  
1616 **adult, human dopamine neurons.**

1617 In human brain, parkin thiol (-SH) oxidation neutralizes cellular reactive oxygen species (ROS; H<sub>2</sub>O<sub>2</sub>) and  
1618 potentially toxic dopamine (DA) radicals (e.g., DA quinones; RES) during normal ageing. The oxidation of  
1619 wild-type parkin promotes insolubility and aggregation. In human brain, both reversible and irreversible  
1620 oxidation events occur, which promote parkin's transition into a mostly insoluble, aggregate-associated  
1621 state by the beginning of the 5<sup>th</sup> decade. In adult dopamine neurons of the *S. nigra*, its oxidation and  
1622 aggregation lead to the accumulation of a pool of parkin within LAMP-3-positive lysosomes. This  
1623 multimodal oxidation of parkin confers neuroprotection. In *PRKN*-linked ARPD, the absence of parkin's  
1624 redox effects contributes to a rise in ROS (and RNS) levels, reduced sequestration of dopamine radicals  
1625 (RES), and possibly, less neuromelanin formation.

1626

1627 **Supplementary Table 1. List of human tissue specimens examined in this study.**

1628 Characteristics listed include brain regions of frontal cortex (F ctx), midbrain, thoracic spinal cord  
1629 (harvested with skeletal muscle); age (in years); sex (F, female; M, male); PMI, *post mortem* interval  
1630 recorded in hours (hrs); n.d., not determined with accuracy (i.e., inconsistent PMI information); brain  
1631 diagnosis, where \* indicates that the tissue examined was not affected by a detectable disease process;  
1632 parkin solubility lists 1 for it being present in Tris-saline (TS) buffer or 0 (absent in TS-buffer); and the  
1633 figure(s) that specimens were analyzed in this study; E, extended data.

*Parkin Insolubility in Human Midbrain is Linked to Redox Balance*

1634

1635 **Supplementary Table 2: Parkin's cysteine residues are redox active.**

1636 Aliquots of human recombinant (r-) parkin that were oxidized by variable concentrations of H<sub>2</sub>O<sub>2</sub> vs.

1637 control preparations were differentially labelled with iodoacetamide (IAA) and/or N-ethylmaleimide

1638 (NEM; as in Figure 4A) to identify reduced cysteines (IAA) or reversibly-oxidized residues (NEM).

1639 Proteins were subjected to LC-MS/MS and analyzed using Mascot Scaffold PTM to identify IAA (•) or

1640 NEM (+) adducts indicating when these were detectable on individual residues. Cysteines that were not

1641 detected as modified in individual runs are also listed (n/d). Note that cysteines within all four RING

1642 domains of parkin as well as in the linker and UBL domains can be variably modified.

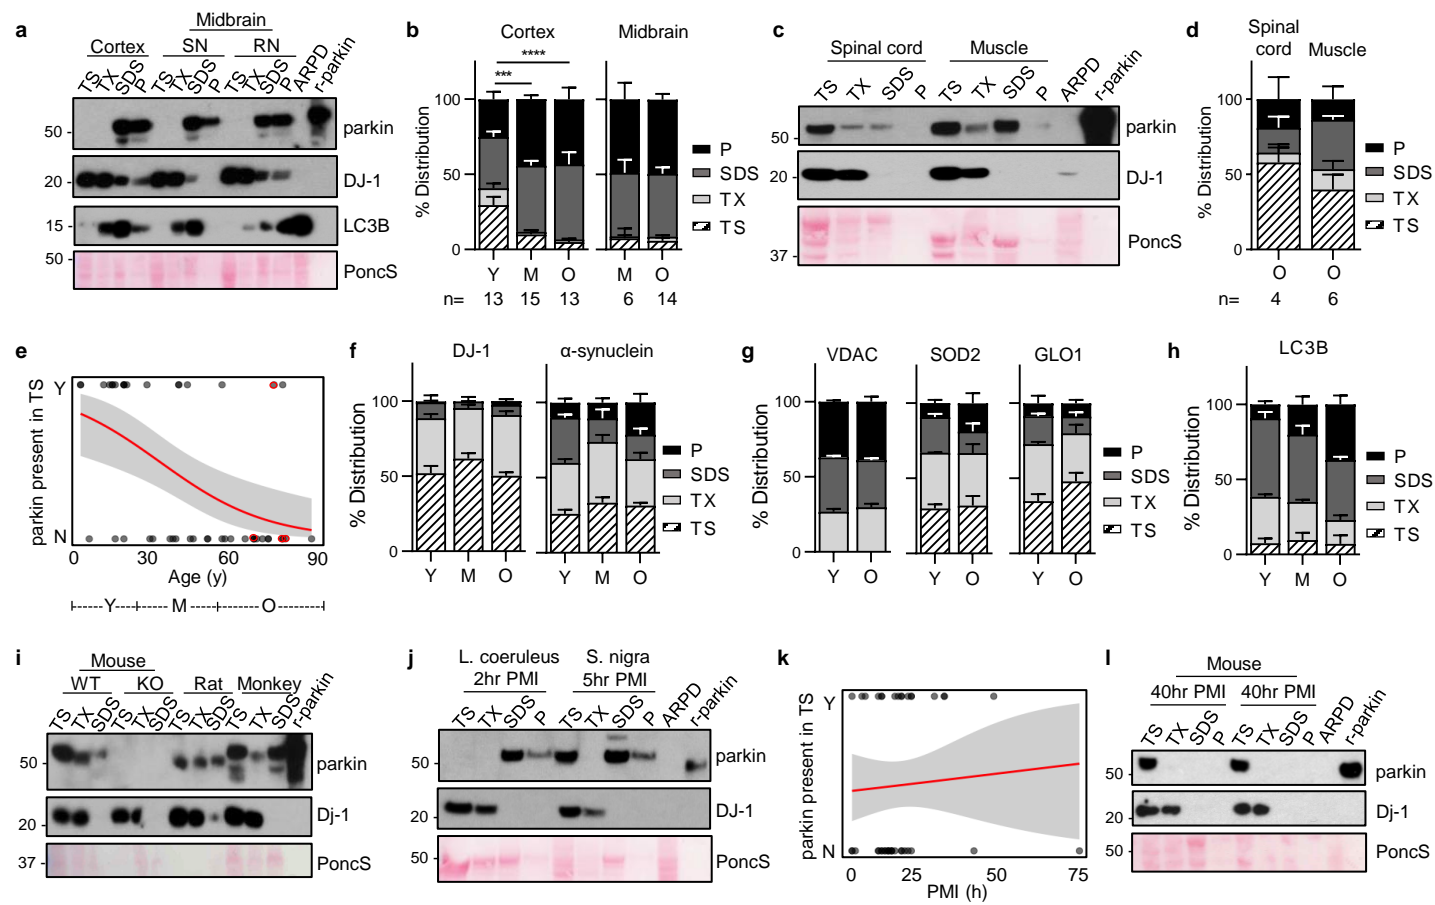

**Figure 1: Parkin's loss of solubility is specific to adult human brain and correlates with age.**



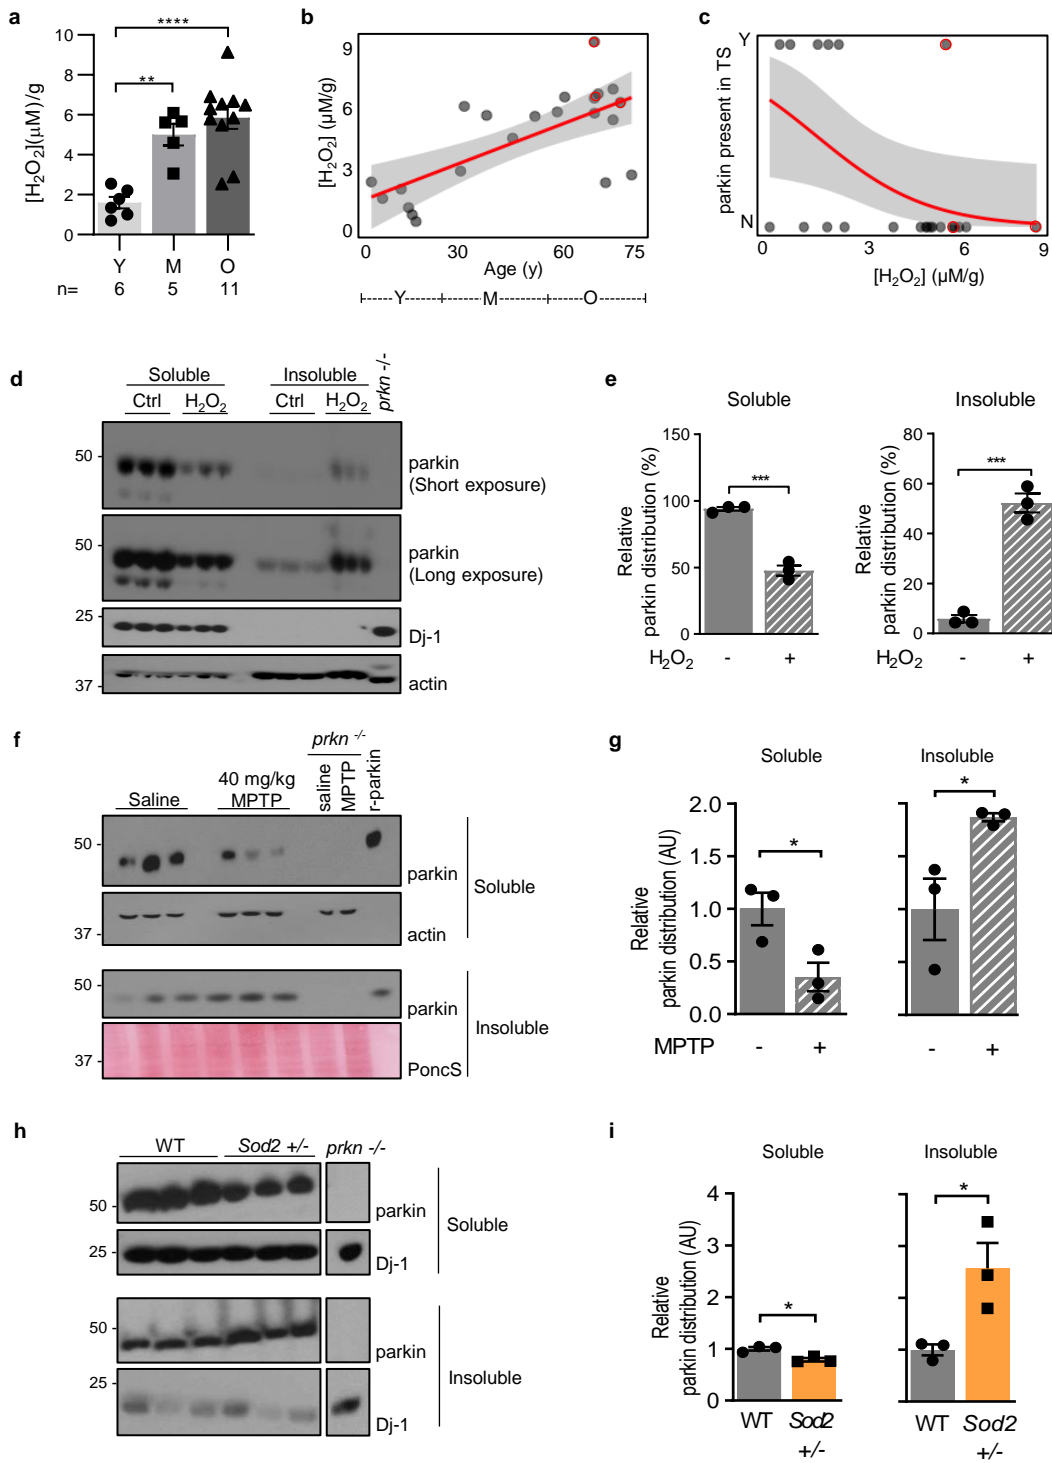

**Figure 2: Parkin's loss of solubility correlates with a rise in oxidative stress.**

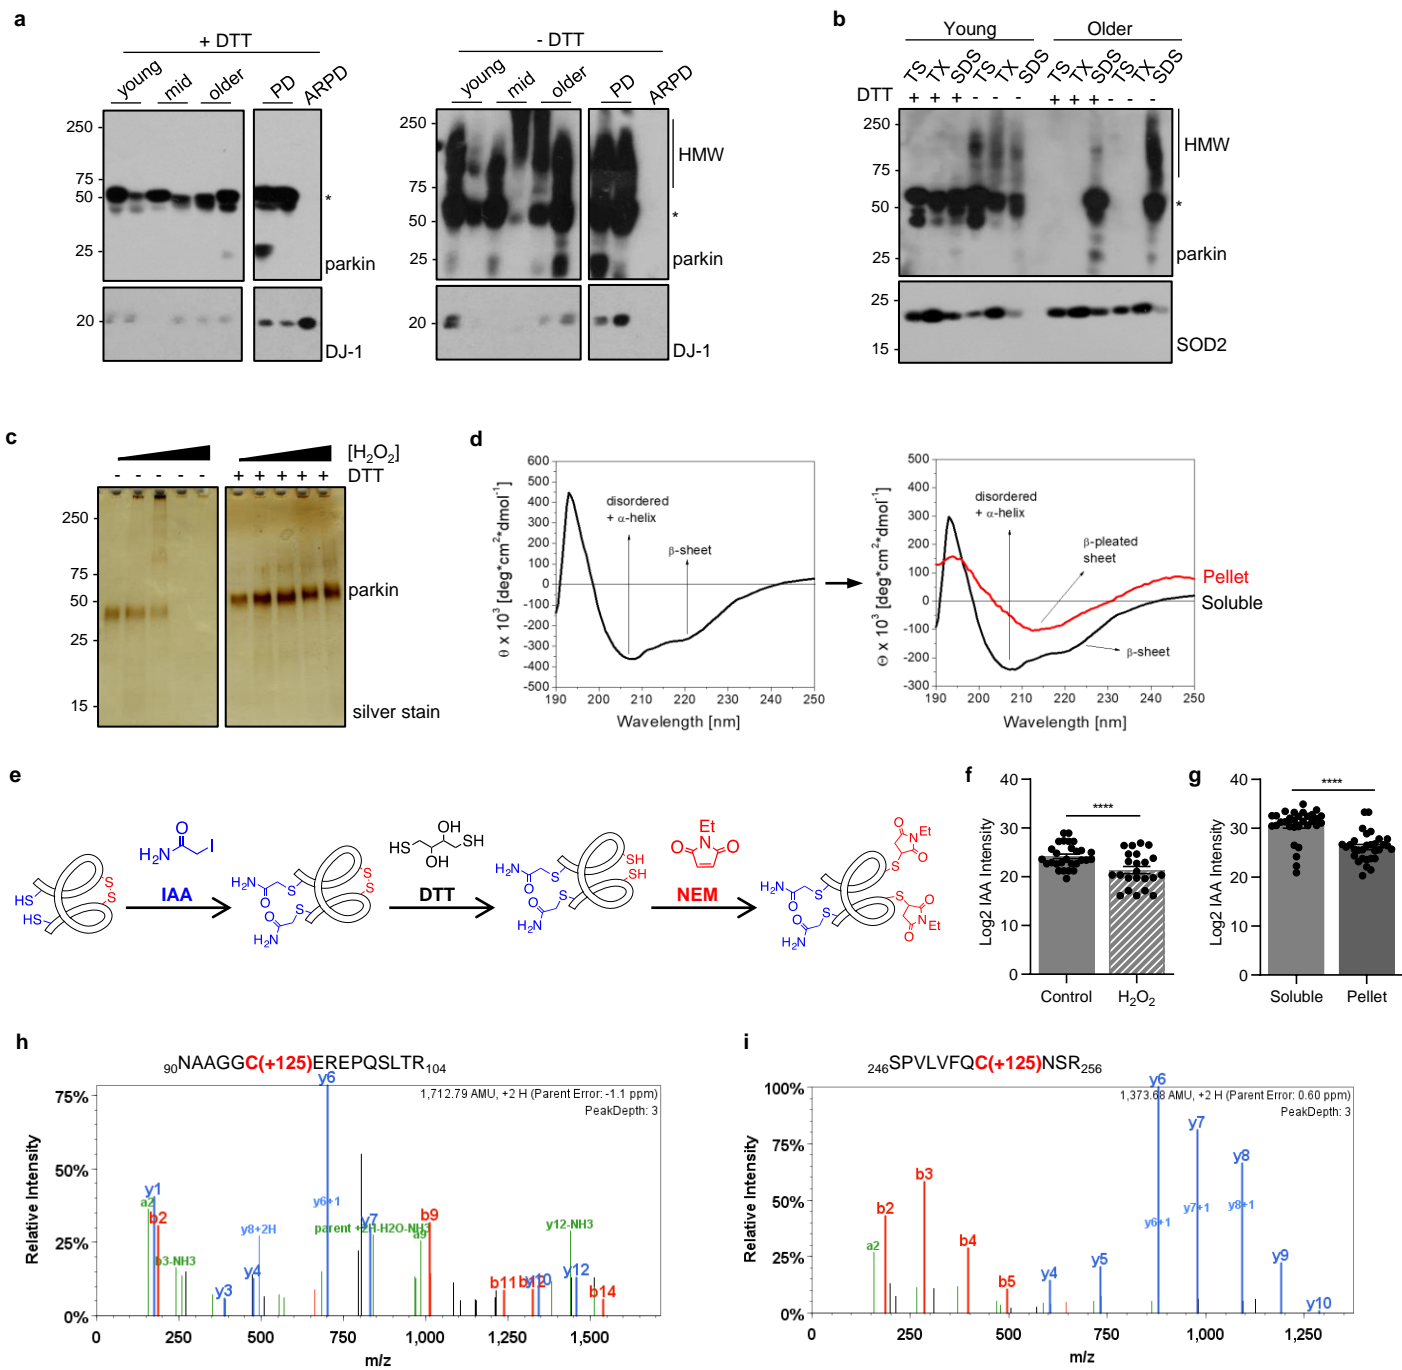

**Figure 3: Parkin's solubility and structure are altered by oxidative modifications.**

a

| Mean (range)                  | Human Brain                  |                              | Mouse Brain         |                   |
|-------------------------------|------------------------------|------------------------------|---------------------|-------------------|
|                               | TSS-extractable<br>(IP, n=4) | SDS-extractable<br>(IP, n=8) | Saline<br>(IP, n=3) | MPTP<br>(IP, n=3) |
| % Parkin protein coverage     | 46.8 (35-72)                 | 19.4 (2-58)                  | 25.0 (23-27)        | 51.5 (33-70)      |
| # Peptides identified         | 15.0 (10-23)                 | 6.4 (1-17)                   | 11.0                | 22.5 (18-27)      |
| # Cysteines identified        | 17.5 (13-26)                 | 6.1 (1-16)                   | 6.5 (6-7)           | 18.0 (10-26)      |
| # Reduced residues (=IAA-Cys) | 17.5 (13-26)                 | 6.1 (1-16)                   | 6.5 (6-7)           | 15.0 (8-22)       |
| IAA / total # Cys identified  | 17.5/26                      | 6.1/16                       | 6.5/7               | 15.0/22           |
| % of above                    | 67.3                         | 38.1                         | 92.9                | 68.2              |

b

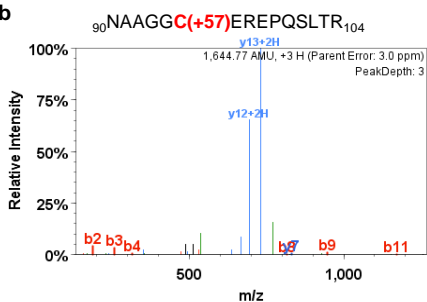

d

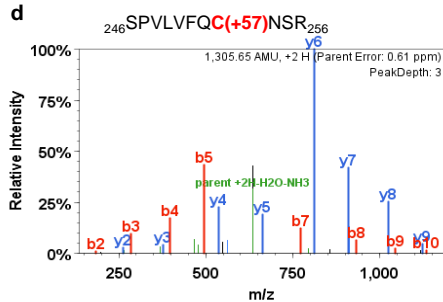

f

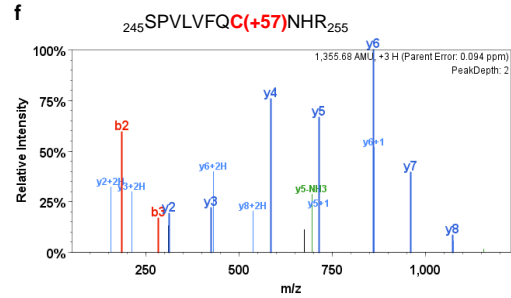

c

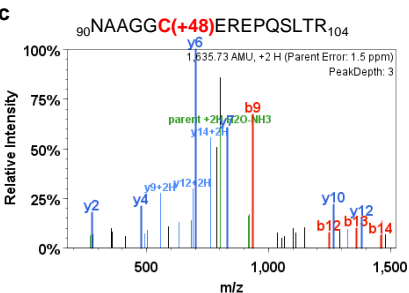

e

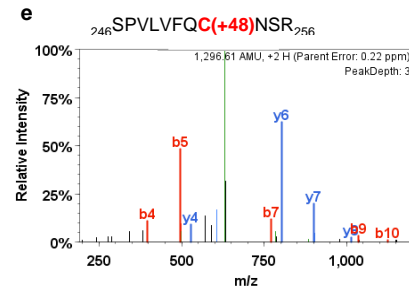

g

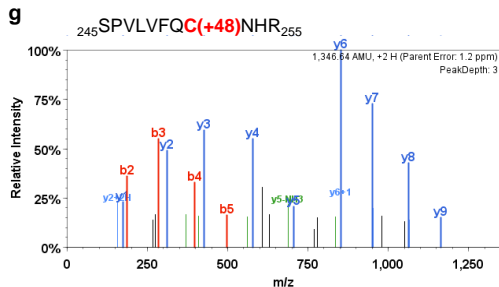

**Figure 4: Parkin cysteine residues are oxidized in human and mouse brain.**

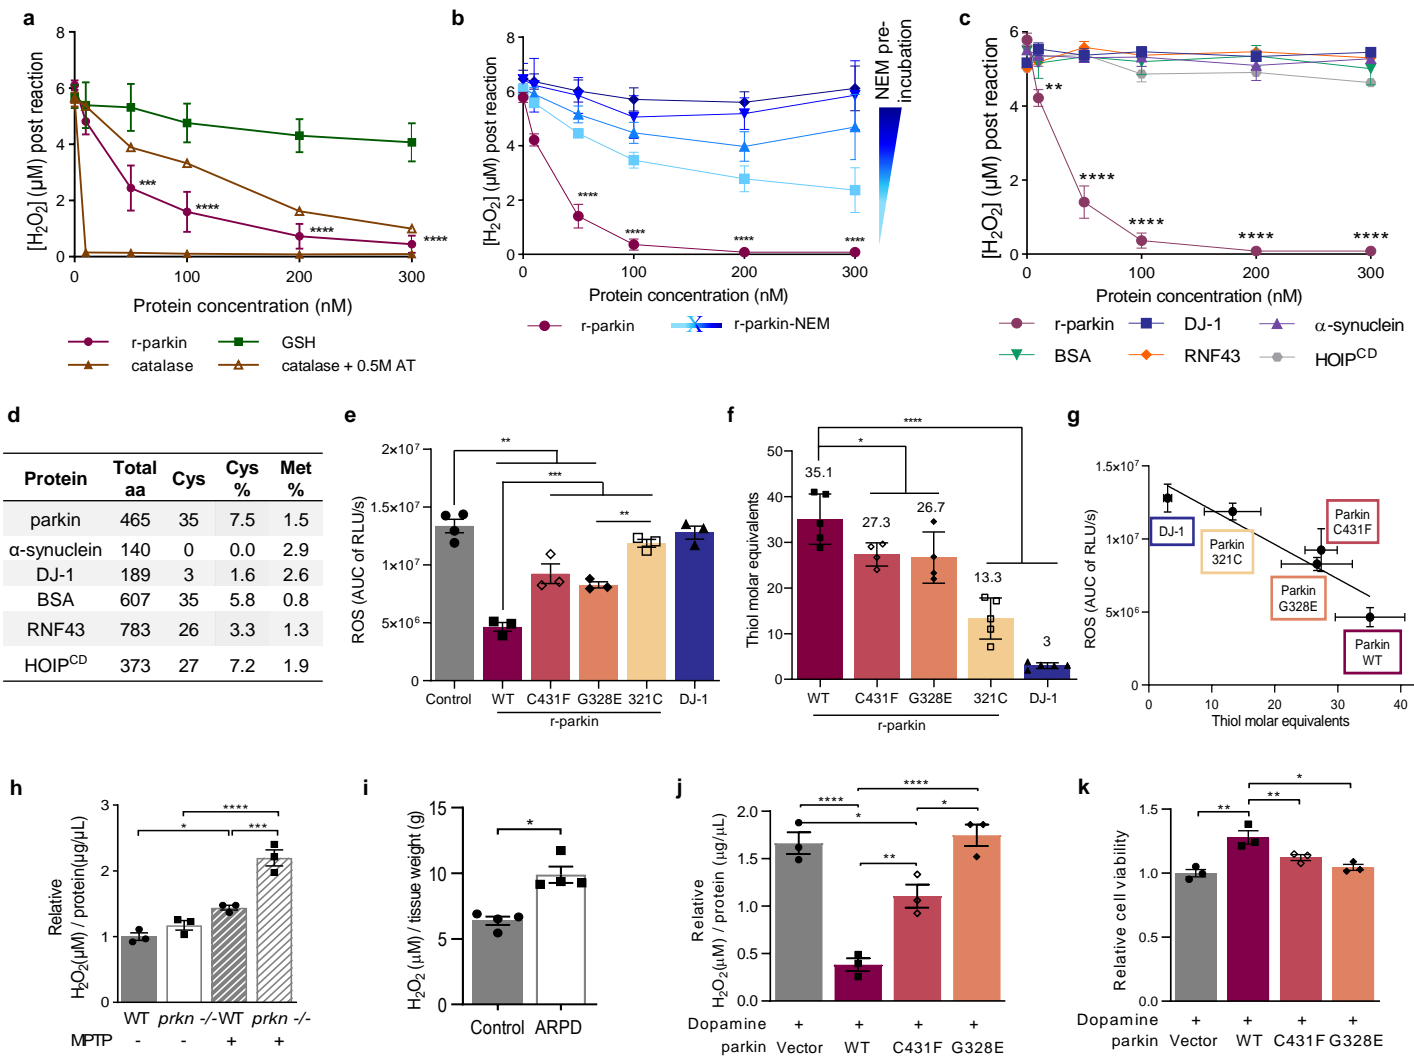

**Figure 5: Wild-type parkin lowers hydrogen peroxide *in vitro*, in cells and the brain.**

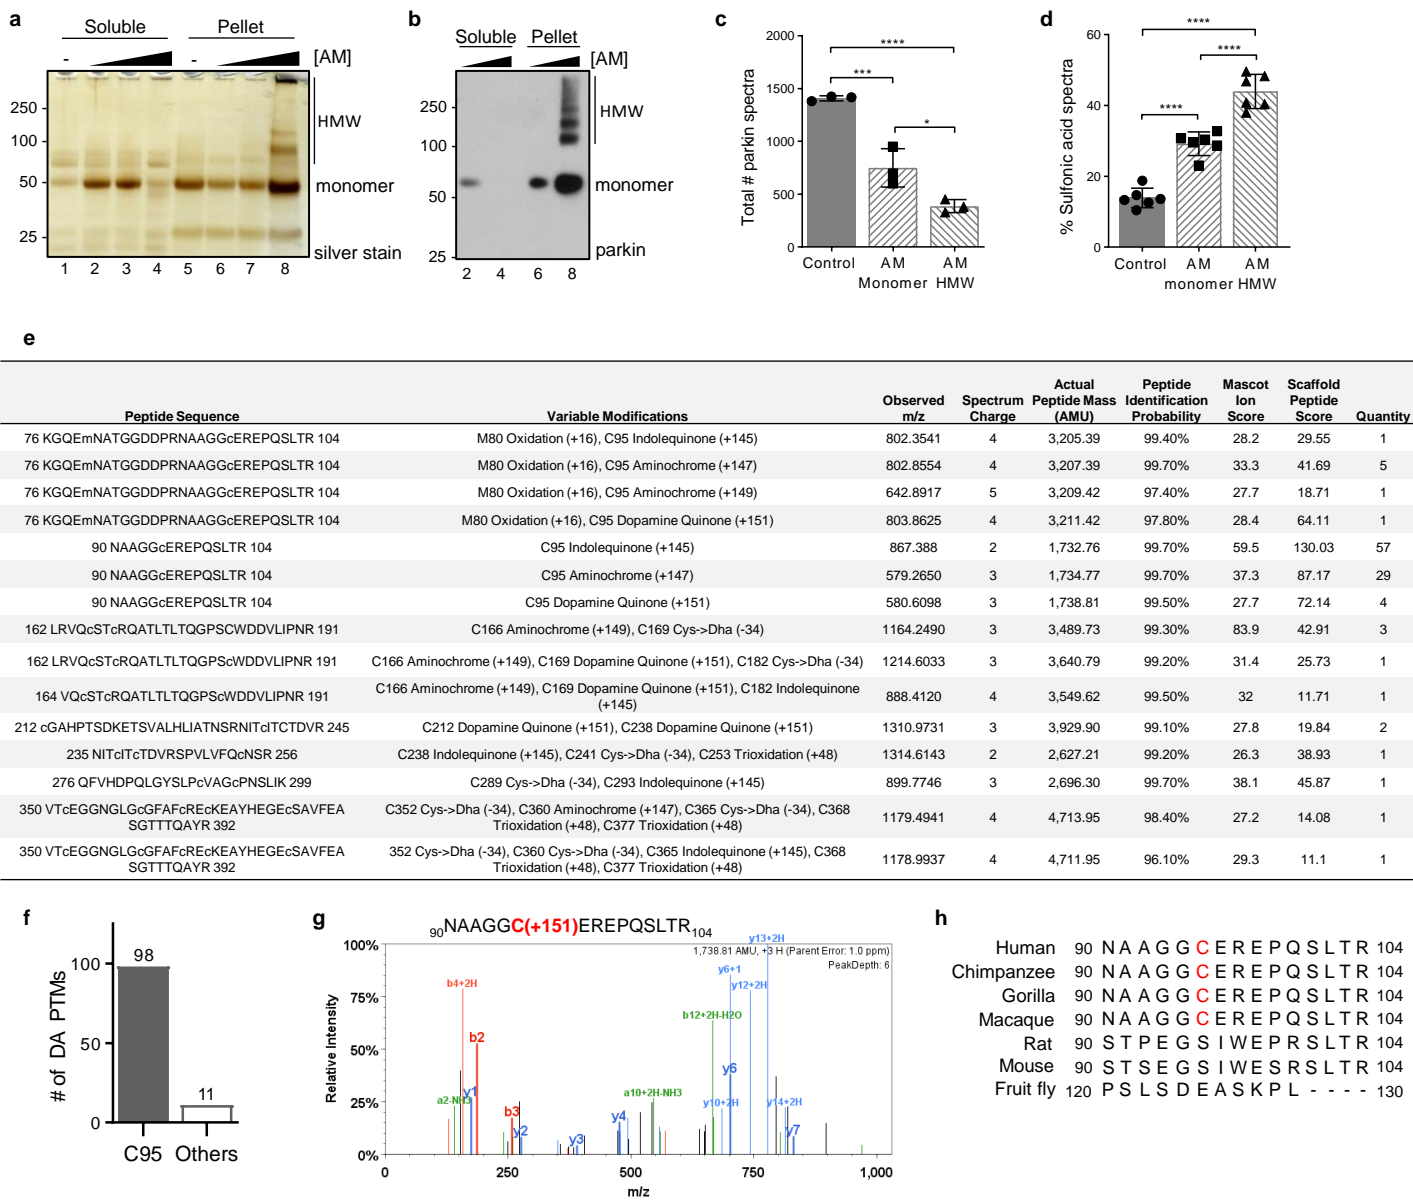

**Figure 6: Human parkin conjugates dopamine radicals foremost at residue Cys95.**

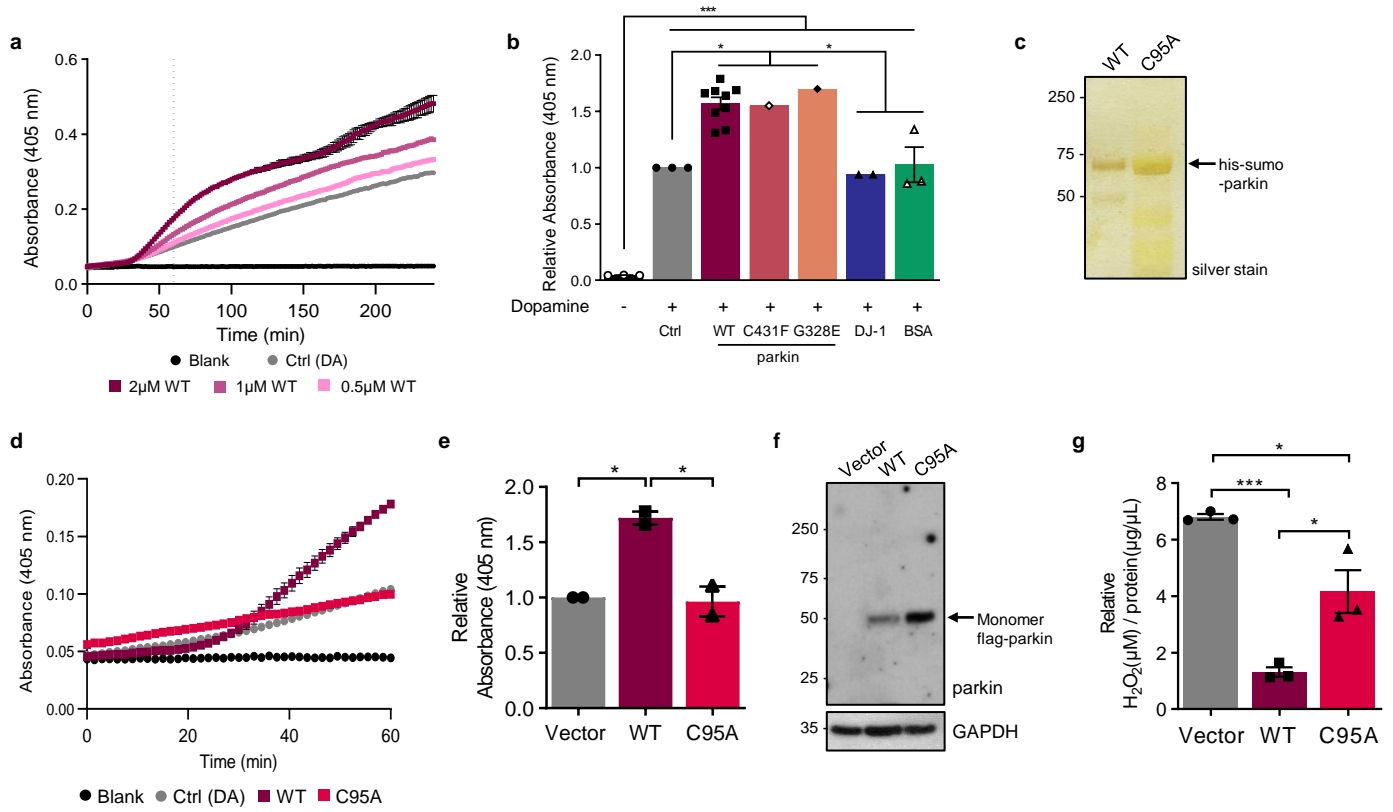

**Figure 7. Parkin-dependent increase in melanin formation requires cysteine 95.**

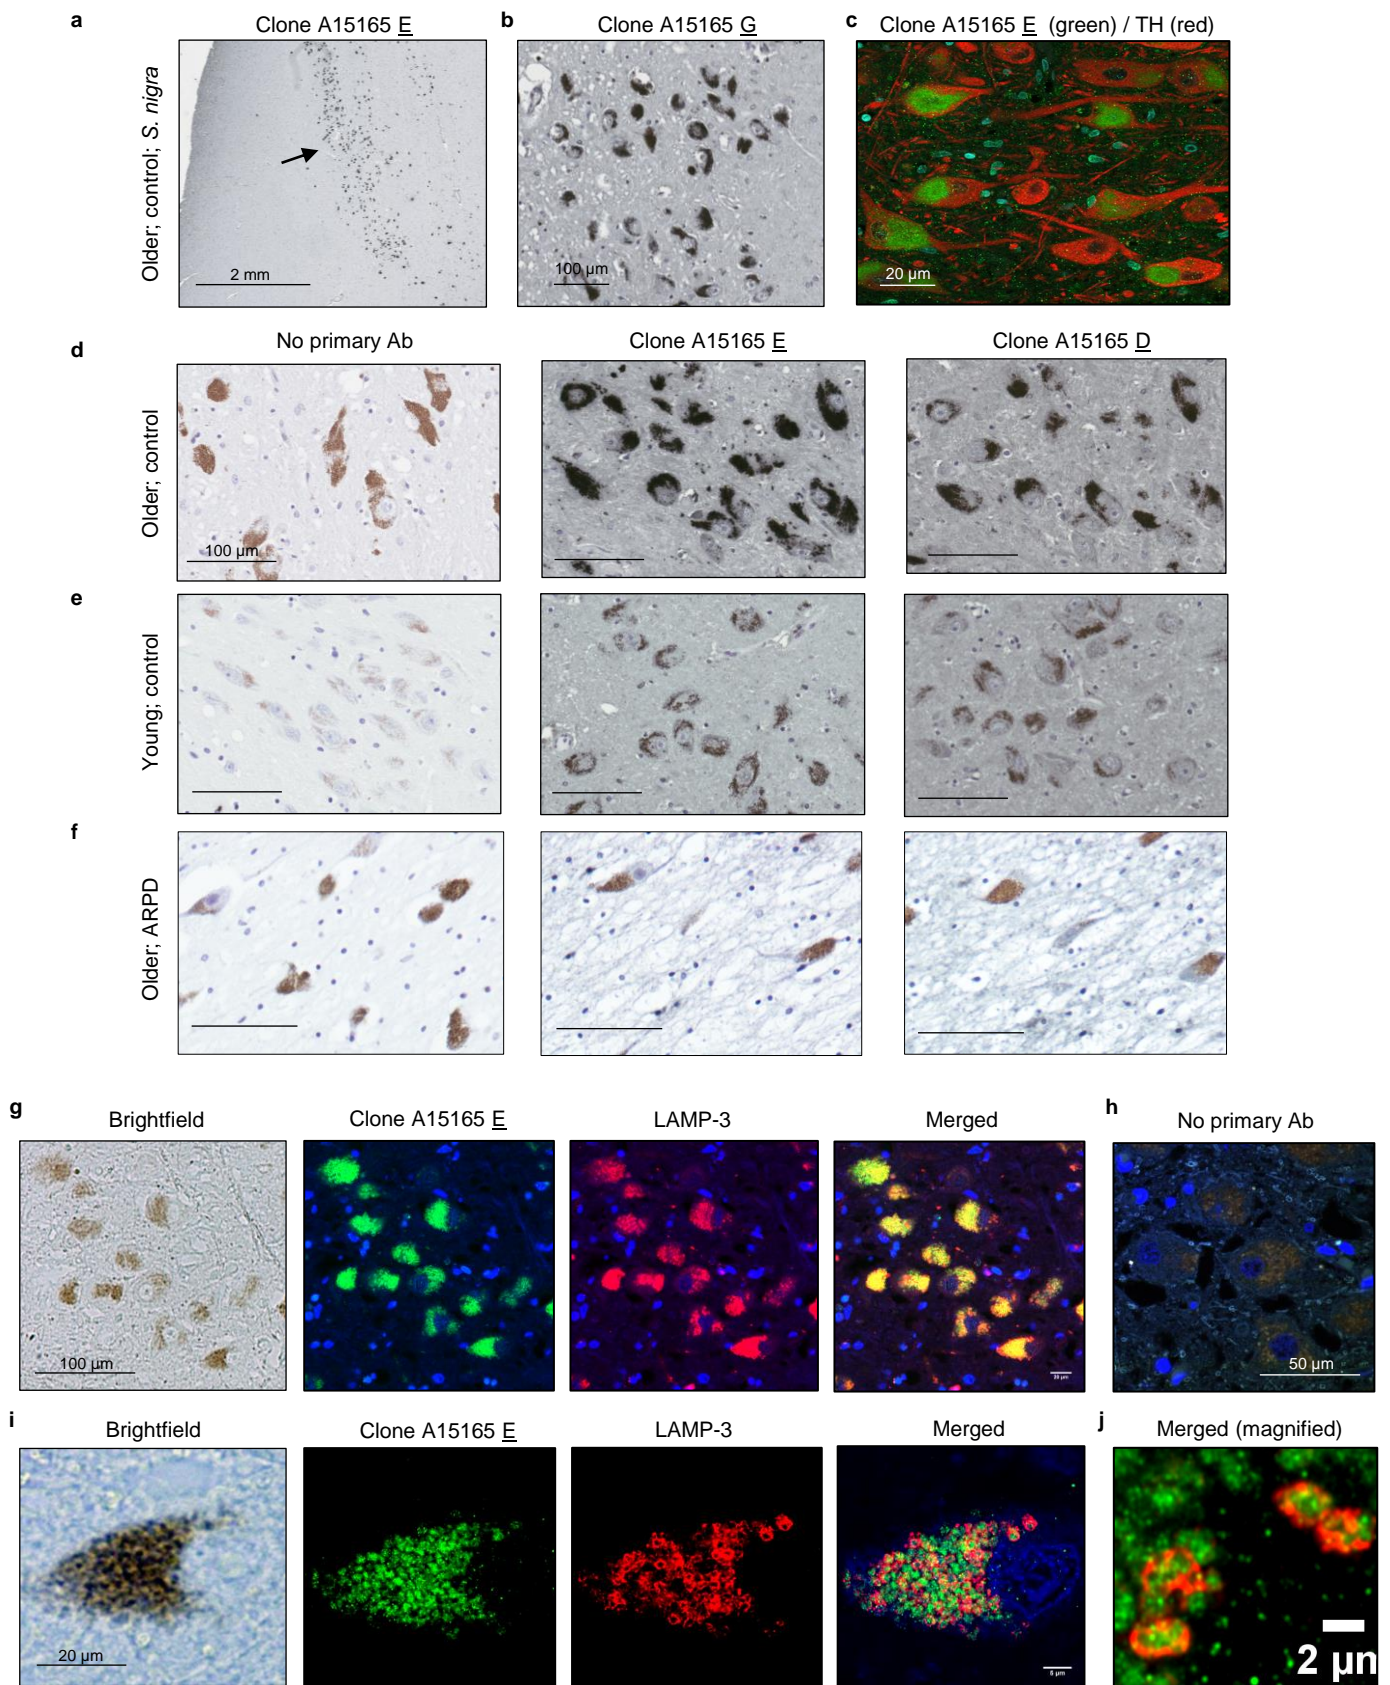

**Figure 8.** Parkin localizes to neuromelanin pigment in *S. nigra* neurons of normal human midbrain.

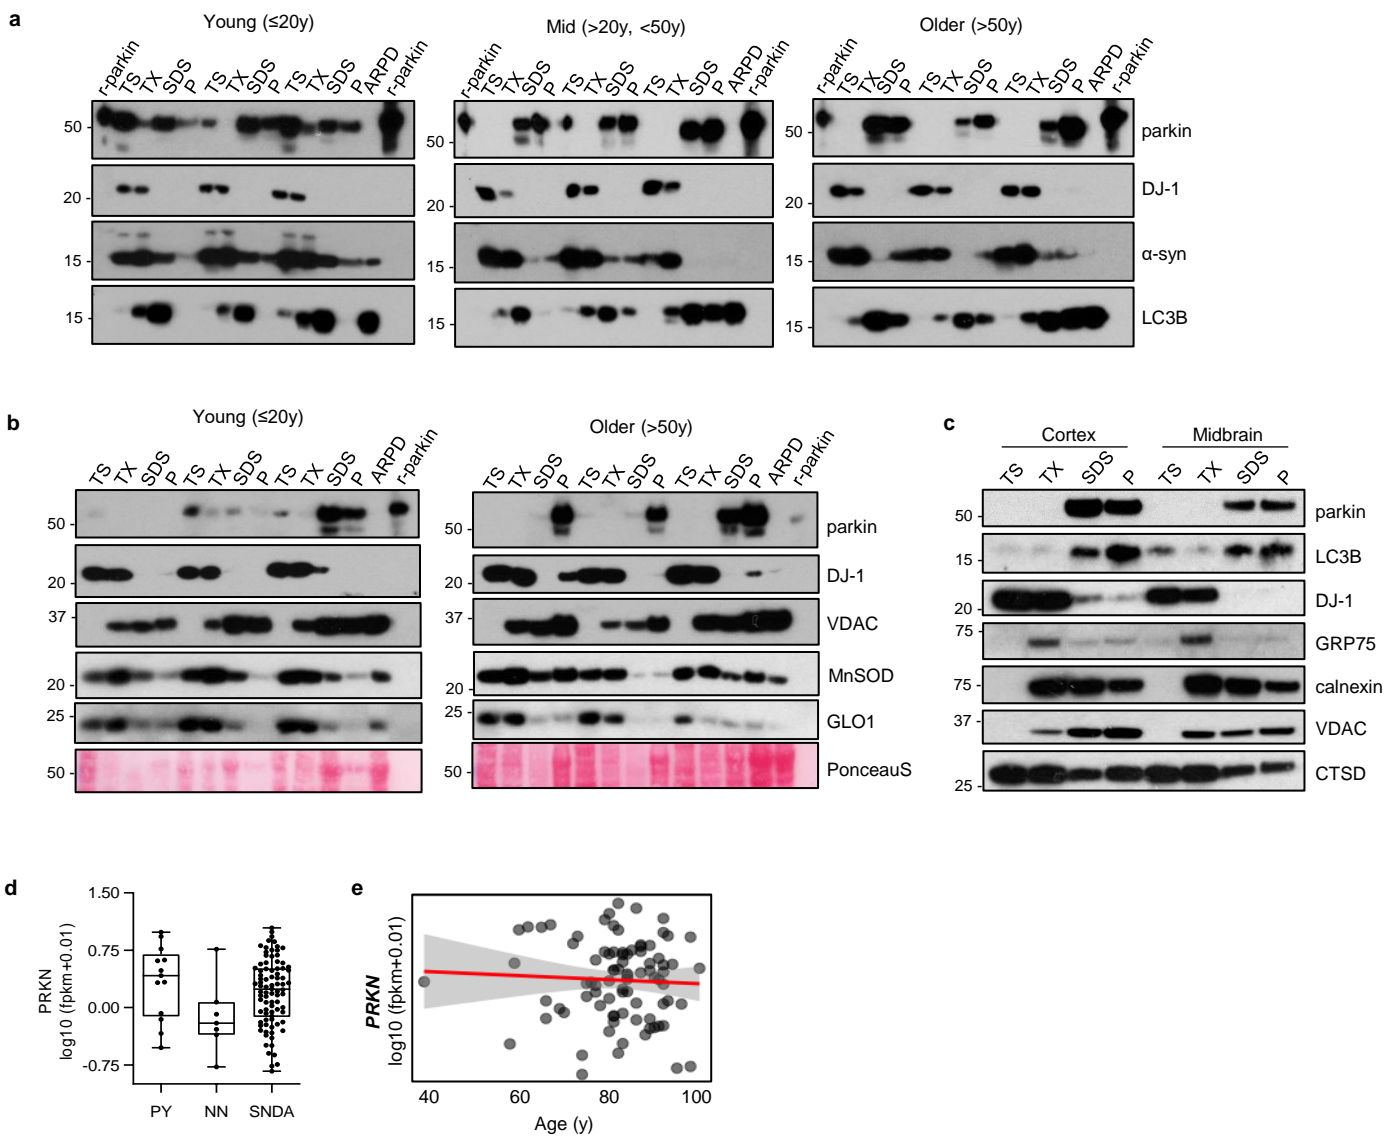

Supplemental Figure 1. Parkin becomes progressively insoluble in aged human brain.



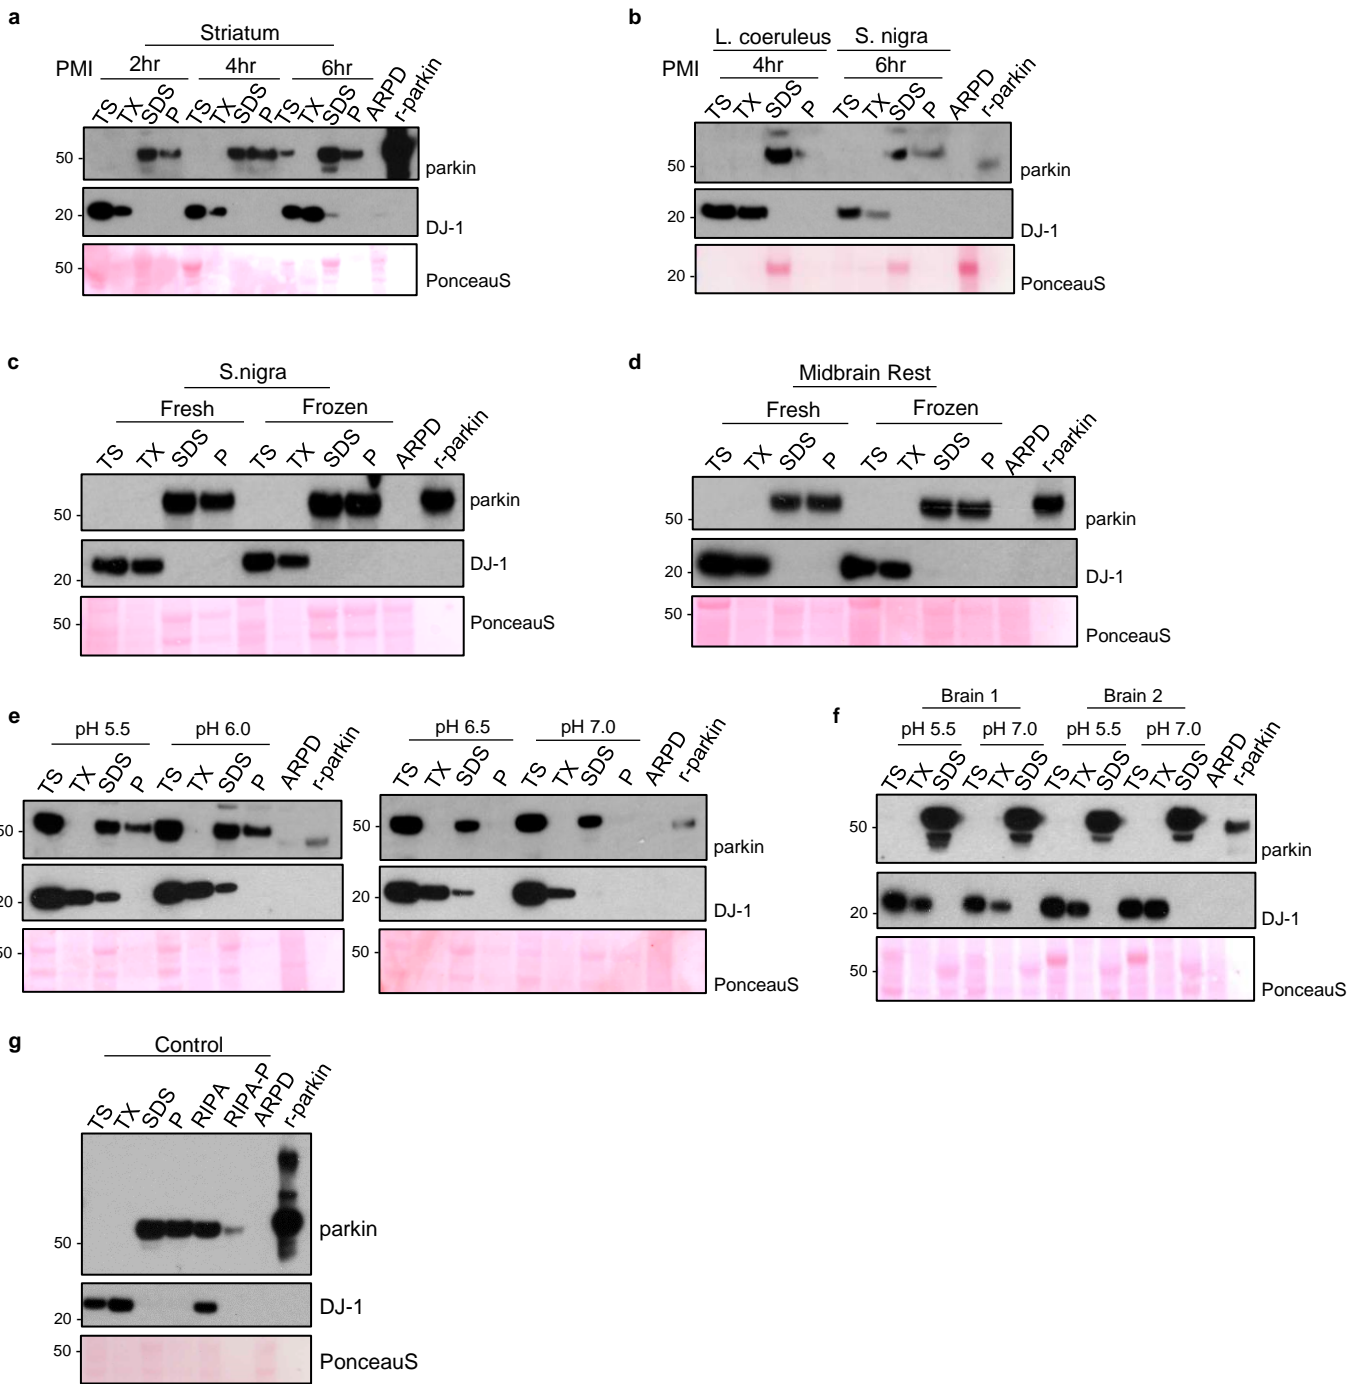

**Supplemental Figure 2. Parkin solubility is not altered by length of *post mortem* interval, tissue freezing, or pH levels of the buffer.**

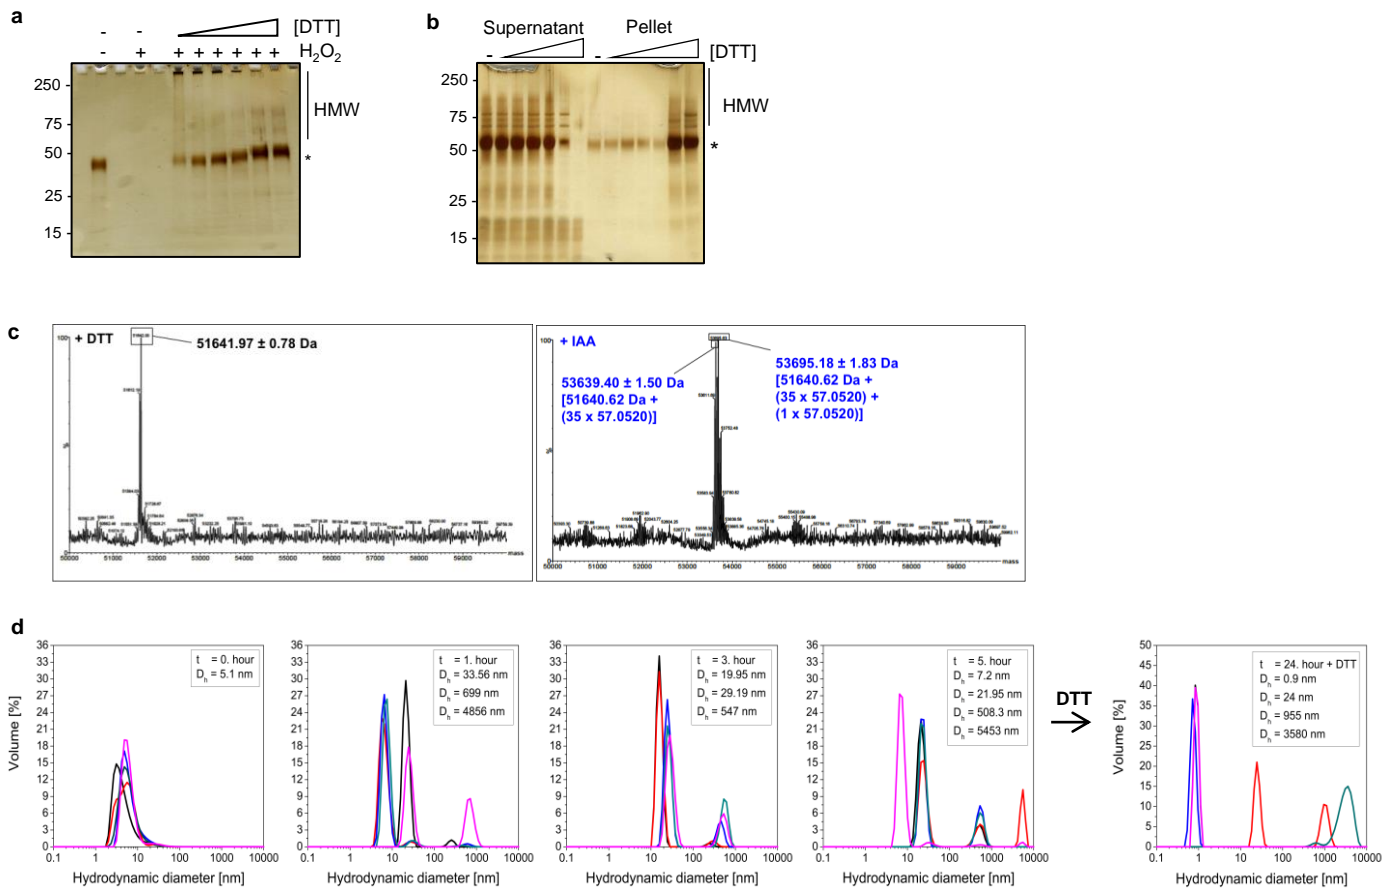

**Supplemental Figure 3. Oxidation of parkin thiols promotes insolubility.**

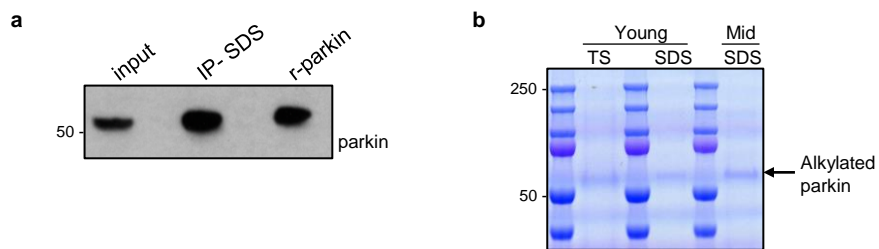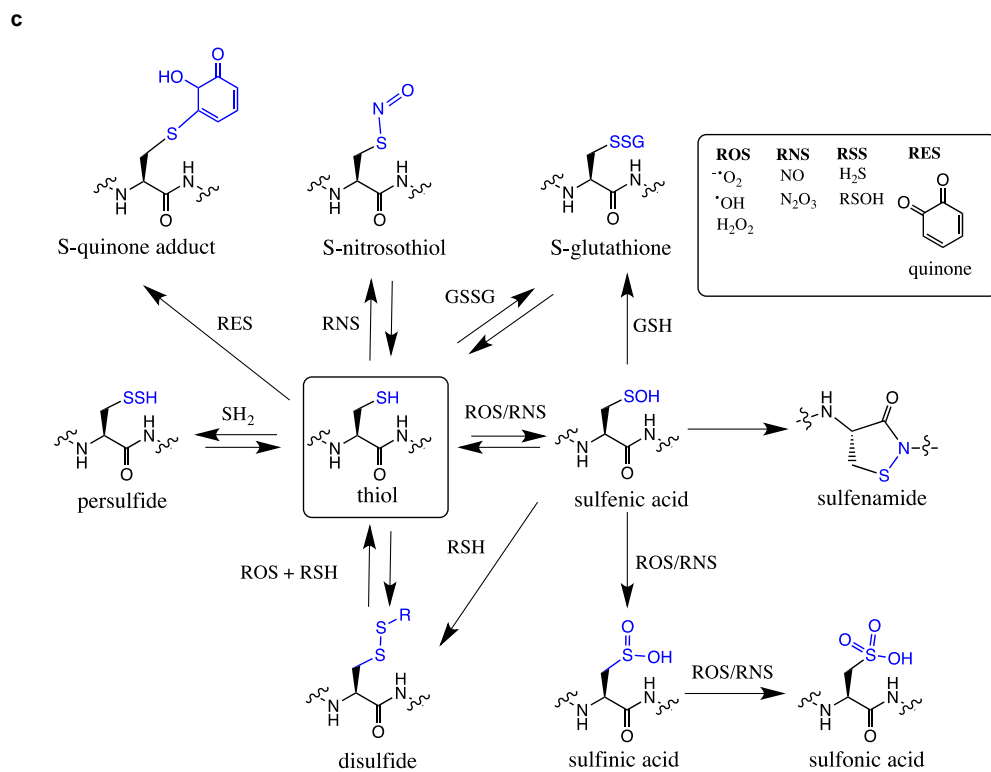

**Supplemental Figure 4. Immunoprecipitation of brain parkin and summary of redox-related thiol chemistry.**

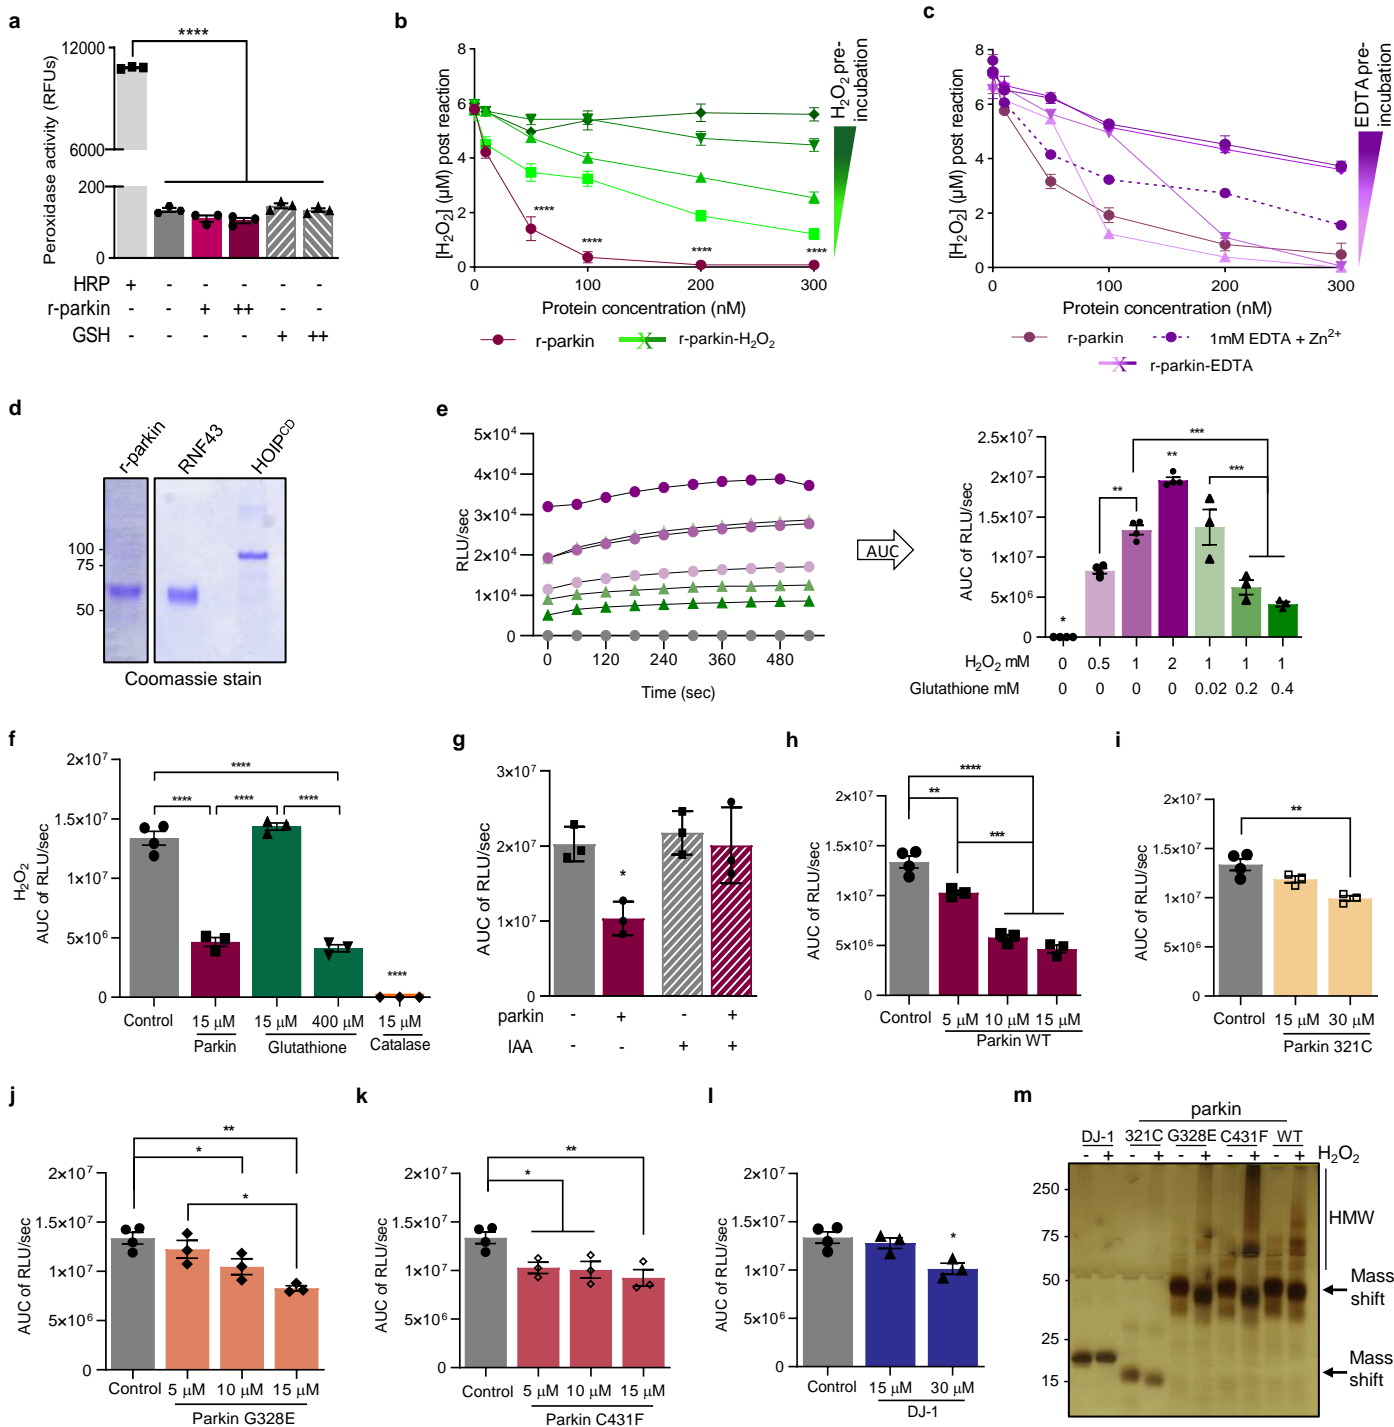

**Supplemental Figure 5. Parkin directly reduces hydrogen peroxide in a concentration- and thiol integrity-dependent but non-enzymatic manner.**

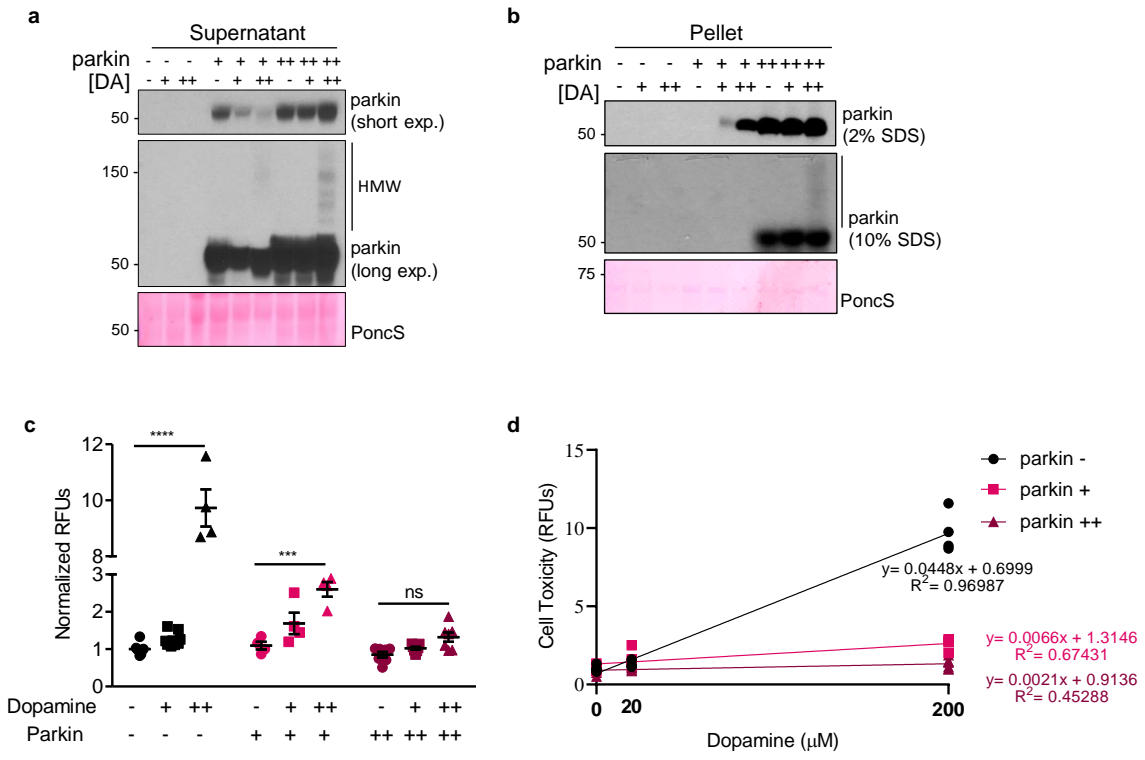

**Supplemental Figure 6. Parkin protects neural cells from dopamine toxicity in a protein concentration-dependent manner.**

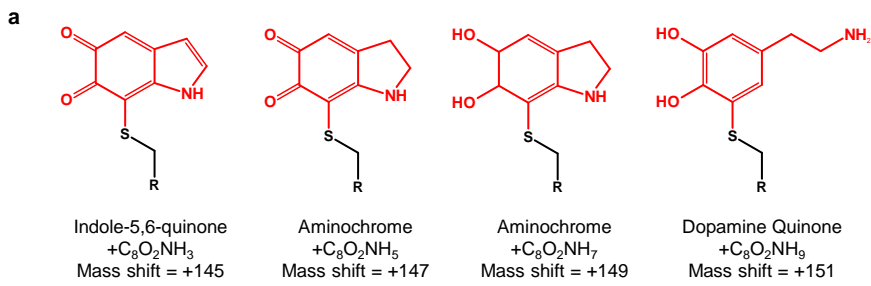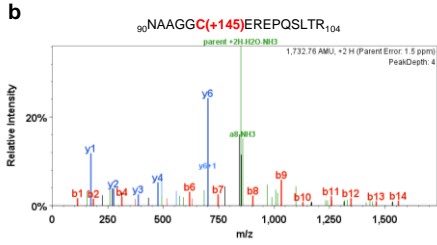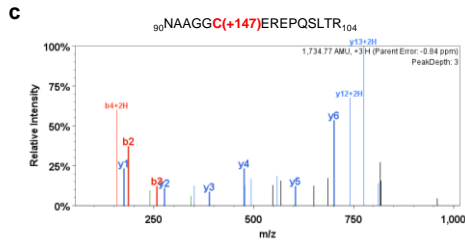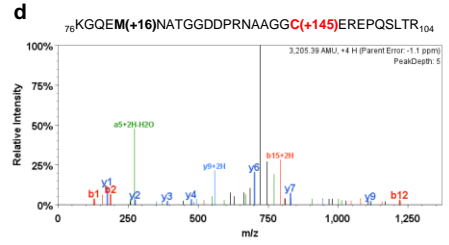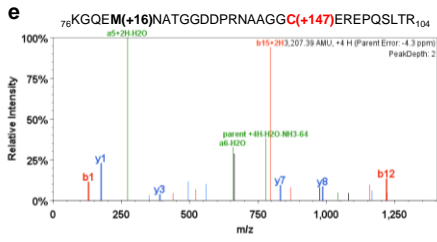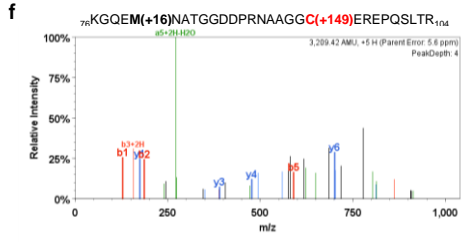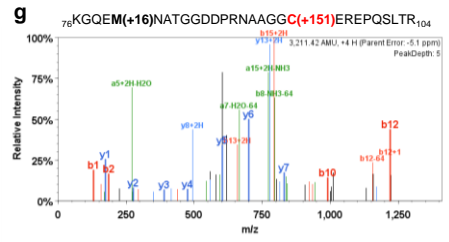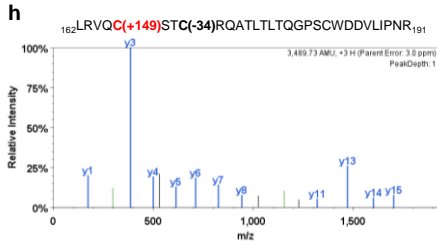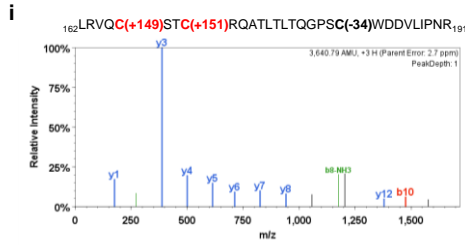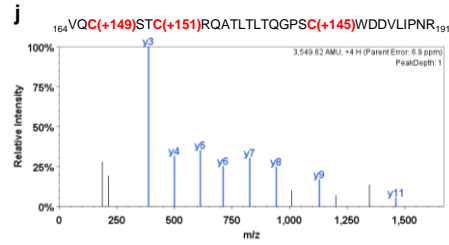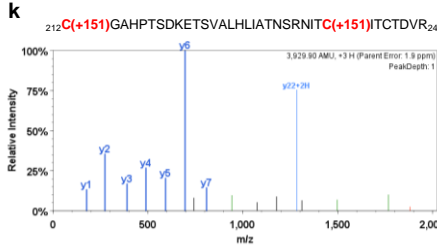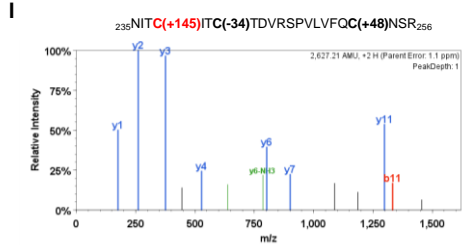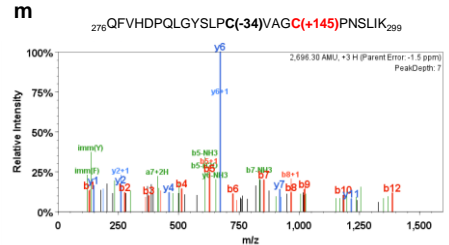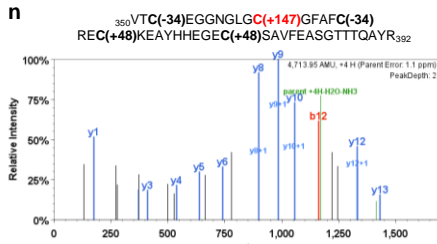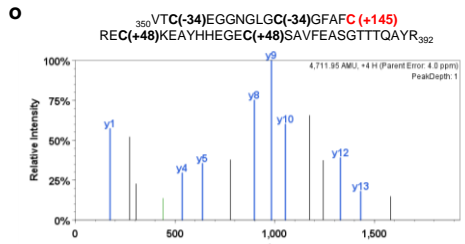

**Supplemental Figure 7. Human parkin conjugates dopamine metabolites at cysteine 95 and eight other cysteine residues.**

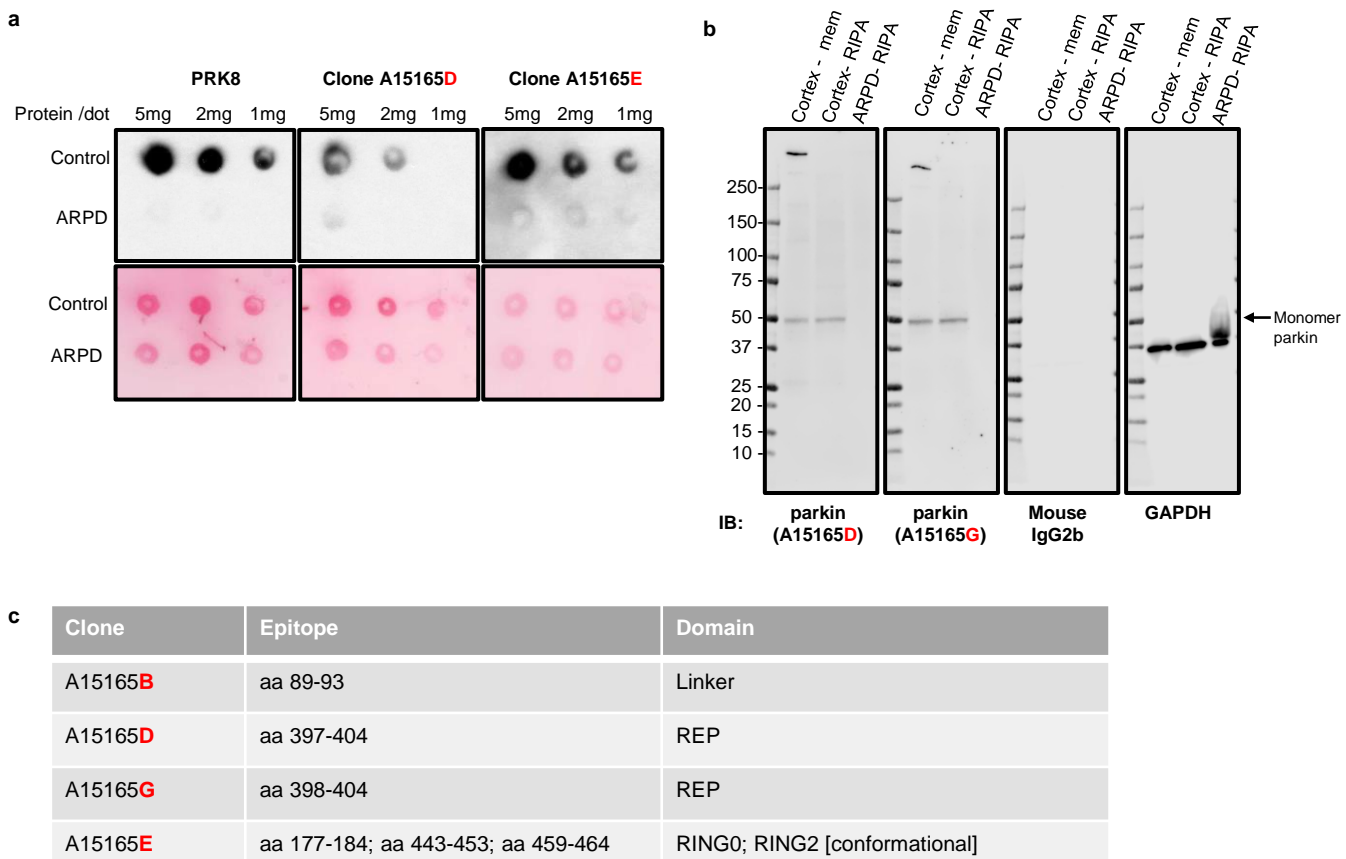

**Supplemental Figure 8. Characterization of four, new monoclonal antibodies raised in mice against human parkin.**

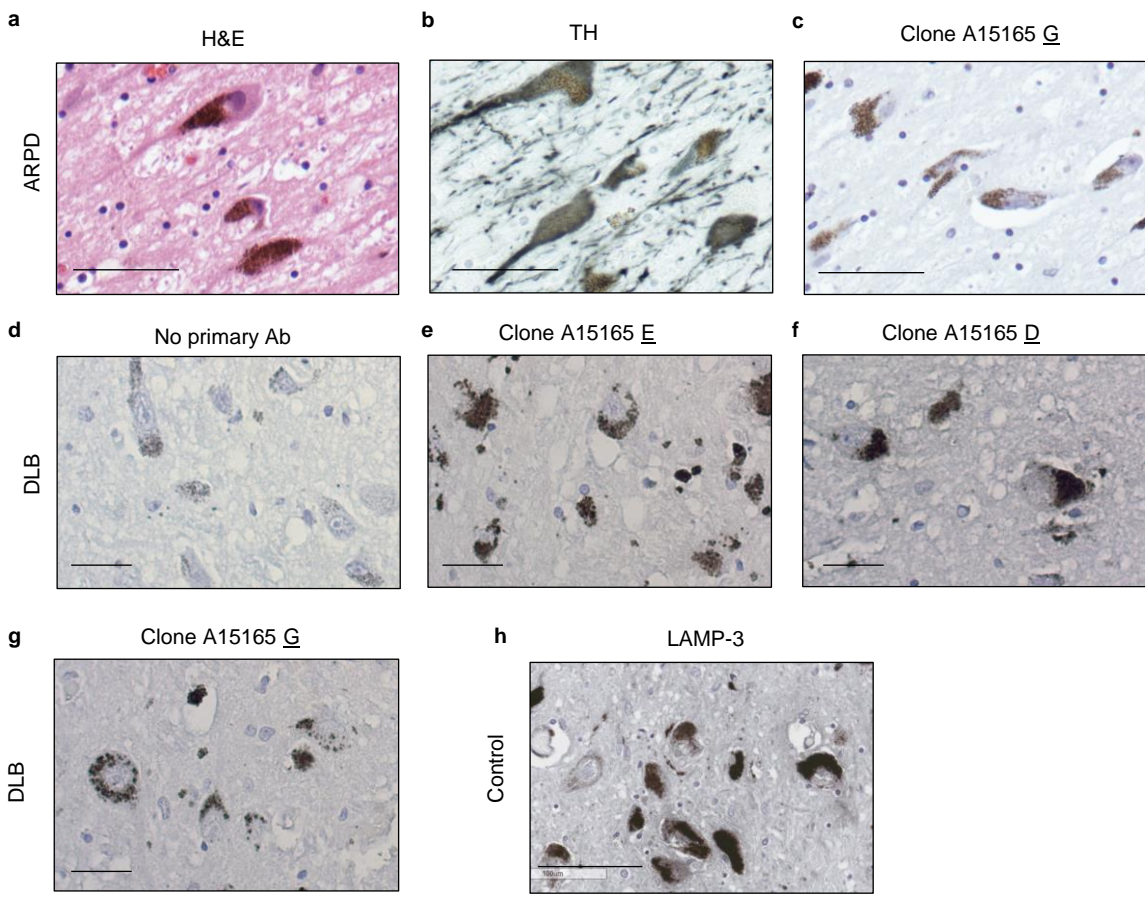

**Supplemental Figure 9. Parkin is specifically detectable in human brain sections by routine microscopy.**



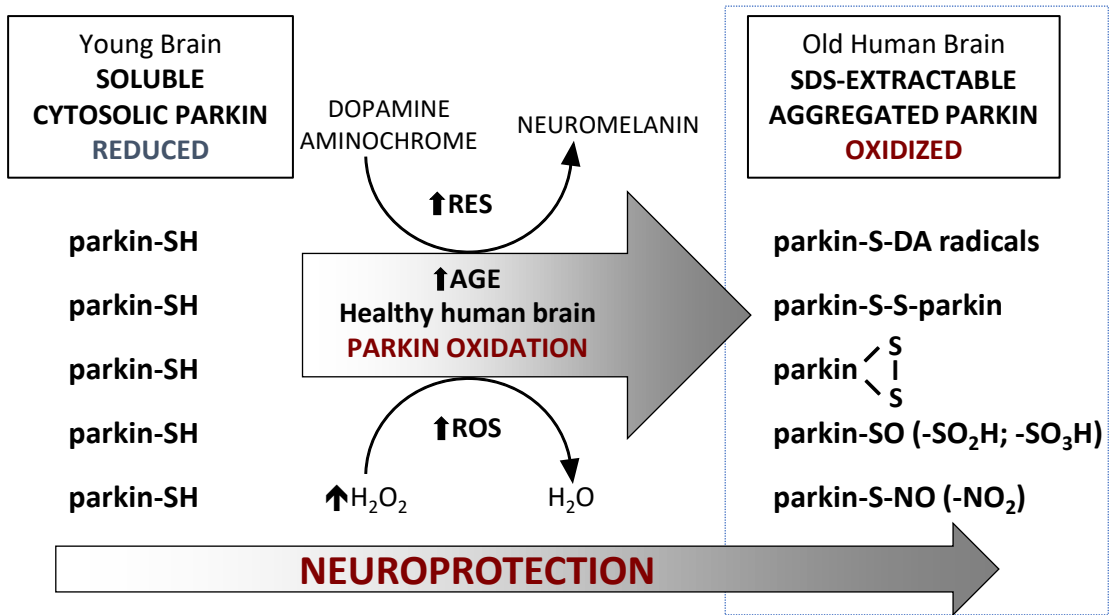

Supplemental Figure 10. Graphic summary of a working model for parkin’s redox functions in adult, human dopamine neurons.

**Supplemental Table 1. List of human tissue specimens examined in this study.**

| Sample ID | Brain region | Age | Sex | PMI (hrs) | Diagnosis                      | Parkin Solubility | H <sub>2</sub> O <sub>2</sub> / Tissue ratio | Appears in figures                                        |
|-----------|--------------|-----|-----|-----------|--------------------------------|-------------------|----------------------------------------------|-----------------------------------------------------------|
| 1         | FC           | 5   | F   | 33        | Healthy control                | 1                 |                                              | 1b, 1e, 1f, 1g, 1h, 1k, E1a, E1b                          |
| 2         | FC           | 5   | F   | 20        | Healthy control                | 1                 | 2.551                                        | 1b, 1e, 1f, 1g, 1h, 1k, 2 <sup>a</sup> , 2b, 2c, E1a, E1b |
| 3         | FC           | 8   | M   | 5         | Healthy control                | 0                 | 1.780                                        | 1b, 1e, 1k, 2a, 2b, 2c                                    |
| 4         | FC           | 13  | M   | 13        | Healthy control                | 1                 | 2.217                                        | 1b, 1e, 1f, 1k, 2a, 2b, 2c                                |
| 5         | FC           | 15  | F   | 9         | Healthy control                | 1                 | 1.349                                        | 1b, 1e, 1f, 1k, 2a, 2b, 2c                                |
| 6         | FC           | 16  | F   | 20        | Healthy control                | 1                 |                                              | 1b, 1e, 1f, 1g, 1h, E1b                                   |
| 7         | FC           | 16  | F   | 14        | Healthy control                | 1                 | 1.016                                        | 1b, 1e, 1f, 1k, 2a, 2b, 2c, E1a                           |
| 8         | FC           | 17  | M   | 23        | Healthy control                | 0                 | 0.701                                        | 1b, 1e, 1k, 2a, 2b, 2c                                    |
| 9         | FC           | 17  | M   | 22        | Healthy control                | 1                 |                                              | 1b, 1e, 1k                                                |
| 10        | FC           | 20  | F   | 19        | Healthy control                | 1                 |                                              | 1b, 1e, 1f, 1k                                            |
| 11        | FC           | 20  | M   | 8         | Healthy control                | 1                 |                                              | 1b, 1e, 1f, 1k                                            |
| 12        | FC           | 20  | M   | 6         | Healthy control                | 0                 |                                              | 1b, 1e, 1f, 1k                                            |
| 13        | FC           | 20  | M   | 5         | Healthy control                | 1                 |                                              | 1b, 1e, 1f, 1k                                            |
| 14        | FC           | 21  | M   | 30        | Healthy control                | 1                 |                                              | 1b, 1e, 1f, 1k                                            |
| 15        | FC           | 28  | M   | 33        | Epilepsy *                     | 1                 |                                              | 1b, 1e, 1f, 1k                                            |
| 16        | FC           | 29  | F   | 18        | Epilepsy *                     | 0                 | 3.061                                        | 1b, 1e, 1f, 1k, 2a, 2b, 2c, E1a                           |
| 17        | FC           | 30  | M   | 20        | Healthy control                | 0                 | 6.089                                        | 1b, 1e, 1f, 1k, 2a, 2b, 2c                                |
| 18        | FC           | 36  | M   | 20        | Healthy control                | 0                 | 5.665                                        | 1b, 1e, 1f, 1k, 2a, 2b, 2c                                |
| 19        | FC           | 37  | F   | 13        | Healthy control                | 0                 |                                              | 1b, 1e, 1f, 1k                                            |
| 20        | FC           | 38  | M   | 17        | Healthy control                | 0                 |                                              | 1b, 1e, 1f, 1k                                            |
| 21        | FC           | 39  | M   | 23        | Healthy control                | 1                 |                                              | 1b, 1e, 1f, 1k                                            |
| 22        | FC           | 39  | M   | 14        | Healthy control                | 1                 |                                              | 1b, 1e, 1f, 1k, E1a                                       |
| 23        | FC           | 42  | M   | 18        | Healthy control                | 1                 |                                              | 1b, 1e, 1f, 1k                                            |
| 24        | FC           | 43  | F   | 22        | Healthy control                | 0                 | 4.601                                        | 1b, 1e, 1f, 1k, 2a, 2b, 2c, E1a                           |
| 25        | FC           | 44  | F   | 21        | Spina bifida *                 | 0                 |                                              | 1b, 1e, 1k, E1c                                           |
| 26        | FC           | 49  | F   | 16        | Healthy control                | 0                 | 5.622                                        | 1b, 1e, 1f, 1k, 2a, 2b, 2c                                |
| 27        | FC           | 49  | F   | 14        | Healthy control                | 0                 |                                              | 1b, 1e, 1k                                                |
| 28        | FC           | 54  | M   | 16        | Alzheimer disease              | 0                 |                                              | 1b, 1e, 1f, 1k                                            |
| 29        | FC           | 54  | F   | 23        | Huntington disease             | 1                 |                                              | 1b, 1e, 1k                                                |
| 30        | FC           | 55  | F   | 16        | Healthy control                | 0                 | 5.829                                        | 1b, 1e, 1f, 1k, 2a, 2b, 2c                                |
| 31        | FC           | 56  | M   | 23        | Healthy control                | 0                 |                                              | 1b, 1e, 1f, 1g, 1h, 1k, E1b                               |
| 32        | FC           | 57  | M   | n.d.      | Healthy control                | 0                 |                                              | 1e                                                        |
| 33        | FC           | 62  | M   | 15        | Brain hemorrhage *             | 0                 | 6.525                                        | 1b, 1e, 1f, 1k, 2a, 2b, 2c, E1a                           |
| 34        | FC           | 65  | M   | 5         | Lewy body dementia             | 0                 | 6.473                                        | 1e, 1j, 1k, 1l, 1m, 2a, 2b, 2c                            |
| 35        | FC           | 65  | M   | 14        | Sporadic Parkinson's           | 0                 | 9.112                                        | 1e, 1k, 2a, 2b, 2c                                        |
| 36        | FC           | 65  | F   | 42        | Healthy control                | 0                 | 5.768                                        | 1a, 1b, 1e, 1k, 2a, 2b, 2c, E2e                           |
| 37        | FC           | 66  | M   | n.d.      | Healthy control                | 0                 | 6.674                                        | 1b, 1e, 1f, 2a, 2b, 2c, E1a                               |
| 38        | FC           | 68  | M   | 17        | Healthy control                | 0                 | 2.514                                        | 1b, 1e, 1f, 1g, 1h, 1k, 2a, 2b, 2c, E1b                   |
| 39        | FC           | 70  | F   | n.d.      | Healthy control                | 0                 | 6.897                                        | 1b, 1e, 1f, 2a, 2b, 2c, E1a                               |
| 40        | FC           | 70  | M   | n.d.      | Healthy control                | 0                 | 5.459                                        | 1b, 1e, 1f, 1g, 1h, 2a, 2b, 2c, E1b                       |
| 41        | FC           | 72  | M   | n.d.      | Lewy body dementia             | 1                 | 6.274                                        | 1e, 2a, 2b, 2c                                            |
| 42        | FC           | 75  | M   | 48        | Healthy control                | 1                 | 2.878                                        | 1b, 1e, 1k, 2a, 2b, 2c                                    |
| 43        | FC           | 75  | F   | 13        | Ischaemic stroke *             | 0                 |                                              | 1b, 1e, 1f, 1k                                            |
| 44        | FC           | 75  | M   | 17        | Lewy body dementia             | 0                 |                                              | 1e, 1j, 1k                                                |
| 45        | FC           | 76  | M   | 74        | Pick's disease                 | 0                 |                                              | 1e, 1k                                                    |
| 46        | FC           | 85  | F   | 15        | Alzheimer disease              | 0                 |                                              | 1b, 1e, 1f, 1j, 1k                                        |
| ARPD1     | FC           | 66  | M   | 17        | PRKN-linked Parkinson's        | n/a               |                                              |                                                           |
| ARPD2     | FC           | 57  | M   | 31        | PRKN-linked Parkinson's        | n/a               |                                              |                                                           |
| ARPD3     | FC           | 70  | F   | 42        | PRKN-linked Parkinson's        | n/a               |                                              |                                                           |
| ARPD4     | FC           | 70  | M   | 13        | PRKN-linked Parkinson's        | n/a               |                                              |                                                           |
| 47        | MB           | 26  | M   | 2         | Multiple sclerosis *           | 0                 |                                              | 1b, E2b                                                   |
| 65        | MB           | 34  | M   | n.d.      | Encephalitis*                  | 0                 |                                              | 1b                                                        |
| 25        | MB           | 44  | F   | 21        | Healthy control                | 0                 |                                              | 1b                                                        |
| 48        | MB           | 44  | F   | 5         | Multiple sclerosis *           | 1                 |                                              | 1c, E2b                                                   |
| 49        | MB           | 45  | M   | 13        | Ischaemic stroke *             | 0                 |                                              | 1b                                                        |
| 50        | MB           | 47  | F   | 20        | Brain hemorrhage *             | 0                 |                                              | 1b                                                        |
| 51        | MB           | 56  | M   | 44        | Multiple system atrophy        | 0                 |                                              | 1b                                                        |
| 52        | MB           | 60  | M   | 16        | Progressive supranuclear palsy | 0                 |                                              | 1b                                                        |
| 53        | MB           | 61  | M   | 20        | Healthy control                | 1                 |                                              | 1b                                                        |
| 54        | MB           | 61  | M   | 3.5       | Multiple sclerosis *           | 0                 |                                              | 1b                                                        |
| 36        | MB           | 65  | F   | 42        | Healthy control                | 0                 |                                              | 1b, E2a                                                   |
| 55        | MB           | 65  | M   | 6         | Multiple sclerosis *           | 0                 |                                              | 1b                                                        |
| 64        | MB           | 71  | M   | n.d.      | Lewy body dementia             | 0                 |                                              | 1b                                                        |
| 41        | MB           | 72  | M   | n.d.      | Lewy body dementia             | 1                 |                                              | 1b                                                        |
| 56        | MB           | 74  | F   | n.d.      | Amyotrophic lateral sclerosis  | 0                 |                                              | 1b                                                        |
| 42        | MB           | 75  | M   | 48        | Healthy control                | 0                 |                                              | 1b                                                        |
| 57        | MB           | 75  | M   | 70        | Sporadic Parkinson's           | 0                 |                                              | 1b                                                        |
| 45        | MB           | 76  | M   | 74        | Pick's disease                 | 0                 |                                              | 1b                                                        |
| 58        | MB           | 79  | M   | n.d.      | Progressive supranuclear palsy | 0                 |                                              | 1b                                                        |
| 59        | MB           | 82  | M   | 48        | Lewy body dementia             | 1                 |                                              | 1b                                                        |
| 60        | SC/Muscle    | 68  | F   | 2.5       | Ischaemic stroke *             | 1                 |                                              | 1c, 1d                                                    |
| 61        | SC/Muscle    | 64  | F   | 2         | Subarachnoid hemorrhage*       | 1                 |                                              | 1d                                                        |
| 62        | SC/Muscle    | 74  | M   | 2         | Cerebellar hemorrhage *        | 1                 |                                              | 1d                                                        |
| 63        | SC/Muscle    | 50  | M   | 4         | Subarachnoid hemorrhage *      | 1                 |                                              | 1d                                                        |

**Supplemental Table 2: Parkin's cysteine residues are redox active.**

|                           | Treatment        | Control | Control | H <sub>2</sub> O <sub>2</sub> | H <sub>2</sub> O <sub>2</sub> | H <sub>2</sub> O <sub>2</sub> | H <sub>2</sub> O <sub>2</sub> | H <sub>2</sub> O <sub>2</sub> |
|---------------------------|------------------|---------|---------|-------------------------------|-------------------------------|-------------------------------|-------------------------------|-------------------------------|
|                           | Run              | IAA+NEM | IAA     | 20μM                          | 1mM                           | 4.5mM                         | 4.5mM                         | 4.5mM                         |
| Region                    | Cysteine Residue |         |         |                               |                               |                               |                               |                               |
| UBL                       | 59               |         | •       | n/d                           | •                             | • +                           | •                             | •                             |
| Linker                    | 95               | •       | •       | •                             | •                             | • +                           | • +                           | • +                           |
| RING0                     | 150              | •       | •       | •                             | •                             | • +                           | • +                           | •                             |
|                           | 154              | •       | •       | n/d                           | •                             | • +                           | • +                           | •                             |
|                           | 166              | n/d     | n/d     | •                             | • +                           | n/d                           | •                             | •                             |
|                           | 169              | n/d     | •       | •                             | • +                           | n/d                           | •                             | •                             |
|                           | 182              | •       | •       | •                             | n/d                           | • +                           | • +                           | •                             |
|                           | 196              | •       | •       | •                             | •                             | • +                           | • +                           | • +                           |
|                           | 201              | •       | •       | •                             | •                             | • +                           | • +                           | • +                           |
|                           | 212              | •       | •       | •                             | n/d                           | • +                           | • +                           | • +                           |
| RING1                     | 238              | •       | •       | • +                           | •                             | • +                           | •                             | • +                           |
|                           | 241              | •       | •       | • +                           | •                             | • +                           | •                             | •                             |
|                           | 253              | •       | •       | • +                           | •                             | • +                           | •                             | •                             |
|                           | 260              | •       | •       | n/d                           | n/d                           | • +                           | •                             | •                             |
|                           | 263              | •       | •       | n/d                           | n/d                           | • +                           | •                             | •                             |
|                           | 268              | •       | •       | n/d                           | n/d                           | • +                           | •                             | •                             |
|                           | 289              | •       | •       | n/d                           | n/d                           | • +                           | • +                           | • +                           |
|                           | 293              | •       | •       | n/d                           | •                             | •                             | • +                           | • +                           |
| 323                       | •                | •       | n/d     | n/d                           | • +                           | • +                           | • +                           |                               |
| IBR                       | 332              | •       | •       | n/d                           | n/d                           | • +                           | •                             | •                             |
|                           | 337              | •       | •       | n/d                           | •                             | • +                           | •                             | • +                           |
|                           | 352              | •       | •       | •                             | •                             | •                             | • +                           | • +                           |
|                           | 360              | •       | •       | •                             | •                             | • +                           | •                             | •                             |
|                           | 365              | •       | •       | •                             | n/d                           | • +                           | •                             | •                             |
|                           | 368              | •       | •       | n/d                           | n/d                           | • +                           | • +                           | •                             |
|                           | 377              | •       | •       | •                             | n/d                           | • +                           | • +                           | • +                           |
| RING2                     | 418              | n/d     | n/d     | n/d                           | •                             | n/d                           | n/d                           | n/d                           |
|                           | 421              | n/d     | n/d     | n/d                           | • +                           | n/d                           | • +                           | • +                           |
|                           | 431              | n/d     | •       | n/d                           | •                             | n/d                           | •                             | •                             |
|                           | 436              | n/d     | n/d     | n/d                           | • +                           | n/d                           | •                             | •                             |
|                           | 441              | n/d     | n/d     | n/d                           | • +                           | n/d                           | •                             | •                             |
|                           | 446              | •       | •       | n/d                           | n/d                           | • +                           | • +                           | • +                           |
|                           | 449              | •       | •       | n/d                           | n/d                           | • +                           | • +                           | •                             |
|                           | 451              | •       | •       | n/d                           | n/d                           | • +                           | •                             | •                             |
| 457                       | •                | •       | •       | •                             | • +                           | •                             | • +                           |                               |
| % Parkin protein coverage |                  | 83      | 89      | 57                            | 60                            | 86                            | 98                            | 97                            |
| # peptides identified     |                  | 40      | 35      | 22                            | 33                            | 38                            | 51                            | 47                            |
| # Cysteines identified    |                  | 27      | 31      | 16                            | 21                            | 28                            | 34                            | 34                            |
| # IAA-cysteines           |                  | 27      | 30      | 16                            | 21                            | 28                            | 34                            | 34                            |
| IAA-cys/identified-cys    |                  | 27/27   | 30/31   | 16/16                         | 21/21                         | 28/28                         | 34/34                         | 34/34                         |
| %                         |                  | 100     | 97      | 100                           | 100                           | 100                           | 100                           | 100                           |
| # NEM-cysteines           |                  | 0       | n/a     | 3                             | 5                             | 26                            | 16                            | 14                            |
| NEM-cys/identified-cys    |                  | 0/27    | n/a     | 3/16                          | 5/21                          | 26/28                         | 16/34                         | 14/34                         |
| %                         |                  | 0       | n/a     | 19                            | 24                            | 93                            | 47                            | 41                            |

• IAA + NEM
